# Supplementary material for: Synthesis of imidazoles via cascade reaction of nitroallylic acetates with amidines and studies on their trypanocidal activity
Source: Royal Society of Chemistry journal article supplement (doi:10.1039/c4ob02561j), 2014-12-24
Supplement: c4ob02561j2.pdf [file c4ob02561j2.pdf]

Supporting information for

## Synthesis of Imidazoles via Cascade Reaction of Nitroallylic Acetates with Amidines and Studies on Their Trypanocidal Activity

Tarun Kumar, <sup>a</sup>Deepti Verma, <sup>a</sup>Rubem F. S. Menna-Barreto, <sup>b</sup>Wagner O. Valença, <sup>c</sup>Eufrânio N. da Silva Júnior<sup>c\*</sup> and Irishi N. N. Namboothiri<sup>a\*</sup>

<sup>a</sup>Indian Institute of Technology Bombay, Mumbai 400 076, India; <sup>b</sup>Oswaldo Cruz Institute, FIOCRUZ, Rio de Janeiro, RJ, 21045-900, Brazil; <sup>c</sup>Institute of Exact Sciences, Department of Chemistry, Federal University of Minas Gerais, Belo Horizonte, MG, 31270-901, Brazil

### Table of contents

| Entry | Figure                                                | Page |
|-------|-------------------------------------------------------|------|
| 1     | Figure S1. <sup>1</sup> H NMR spectrum of <b>3a</b>   | 4    |
| 2     | Figure S2. <sup>13</sup> C NMR spectrum of <b>3a</b>  | 5    |
| 3     | Figure S3. HRMS spectrum of <b>3a</b>                 | 6    |
| 4     | Figure S4. <sup>1</sup> H NMR spectrum of <b>3b</b>   | 7    |
| 5     | Figure S5. <sup>13</sup> C NMR spectrum of <b>3b</b>  | 8    |
| 6     | Figure S6. HRMS spectrum of <b>3b</b>                 | 9    |
| 7     | Figure S7. <sup>1</sup> H NMR spectrum of <b>3c</b>   | 10   |
| 8     | Figure S8. <sup>13</sup> C NMR spectrum of <b>3c</b>  | 11   |
| 9     | Figure S9. HRMS spectrum of <b>3c</b>                 | 12   |
| 10    | Figure S10. <sup>1</sup> H NMR spectrum of <b>3d</b>  | 13   |
| 11    | Figure S11. <sup>13</sup> C NMR spectrum of <b>3d</b> | 14   |
| 12    | Figure S12. HRMS spectrum of <b>3d</b>                | 15   |
| 13    | Figure S13. <sup>1</sup> H NMR spectrum of <b>3e</b>  | 16   |
| 14    | Figure S14. <sup>13</sup> C NMR spectrum of <b>3e</b> | 17   |
| 15    | Figure S15. HRMS spectrum of <b>3e</b>                | 18   |
| 16    | Figure S16. <sup>1</sup> H NMR spectrum of <b>3f</b>  | 19   |

|    |                                                       |    |
|----|-------------------------------------------------------|----|
| 17 | Figure S17. $^{13}\text{C}$ NMR spectrum of <b>3f</b> | 20 |
| 18 | Figure S18. HRMS spectrum of <b>3f</b>                | 21 |
| 19 | Figure S19. $^1\text{H}$ NMR spectrum of <b>3g</b>    | 22 |
| 20 | Figure S20. $^{13}\text{C}$ NMR spectrum of <b>3g</b> | 23 |
| 21 | Figure S21. $^{19}\text{F}$ NMR spectrum of <b>3g</b> | 24 |
| 22 | Figure S22. HRMS spectrum of <b>3g</b>                | 25 |
| 23 | Figure S23. $^1\text{H}$ NMR spectrum of <b>3h</b>    | 26 |
| 24 | Figure S24. $^{13}\text{C}$ NMR spectrum of <b>3h</b> | 27 |
| 25 | Figure S25. HRMS spectrum of <b>3h</b>                | 28 |
| 26 | Figure S26. $^1\text{H}$ NMR spectrum of <b>3i</b>    | 29 |
| 27 | Figure S27. $^{13}\text{C}$ NMR spectrum of <b>3i</b> | 30 |
| 28 | Figure S28. HRMS spectrum of <b>3i</b>                | 31 |
| 29 | Figure S29. $^1\text{H}$ NMR spectrum of <b>3j</b>    | 32 |
| 30 | Figure S30. $^{13}\text{C}$ NMR spectrum of <b>3j</b> | 33 |
| 31 | Figure S31. HRMS spectrum of <b>3j</b>                | 34 |
| 32 | Figure S32. $^1\text{H}$ NMR spectrum of <b>3k</b>    | 35 |
| 33 | Figure S33. $^{13}\text{C}$ NMR spectrum of <b>3k</b> | 36 |
| 34 | Figure S34. HRMS spectrum of <b>3k</b>                | 37 |
| 35 | Figure S35. $^1\text{H}$ NMR spectrum of <b>3l</b>    | 38 |
| 36 | Figure S36. $^{13}\text{C}$ NMR spectrum of <b>3l</b> | 39 |
| 37 | Figure S37. HRMS spectrum of <b>3l</b>                | 40 |
| 38 | Figure S38. $^1\text{H}$ NMR spectrum of <b>3m</b>    | 41 |
| 39 | Figure S39. $^{13}\text{C}$ NMR spectrum of <b>3m</b> | 42 |
| 40 | Figure S40. HRMS spectrum of <b>3m</b>                | 43 |
| 41 | Figure S41. $^1\text{H}$ NMR spectrum of <b>3n</b>    | 44 |
| 42 | Figure S42. $^{13}\text{C}$ NMR spectrum of <b>3n</b> | 45 |
| 43 | Figure S43. HRMS spectrum of <b>3n</b>                | 46 |
| 44 | Figure S44. $^1\text{H}$ NMR spectrum of <b>4a</b>    | 47 |

|    |                                                       |    |
|----|-------------------------------------------------------|----|
| 45 | Figure S45. $^{13}\text{C}$ NMR spectrum of <b>4a</b> | 48 |
| 46 | Figure S46. HRMS spectrum of <b>4a</b>                | 49 |
| 47 | Figure S47. $^1\text{H}$ NMR spectrum of <b>4c</b>    | 50 |
| 48 | Figure S48. $^{13}\text{C}$ NMR spectrum of <b>4c</b> | 51 |
| 49 | Figure S49. HRMS spectrum of <b>4c</b>                | 52 |
| 50 | Figure S50. $^1\text{H}$ NMR spectrum of <b>4d</b>    | 53 |
| 51 | Figure S51. $^{13}\text{C}$ NMR spectrum of <b>4d</b> | 54 |
| 52 | Figure S52. HRMS spectrum of <b>4d</b>                | 55 |
| 53 | Figure S53. $^1\text{H}$ NMR spectrum of <b>4e</b>    | 56 |
| 54 | Figure S54. $^{13}\text{C}$ NMR spectrum of <b>4e</b> | 57 |
| 55 | Figure S55. HRMS spectrum of <b>4e</b>                | 58 |
| 56 | Figure S56. $^1\text{H}$ NMR spectrum of <b>4f</b>    | 59 |
| 57 | Figure S57. $^{13}\text{C}$ NMR spectrum of <b>4f</b> | 60 |
| 58 | Figure S58. HRMS spectrum of <b>4f</b>                | 61 |
| 59 | Figure S59. $^1\text{H}$ NMR spectrum of <b>5a</b>    | 62 |
| 60 | Figure S60. $^{13}\text{C}$ NMR spectrum of <b>5a</b> | 63 |
| 61 | Figure S61. HRMS spectrum of <b>5a</b>                | 64 |
| 62 | Figure S62. $^1\text{H}$ NMR spectrum of <b>5d</b>    | 65 |
| 63 | Figure S63. $^{13}\text{C}$ NMR spectrum of <b>5d</b> | 66 |
| 64 | Figure S64. HRMS spectrum of <b>5d</b>                | 67 |
| 65 | Figure S65. $^1\text{H}$ NMR spectrum of <b>6d</b>    | 68 |
| 66 | Figure S66. $^{13}\text{C}$ NMR spectrum of <b>6d</b> | 69 |
| 67 | Figure S67. HRMS spectrum of <b>6d</b>                | 70 |
| 68 | Figure S68. $^1\text{H}$ NMR spectrum of <b>7a</b>    | 71 |
| 69 | Figure S69. $^{13}\text{C}$ NMR spectrum of <b>7a</b> | 72 |
| 70 | Figure S70. HRMS spectrum of <b>7a</b>                | 73 |
| 71 | Figure S71. $^1\text{H}$ NMR spectrum of <b>7d</b>    | 74 |
| 72 | Figure S72. $^{13}\text{C}$ NMR spectrum of <b>7d</b> | 75 |
| 73 | Figure S73. HRMS spectrum of <b>7d</b>                | 76 |

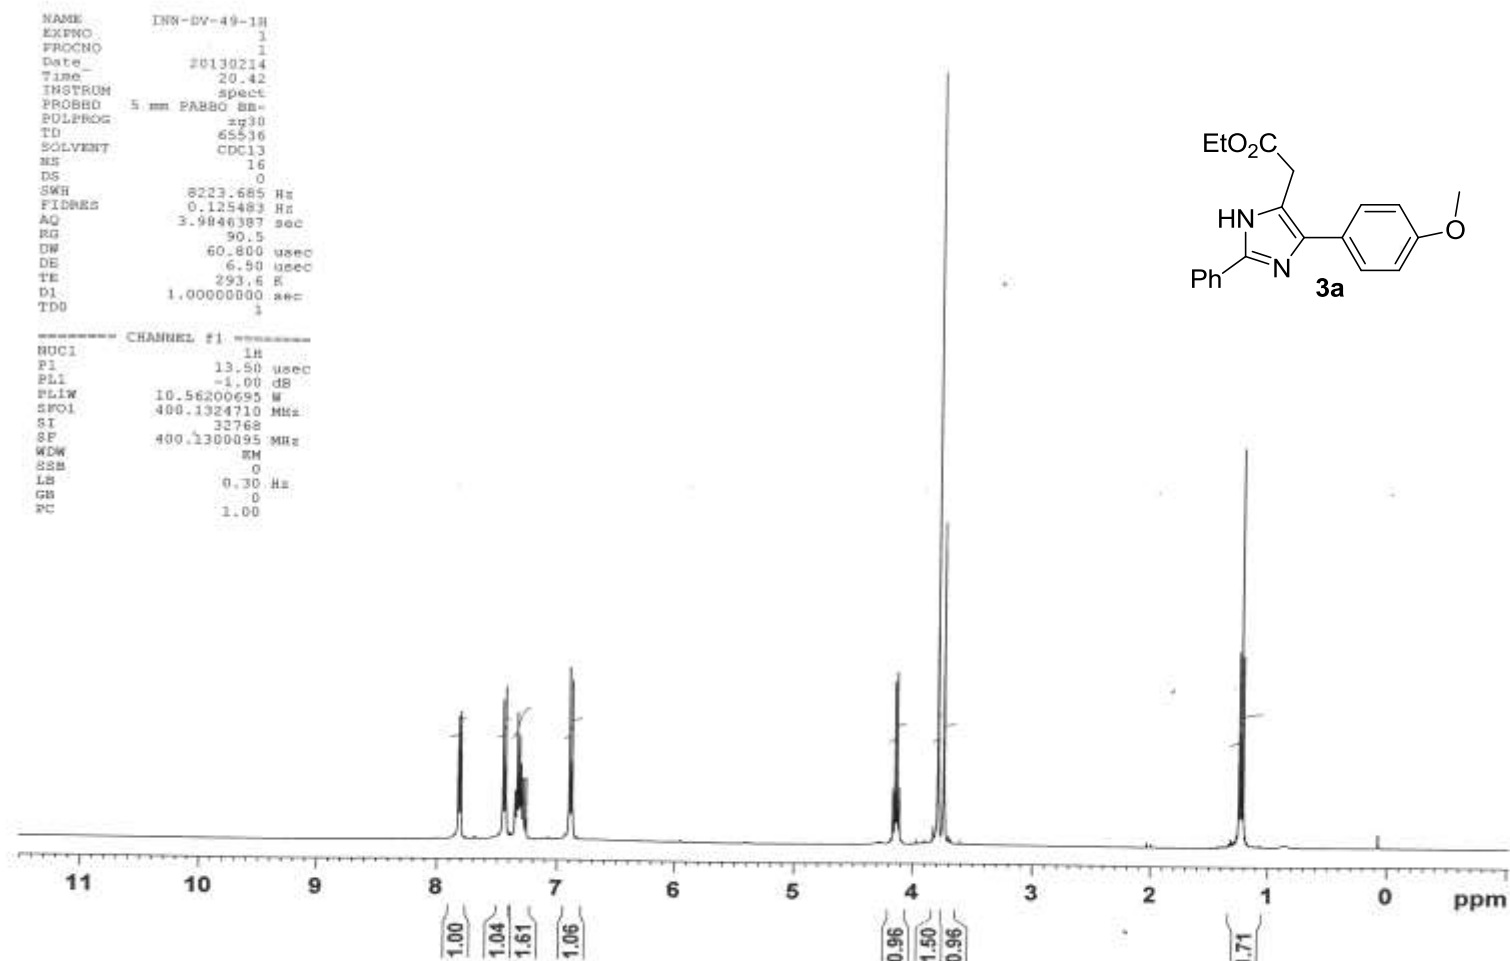

Figure S1.  $^1\text{H}$  NMR spectrum of **3a**

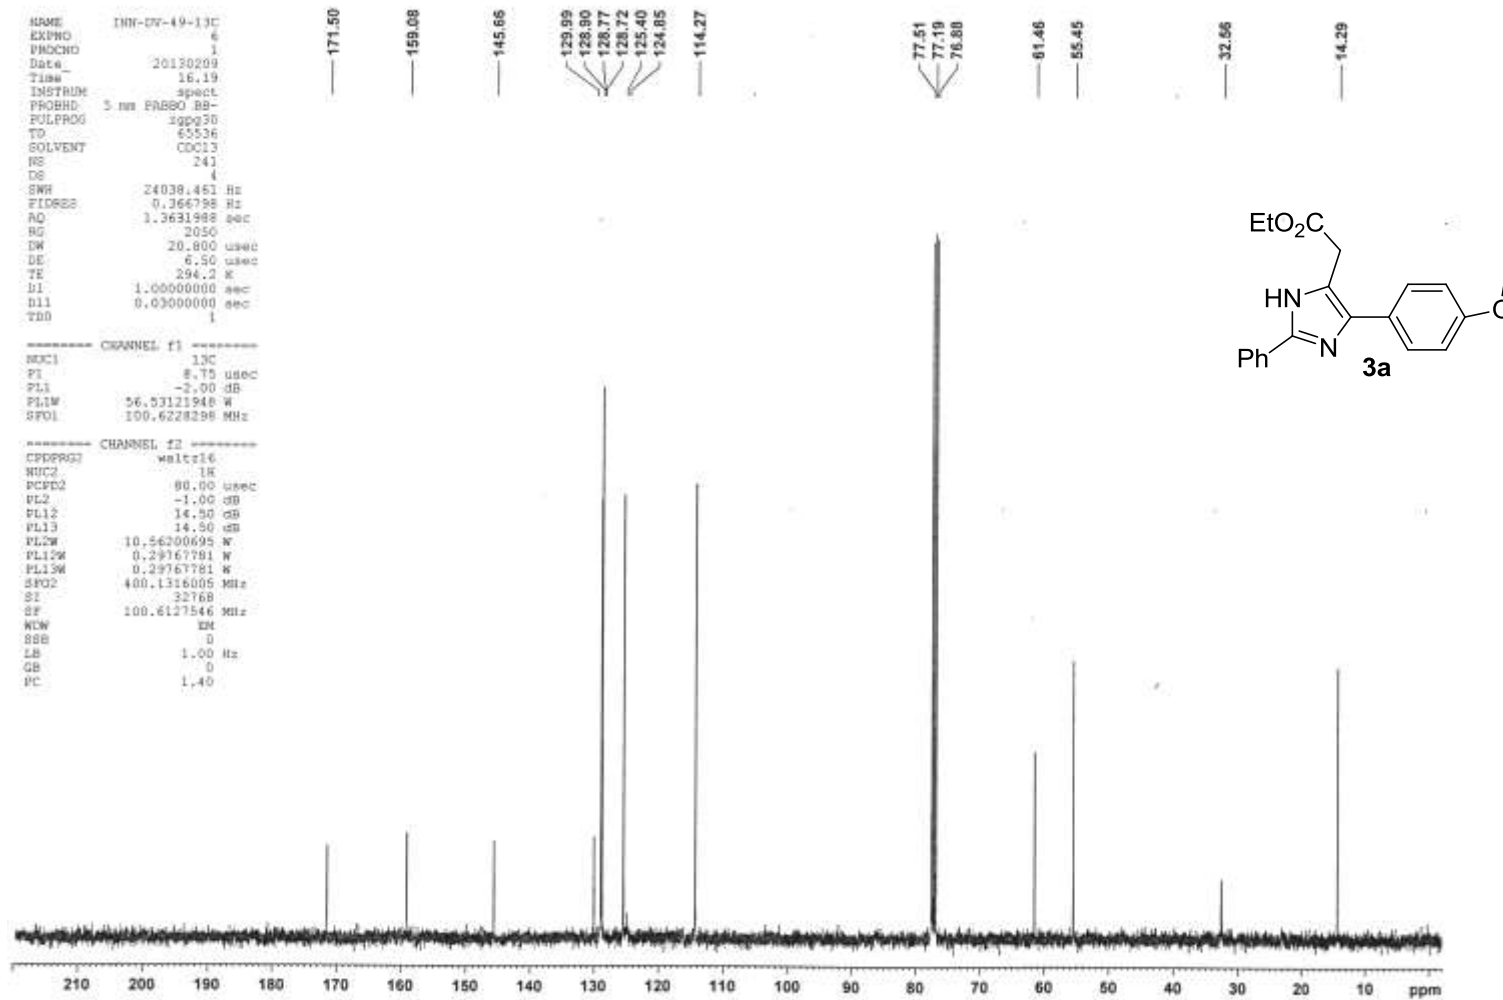

Figure S2.  $^{13}\text{C}$  NMR spectrum of **3a**

# DEPARTMENT OF CHEMISTRY, I.I.T.(B)

## Analysis Info

Analysis Name D:\Data\MAR-13\INN-DV-49.d  
 Method Tune\_pos\_Standard\_NAI-1000.m  
 Sample Name INN-DV-49  
 Comment C20H20N2O3

Acquisition Date 3/6/2013 2:16:30 PM

Operator IIT-B  
 Instrument maXis impact 282001.00081

## Acquisition Parameter

|             |          |                       |           |                  |           |
|-------------|----------|-----------------------|-----------|------------------|-----------|
| Source Type | ESI      | Ion Polarity          | Positive  | Set Nebulizer    | 2.1 Bar   |
| Focus       | Active   | Set Capillary         | 3500 V    | Set Dry Heater   | 180 °C    |
| Scan Begin  | 50 m/z   | Set End Plate Offset  | -500 V    | Set Dry Gas      | 7.0 l/min |
| Scan End    | 1000 m/z | Set Collision Cell RF | 800.0 Vpp | Set Divert Valve | Source    |

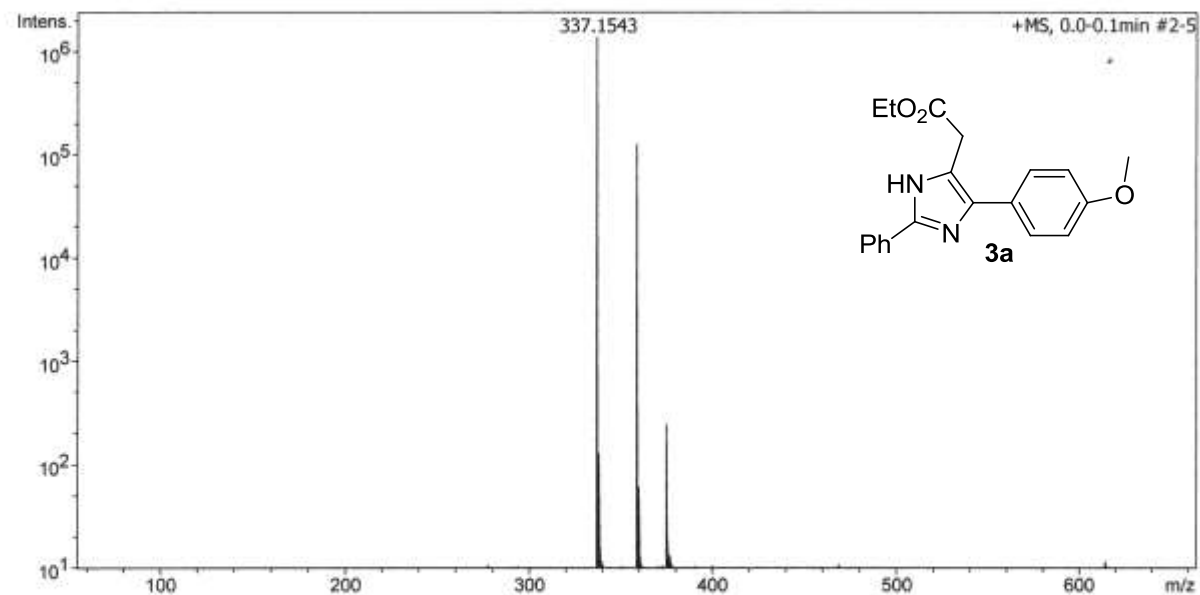

| Meas. m/z | # | Ion Formula | m/z      | err [ppm] | mSigma | # Sigma | Score  | rdb  | e <sup>-</sup> Conf | N-Rule |
|-----------|---|-------------|----------|-----------|--------|---------|--------|------|---------------------|--------|
| 337.1543  | 1 | C20H21N2O3  | 337.1547 | 1.0       | 9.0    | 1       | 100.00 | 11.5 | even                | ok     |

Figure S3. HRMS spectrum of **3a**

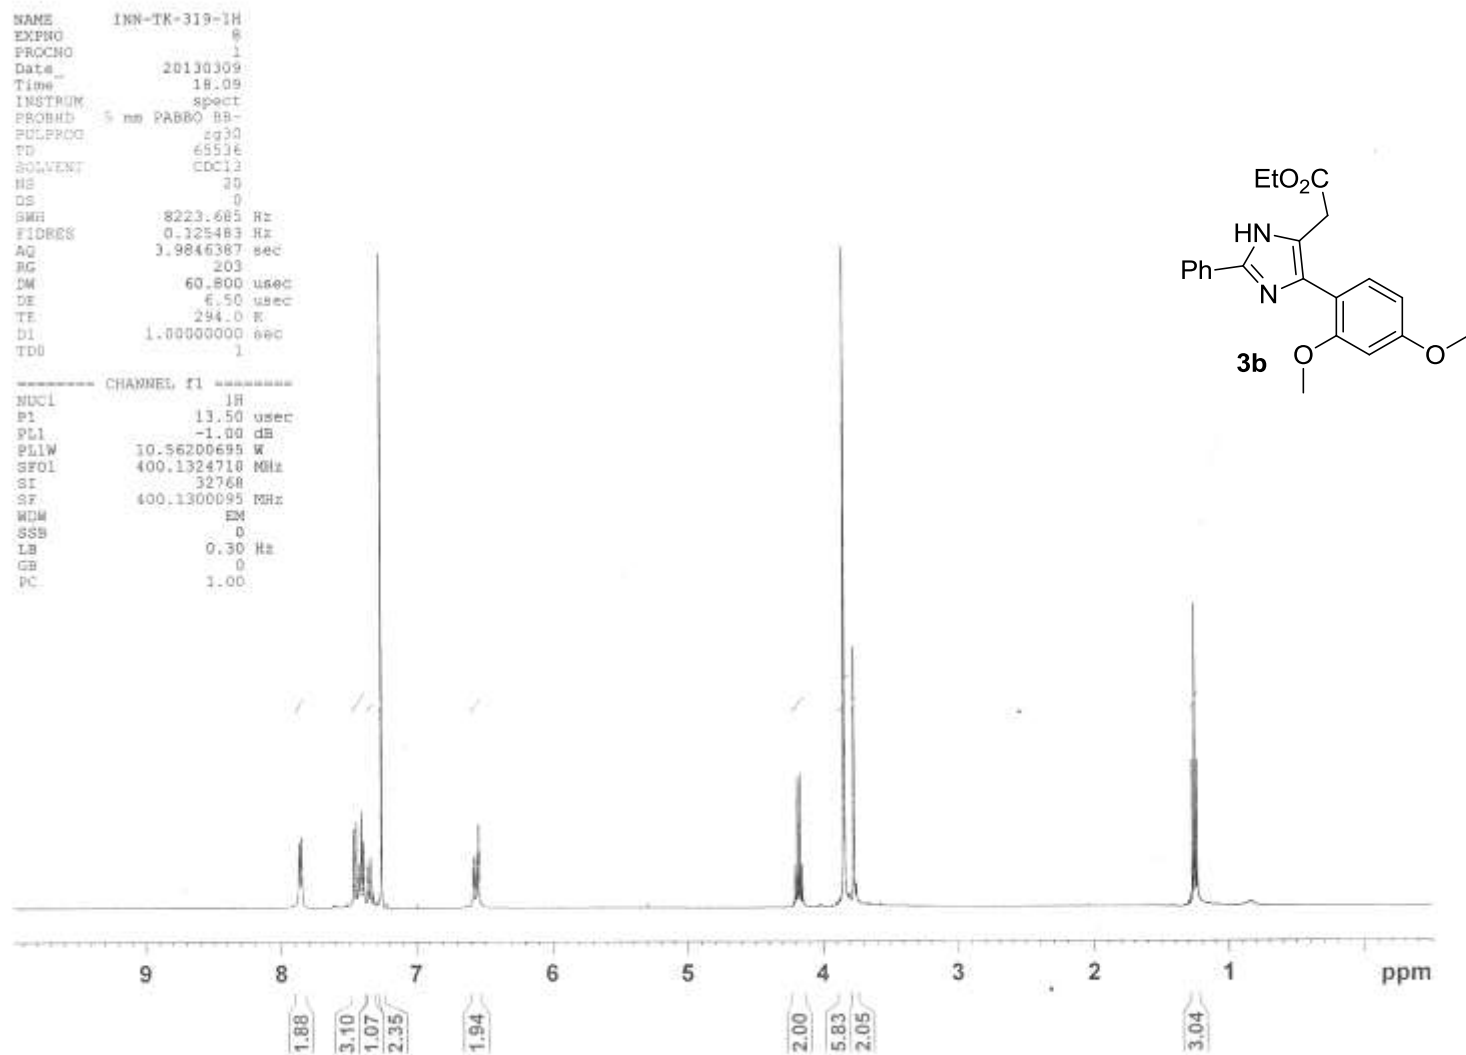

Figure S4.  $^1\text{H}$  NMR spectrum of **3b**

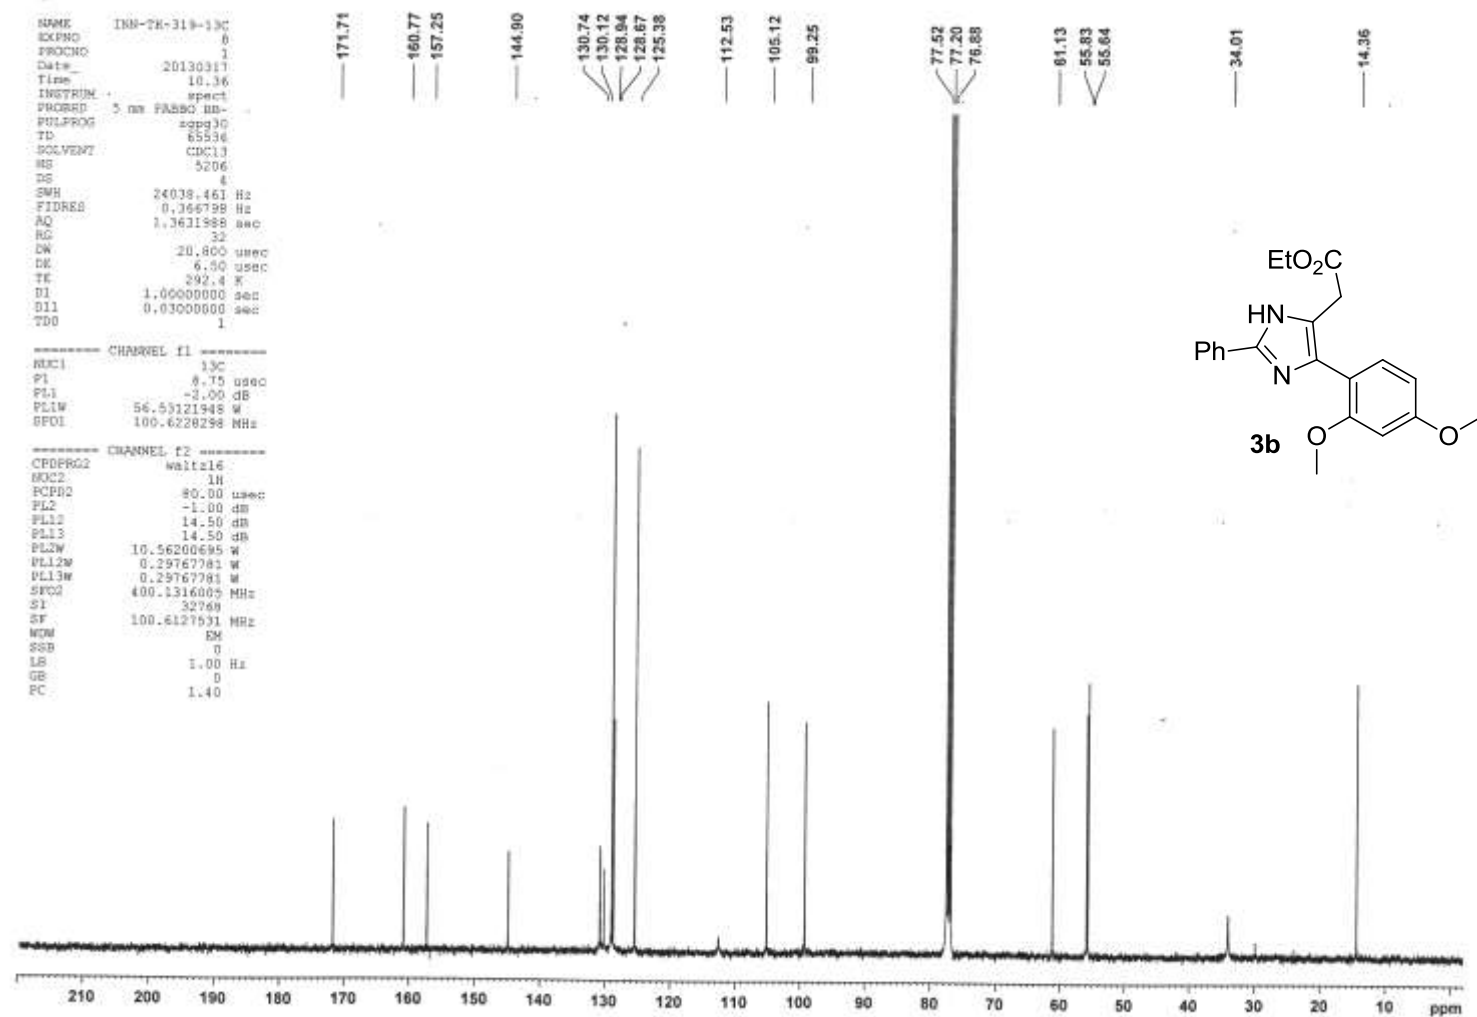

Figure S5. <sup>13</sup>C NMR spectrum of **3b**

# Indian Institute of Technology (B)

## Analysis Info

Analysis Name D:\Data\MAR-13\INN-TK-319.d  
 Method Tune\_pos\_Standard\_NAI-500.m  
 Sample Name INN-TK-319  
 Comment C21H22N2O4

Acquisition Date 3/15/2013 3:44:51 PM

Operator IIT-B  
 Instrument maXis impact 282001.00081

## Acquisition Parameter

|             |          |                       |           |                  |           |
|-------------|----------|-----------------------|-----------|------------------|-----------|
| Source Type | ESI      | Ion Polarity          | Positive  | Set Nebulizer    | 2.1 Bar   |
| Focus       | Active   | Set Capillary         | 3200 V    | Set Dry Heater   | 180 °C    |
| Scan Begin  | 50 m/z   | Set End Plate Offset  | -500 V    | Set Dry Gas      | 7.0 l/min |
| Scan End    | 1000 m/z | Set Collision Cell RF | 200.0 Vpp | Set Divert Valve | Source    |

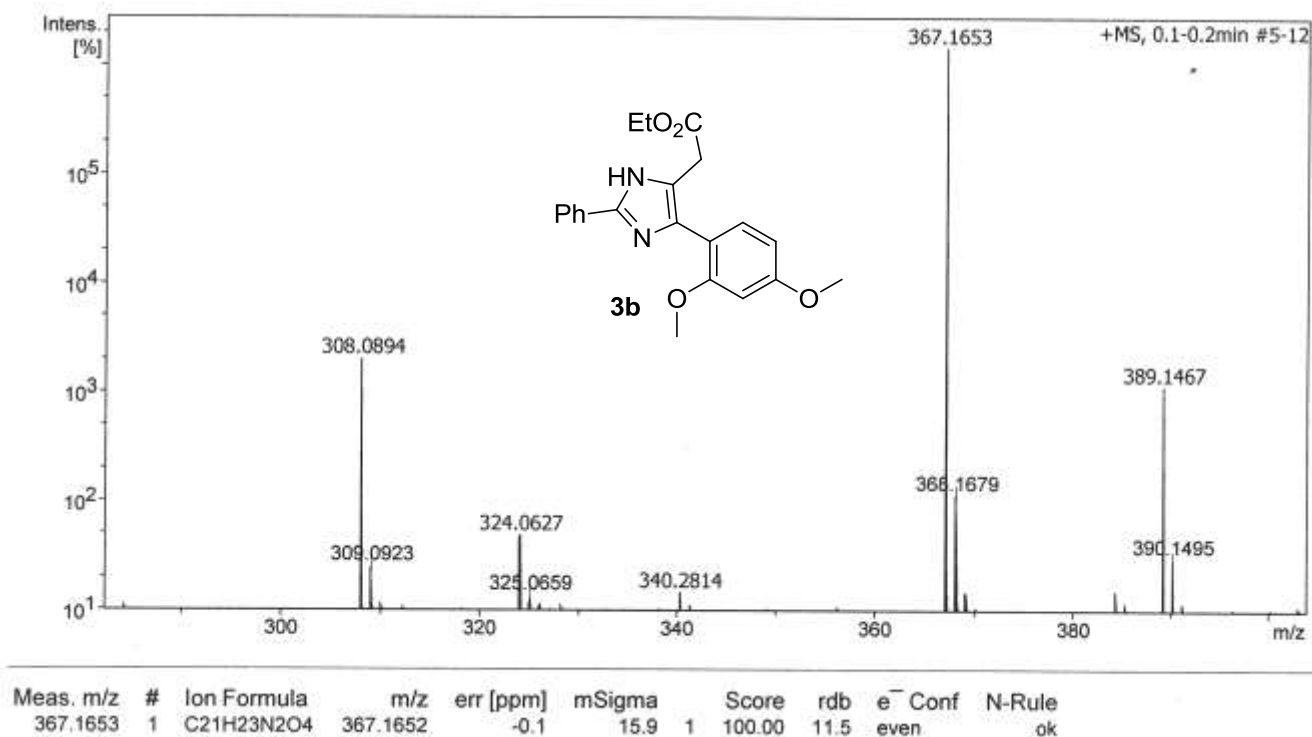

Figure S6. HRMS spectrum of **3b**

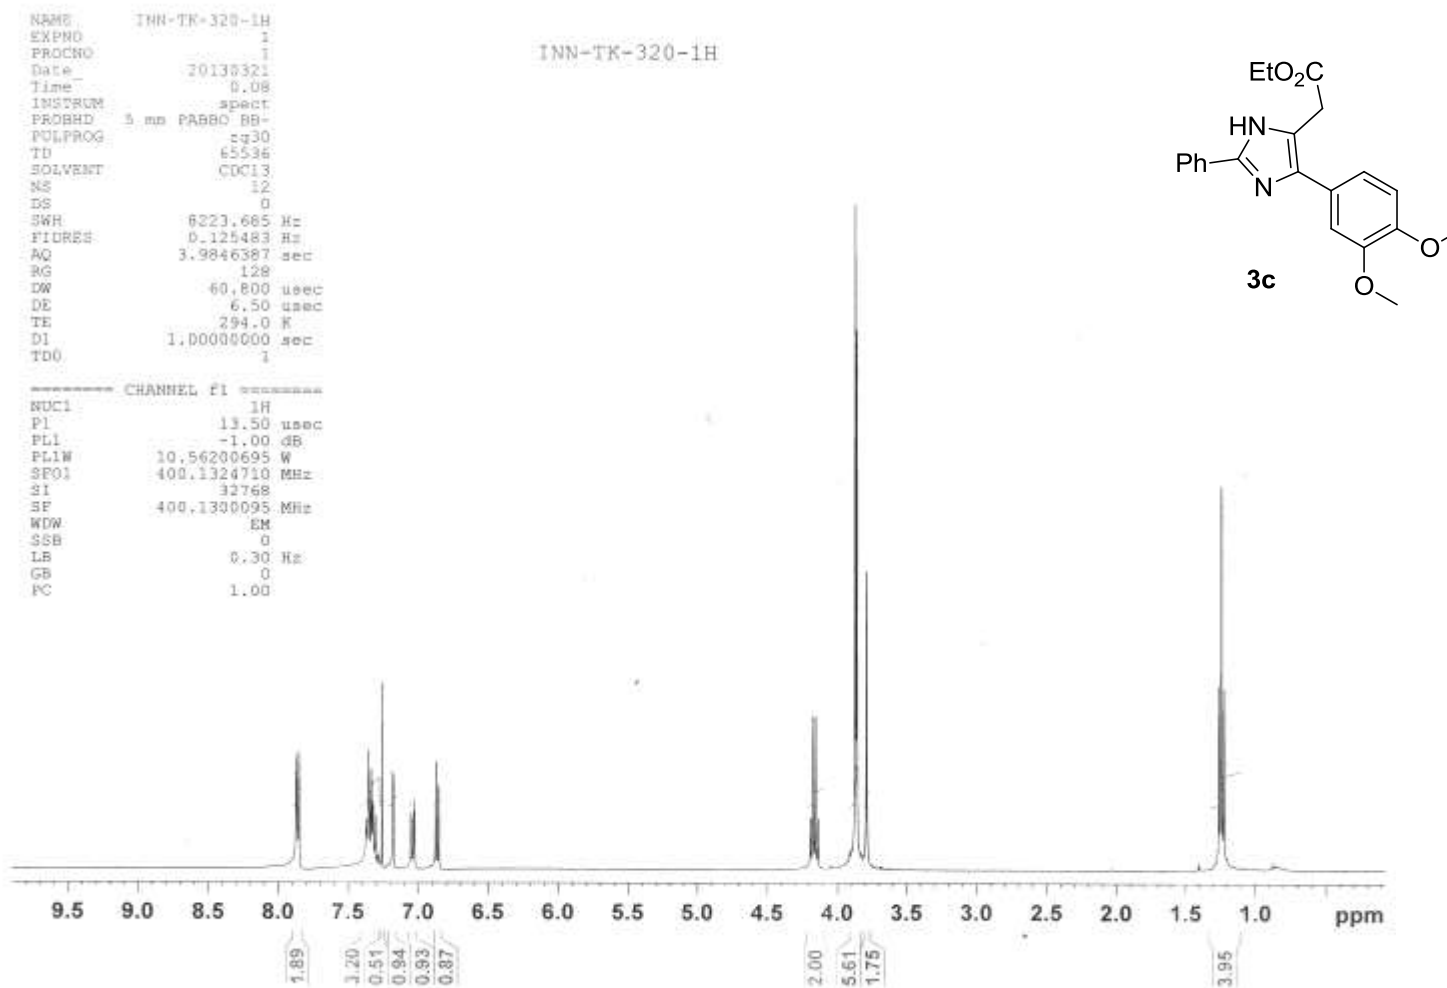

Figure S7.  $^1\text{H}$  NMR spectrum of **3c**

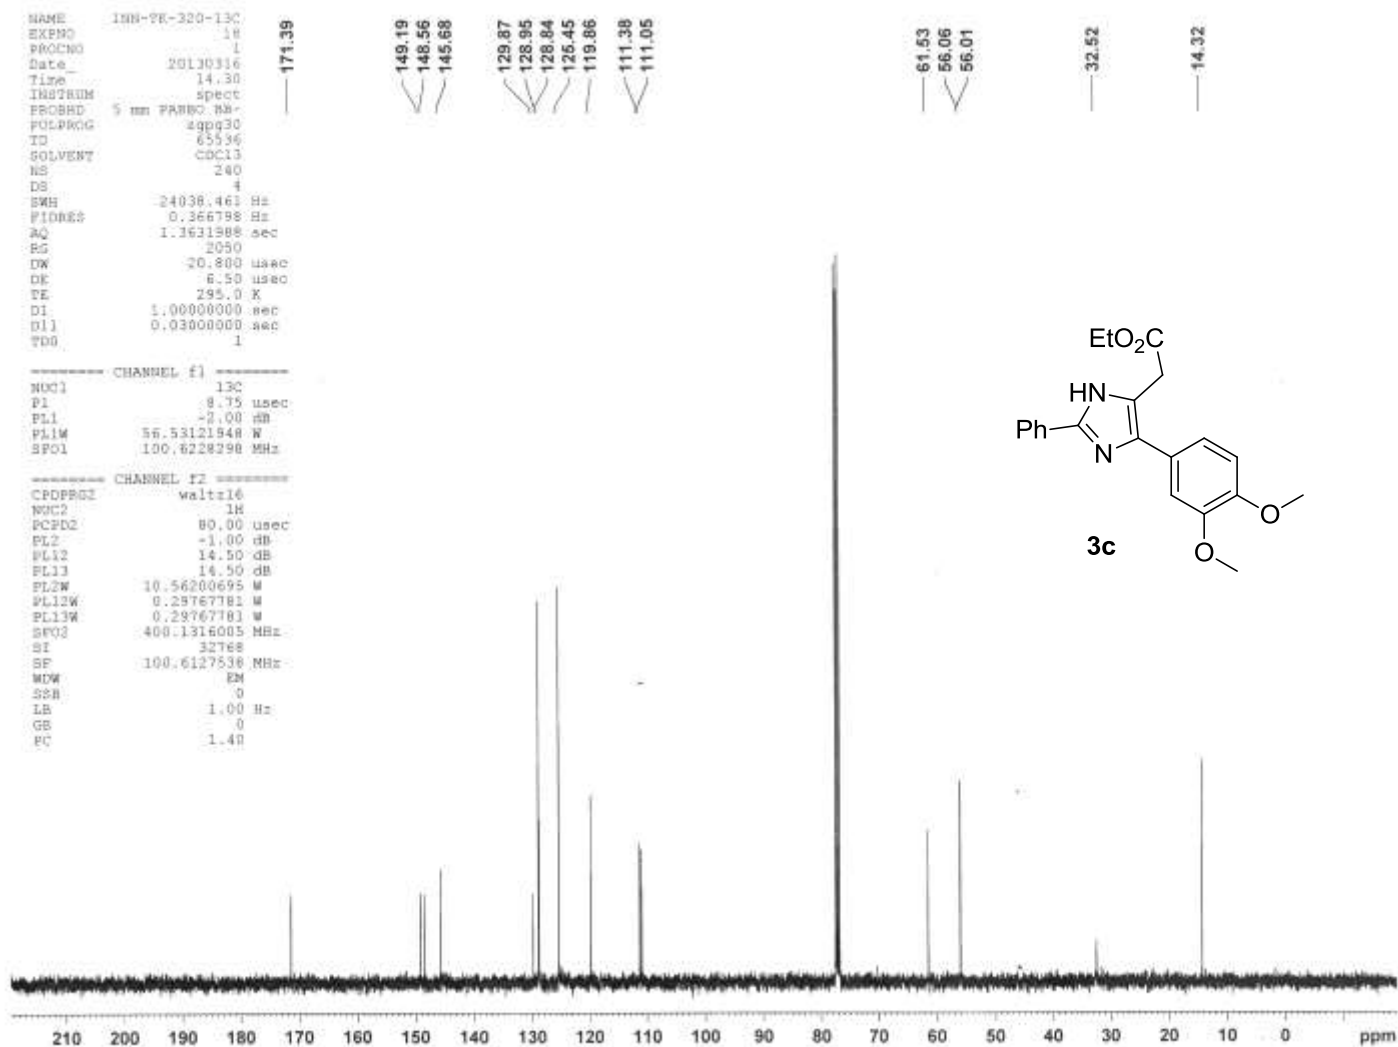

Figure S8. <sup>13</sup>C NMR spectrum of **3c**

# Indian Institute of Technology (B)

## Analysis Info

Analysis Name D:\Data\JUN-13\INN-TK-320.d  
 Method Tune\_pos\_Standard\_NAI-1000.m  
 Sample Name INN-TK-320  
 Comment C21H22N2O4

Acquisition Date 6/10/2013 6:03:19 PM

Operator IIT-B  
 Instrument maXis impact 282001.00081

## Acquisition Parameter

|             |          |                       |           |                  |           |
|-------------|----------|-----------------------|-----------|------------------|-----------|
| Source Type | ESI      | Ion Polarity          | Positive  | Set Nebulizer    | 2.1 Bar   |
| Focus       | Active   | Set Capillary         | 3500 V    | Set Dry Heater   | 180 °C    |
| Scan Begin  | 50 m/z   | Set End Plate Offset  | -500 V    | Set Dry Gas      | 7.0 l/min |
| Scan End    | 1000 m/z | Set Collision Cell RF | 400.0 Vpp | Set Divert Valve | Source    |

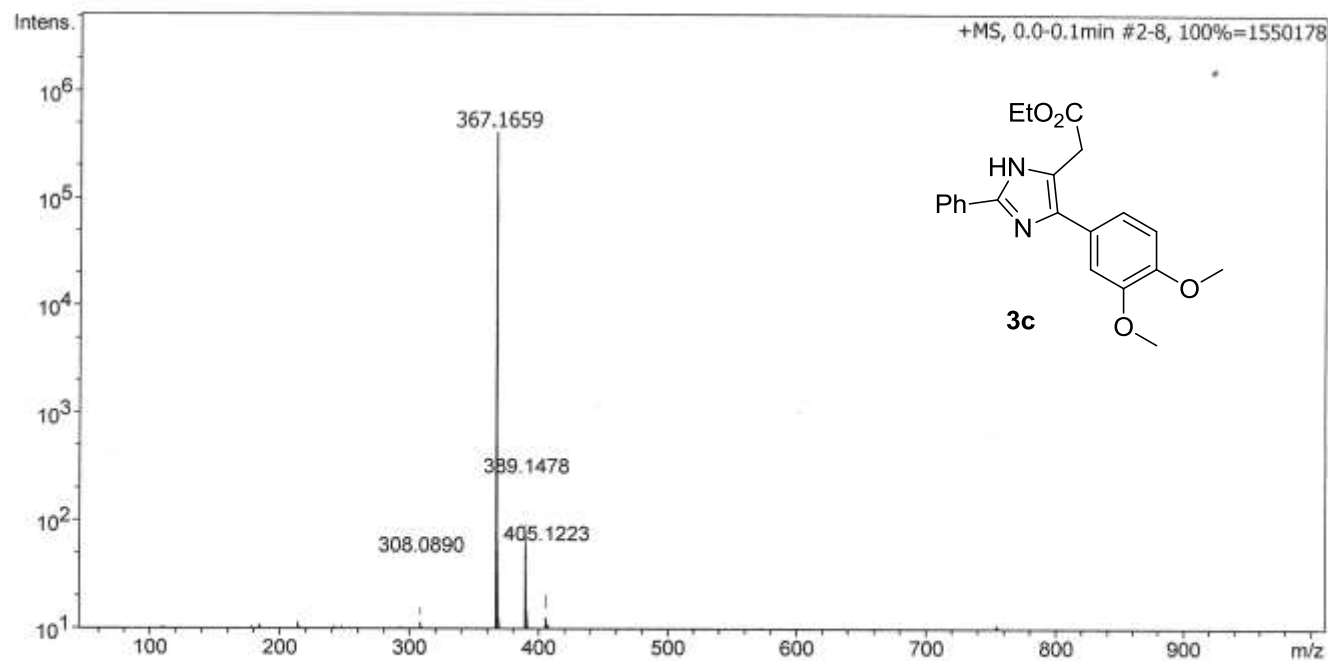

| Meas. m/z | # | Ion Formula | m/z      | err [ppm] | mSigma | # Sigma | Score  | rdB  | e <sup>-</sup> Conf | N-Rule |
|-----------|---|-------------|----------|-----------|--------|---------|--------|------|---------------------|--------|
| 367.1659  | 1 | C21H23N2O4  | 367.1652 | -1.9      | 30.3   | 1       | 100.00 | 11.5 | even                | ok     |

Figure S9. HRMS spectrum of **3c**

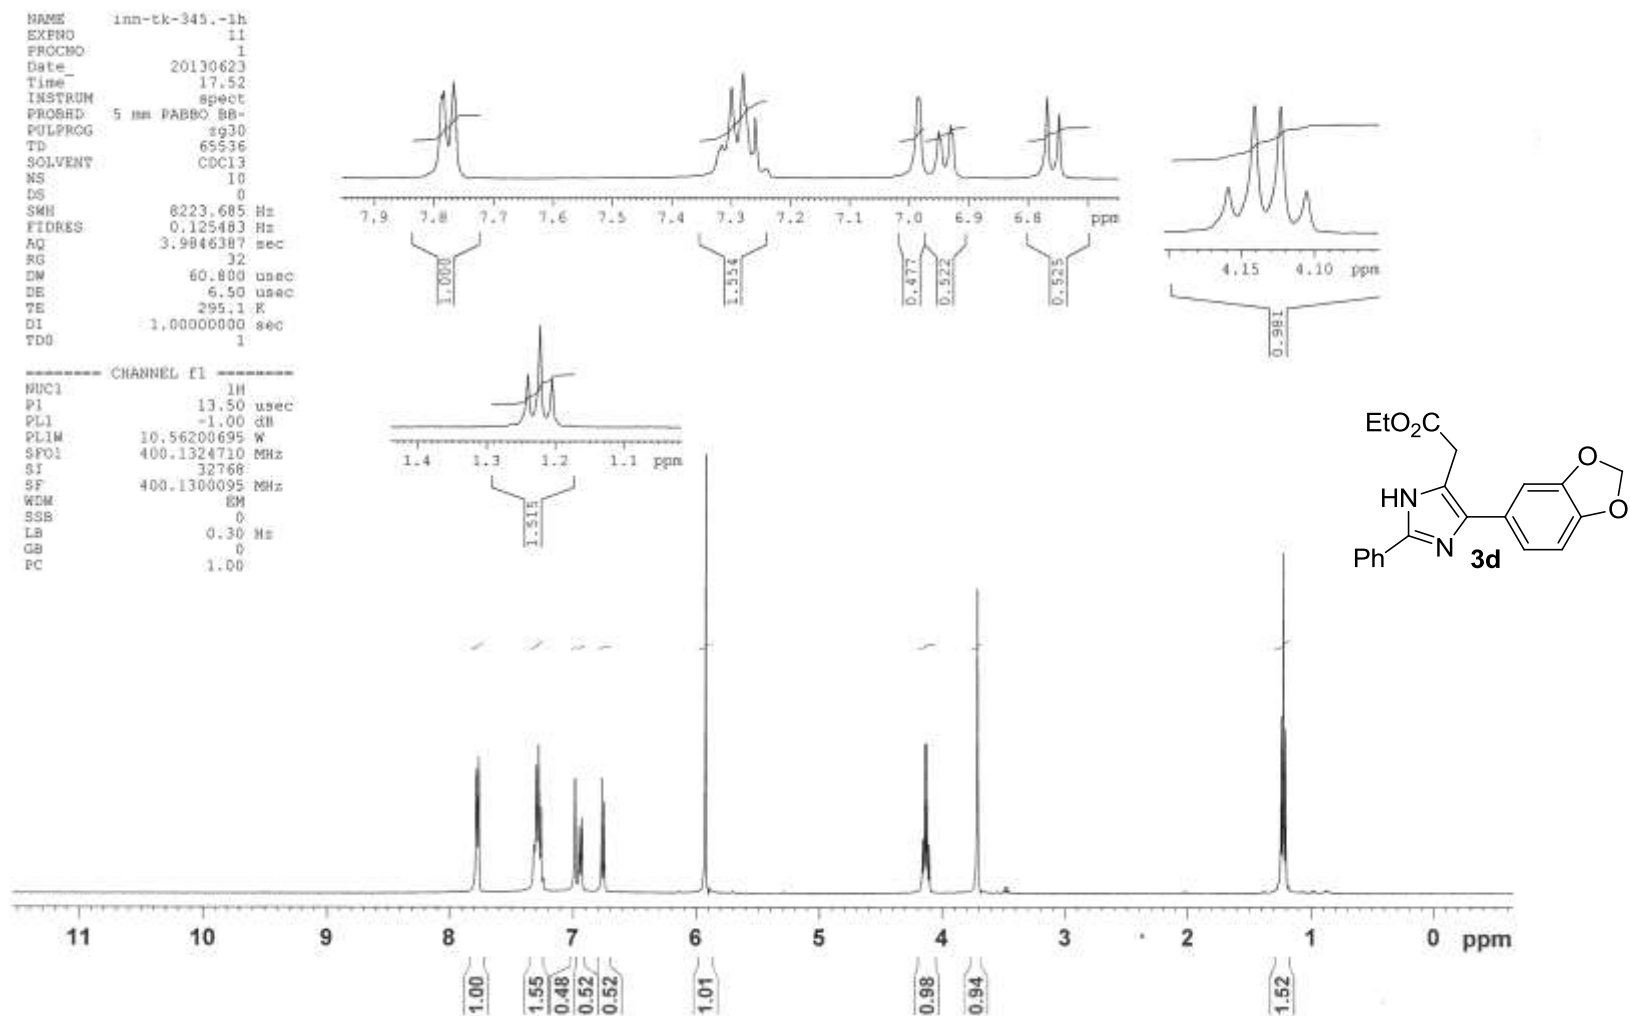

Figure S10. <sup>1</sup>H NMR spectrum of **3d**

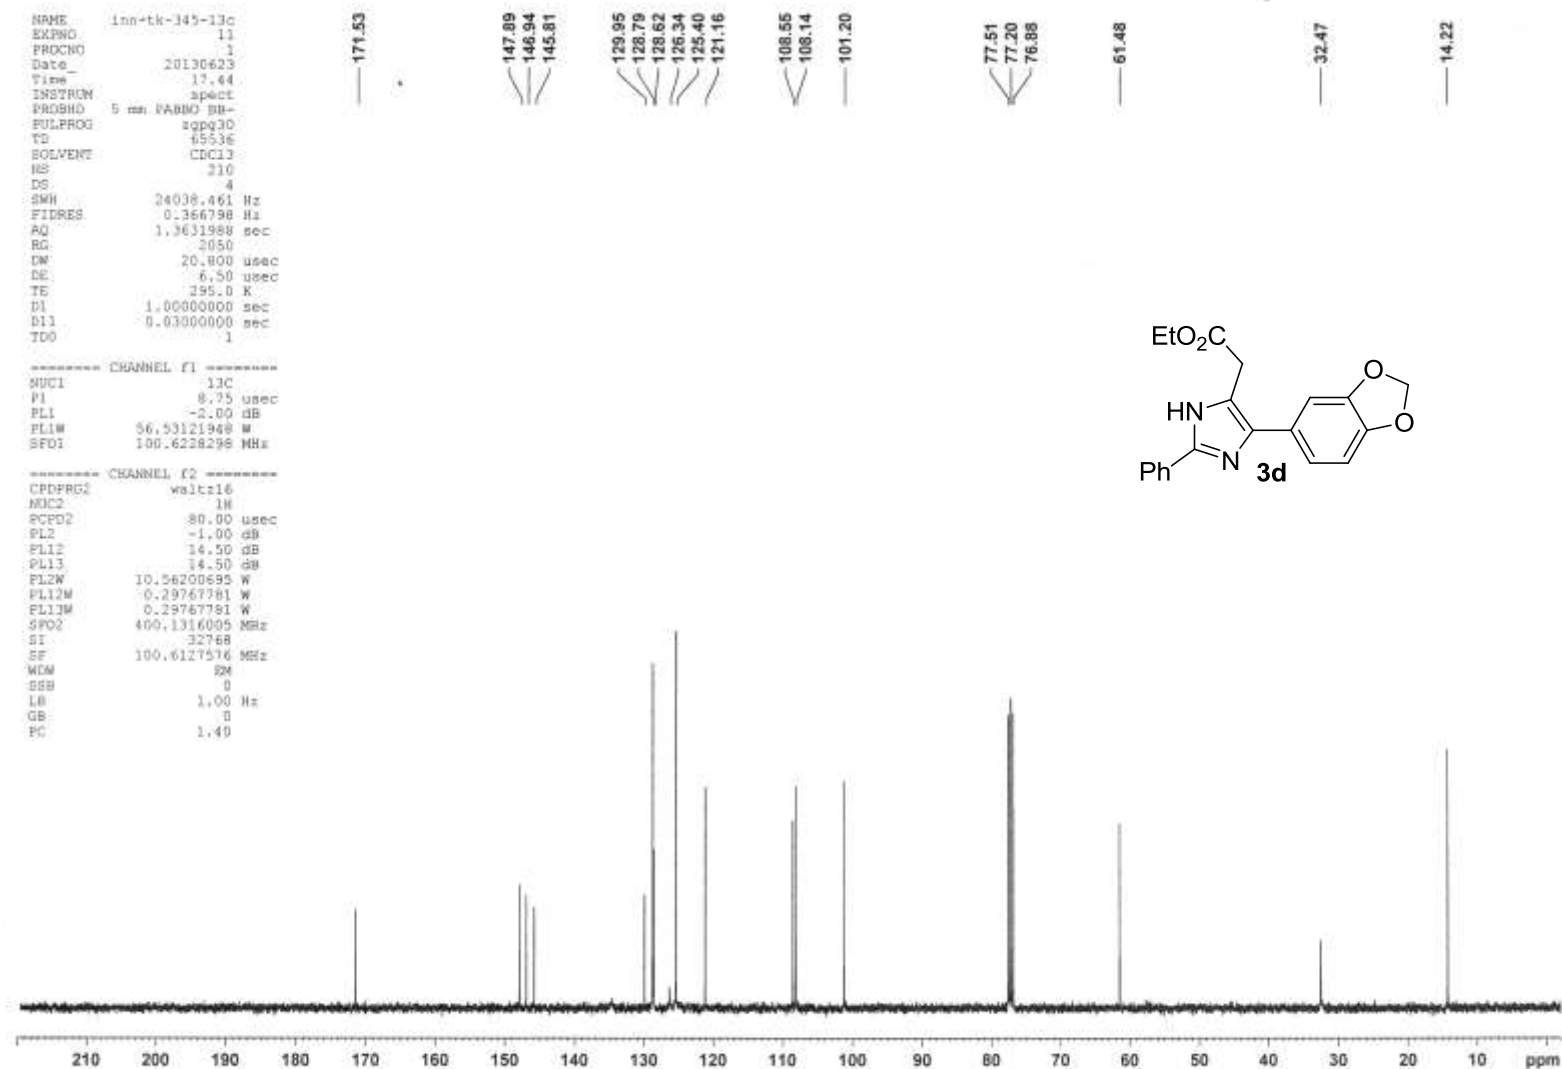

Figure S11. <sup>13</sup>C NMR spectrum of **3d**

# Indian Institute of Technology (B)

## Analysis Info

Analysis Name D:\Data\JUN-13\INN-TK-345.d  
 Method Tune\_pos\_Standard\_NAI-1000.m  
 Sample Name INN-TK-345  
 Comment C20H18N2O4

Acquisition Date 6/10/2013 6:27:32 PM

Operator IIT-B  
 Instrument maXis impact 282001.00081

## Acquisition Parameter

|             |          |                       |           |                  |           |
|-------------|----------|-----------------------|-----------|------------------|-----------|
| Source Type | ESI      | Ion Polarity          | Positive  | Set Nebulizer    | 2.1 Bar   |
| Focus       | Active   | Set Capillary         | 3500 V    | Set Dry Heater   | 180 °C    |
| Scan Begin  | 50 m/z   | Set End Plate Offset  | -500 V    | Set Dry Gas      | 7.0 l/min |
| Scan End    | 1000 m/z | Set Collision Cell RF | 400.0 Vpp | Set Divert Valve | Source    |

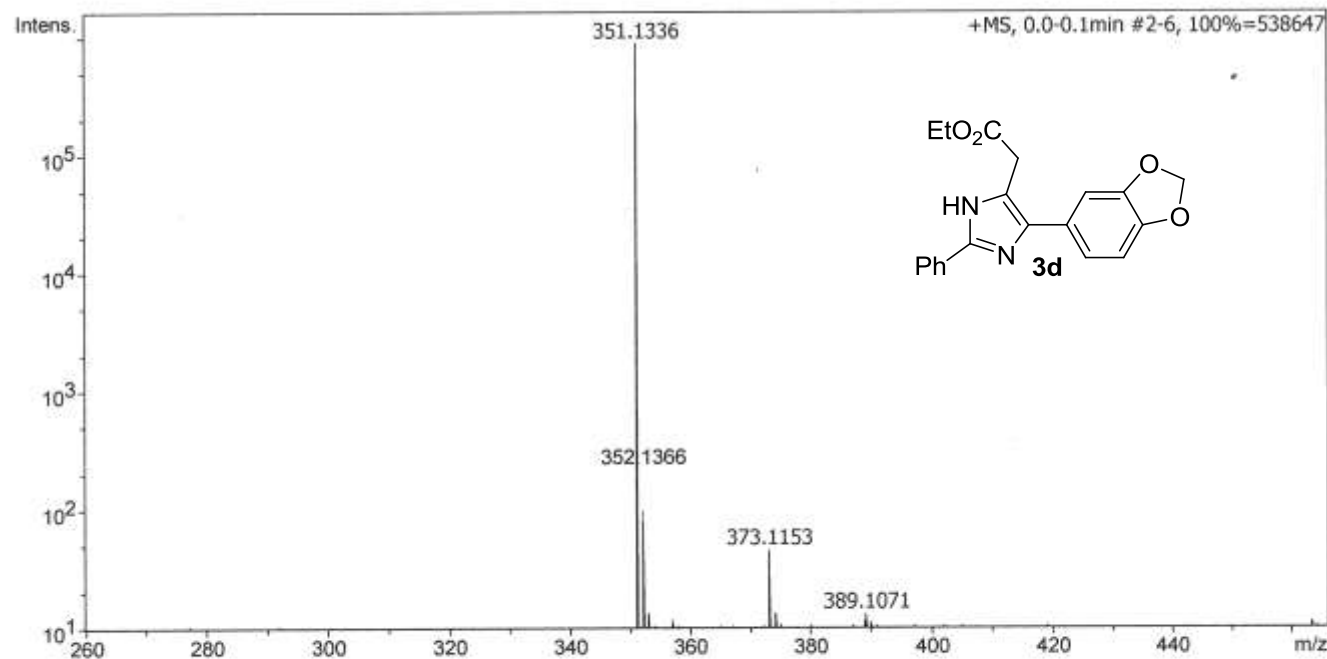

| Meas. m/z | # | Ion Formula | m/z      | err [ppm] | mSigma | # Sigma | Score  | rdB  | e <sup>-</sup> Conf | N-Rule |
|-----------|---|-------------|----------|-----------|--------|---------|--------|------|---------------------|--------|
| 351.1336  | 1 | C20H19N2O4  | 351.1339 | 0.8       | 22.0   | 1       | 100.00 | 12.5 | even                | ok     |

Figure S12. HRMS spectrum of **3d**

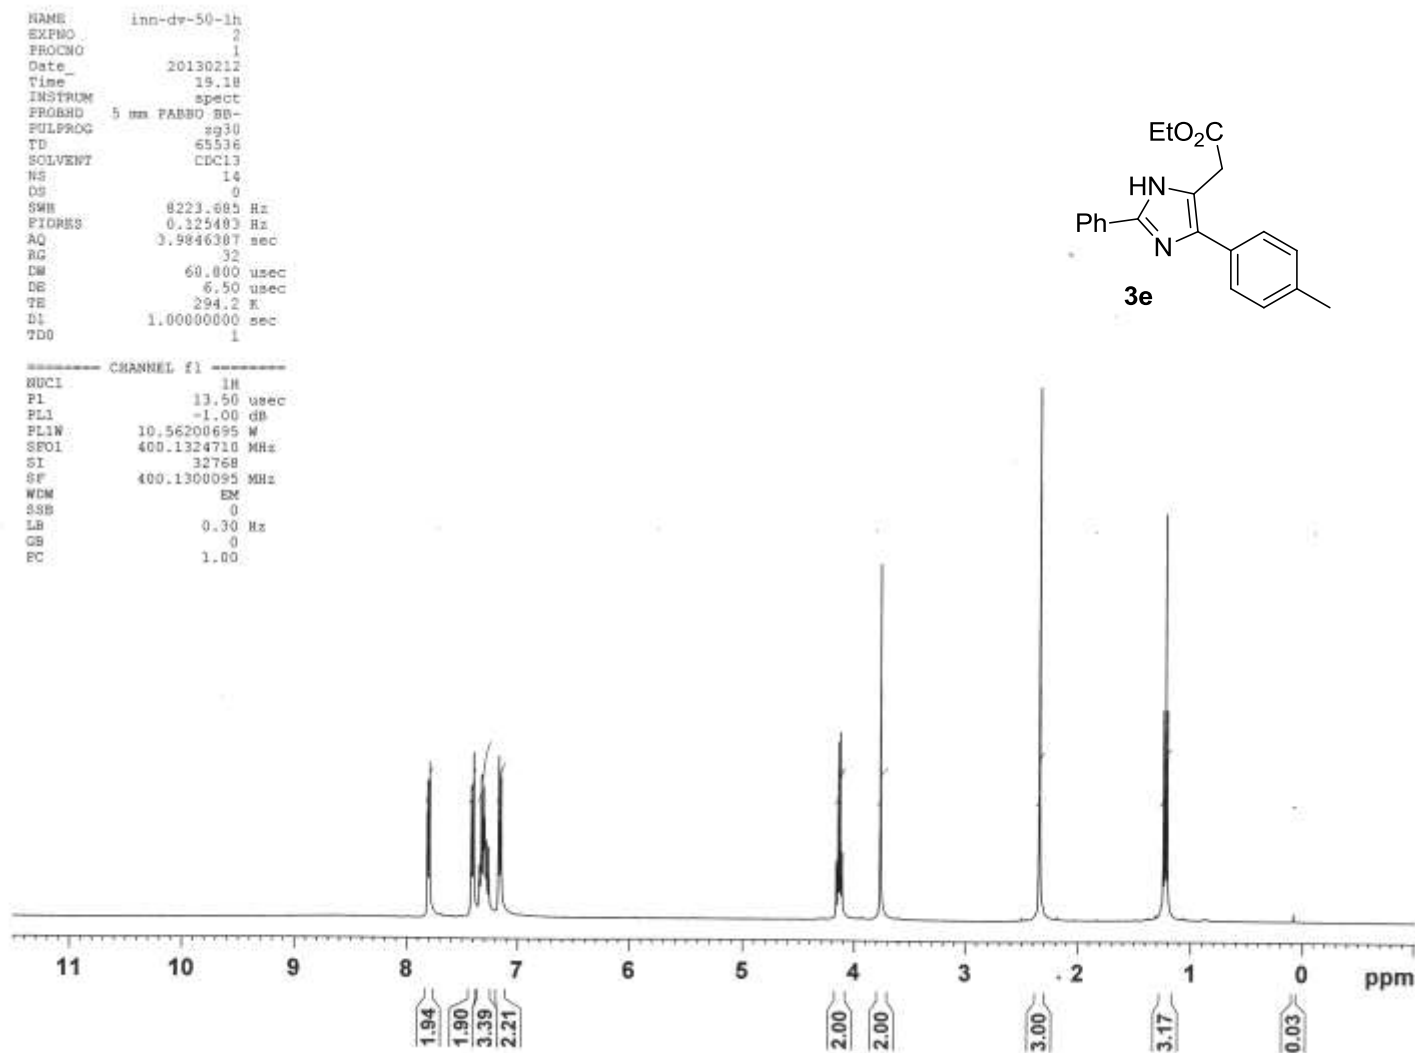

Figure S13.  $^1\text{H}$  NMR spectrum of **3e**

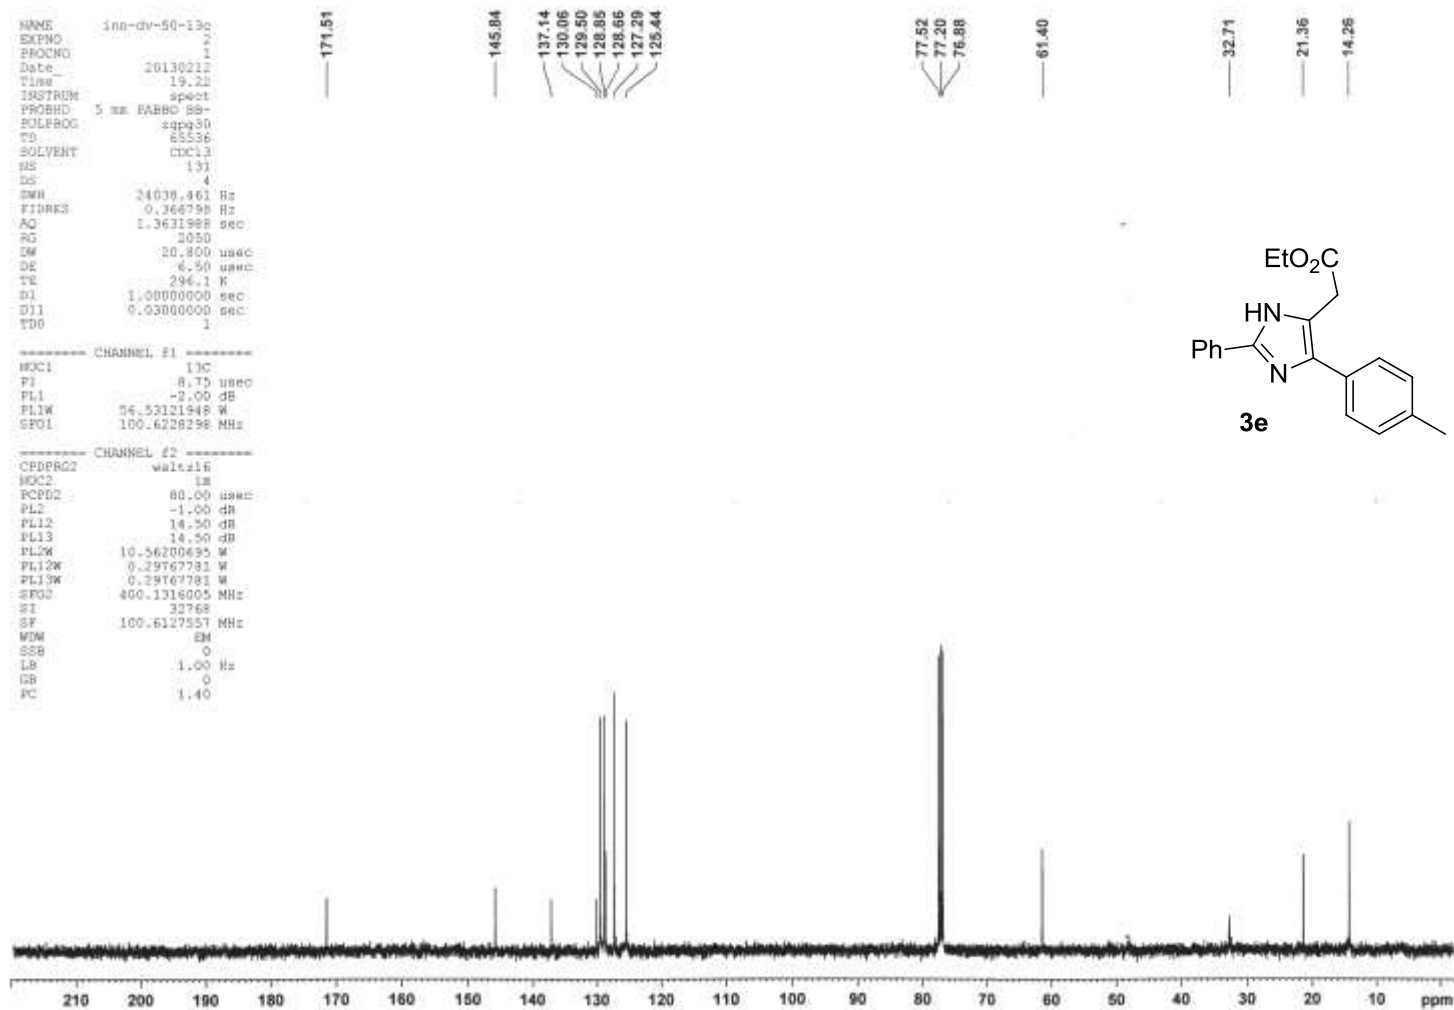

Figure S14. <sup>13</sup>C NMR spectrum of **3e**

# DEPARTMENT OF CHEMISTRY, I.I.T.(B)

## Analysis Info

Analysis Name D:\Data\MAR-13\INN-DV-50.d  
 Method Tune\_pos\_Standard\_NAI-1000.m  
 Sample Name INN-DV-50  
 Comment C20H20N2O2

Acquisition Date 3/6/2013 2:39:04 PM

Operator IIT-B  
 Instrument maXis impact 282001.00081

## Acquisition Parameter

|             |          |                       |           |                  |           |
|-------------|----------|-----------------------|-----------|------------------|-----------|
| Source Type | ESI      | Ion Polarity          | Positive  | Set Nebulizer    | 2.1 Bar   |
| Focus       | Active   | Set Capillary         | 3500 V    | Set Dry Heater   | 180 °C    |
| Scan Begin  | 50 m/z   | Set End Plate Offset  | -500 V    | Set Dry Gas      | 7.0 l/min |
| Scan End    | 1000 m/z | Set Collision Cell RF | 800.0 Vpp | Set Divert Valve | Source    |

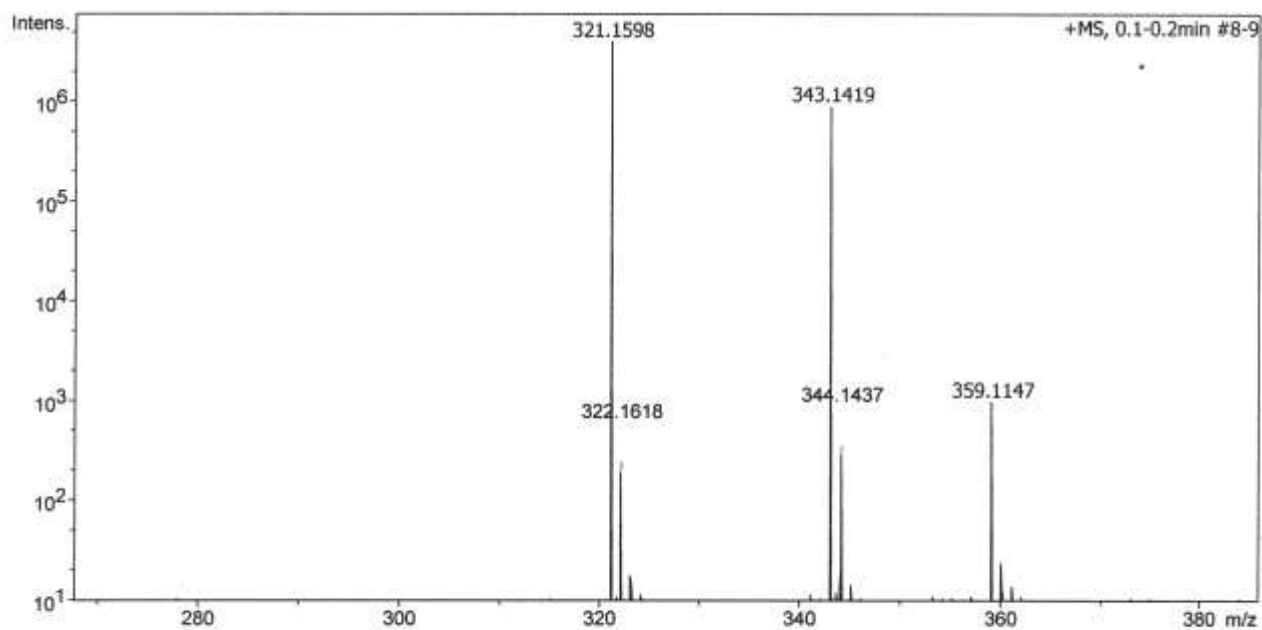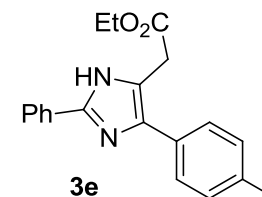

| Meas. m/z | # | Ion Formula | m/z      | err [ppm] | mSigma | # Sigma | Score  | rdb  | e <sup>-</sup> Conf | N-Rule |
|-----------|---|-------------|----------|-----------|--------|---------|--------|------|---------------------|--------|
| 321.1598  | 1 | C20H21N2O2  | 321.1598 | -0.2      | 8.4    | 1       | 100.00 | 11.5 | even                | ok     |

Figure S15. HRMS spectrum of **3e**

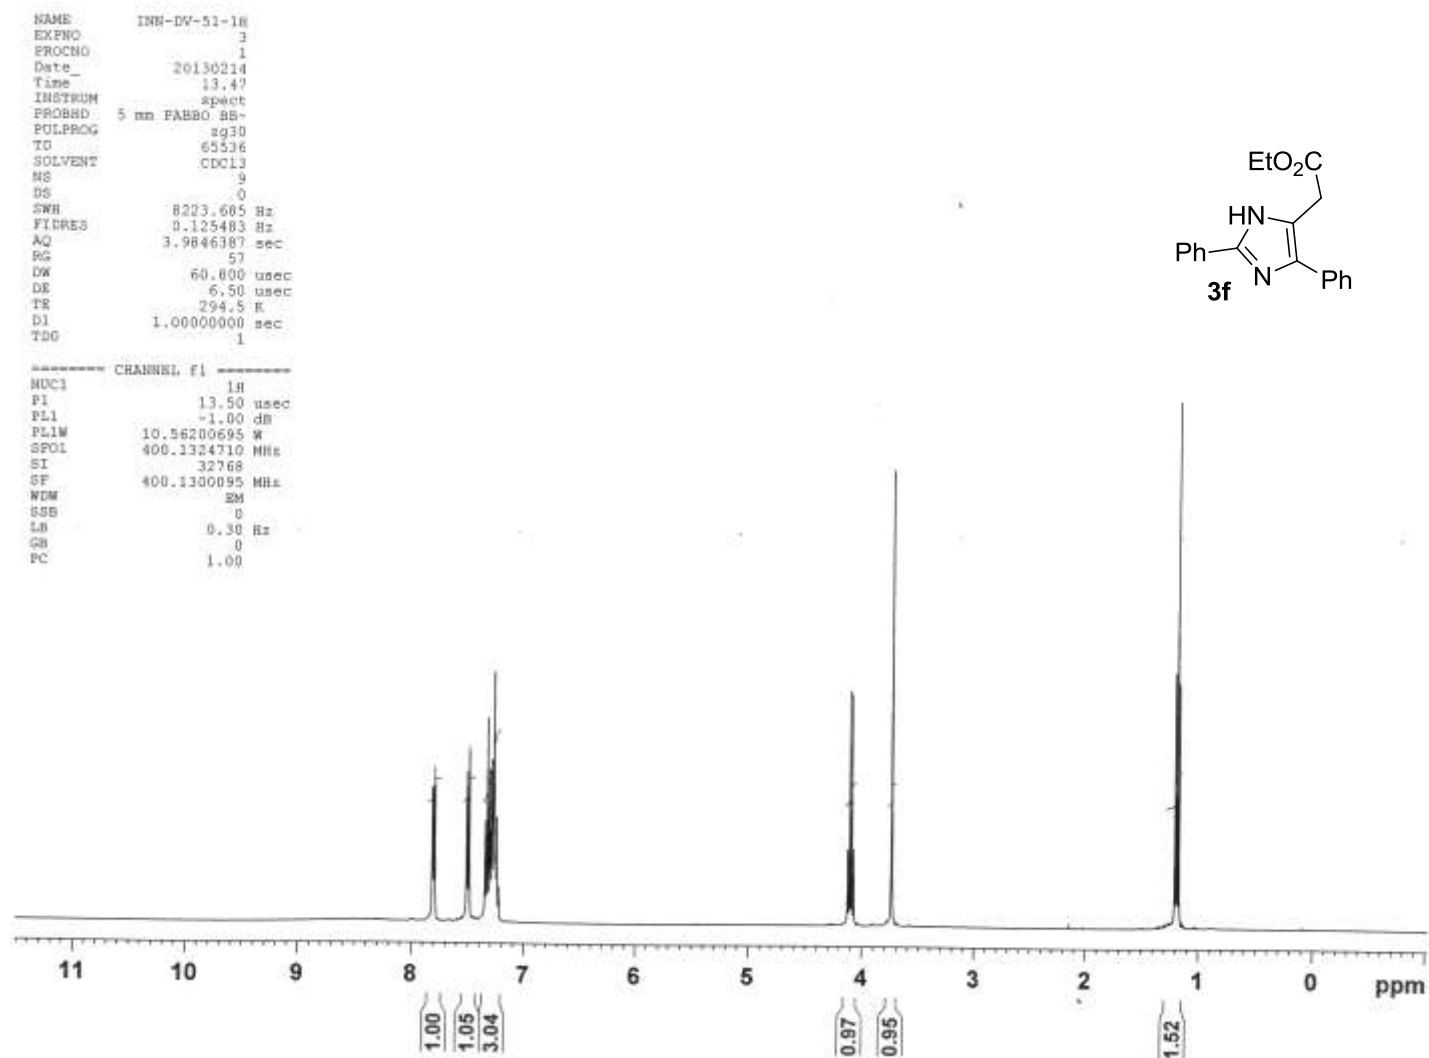

Figure S16.  $^1\text{H}$  NMR spectrum of **3f**

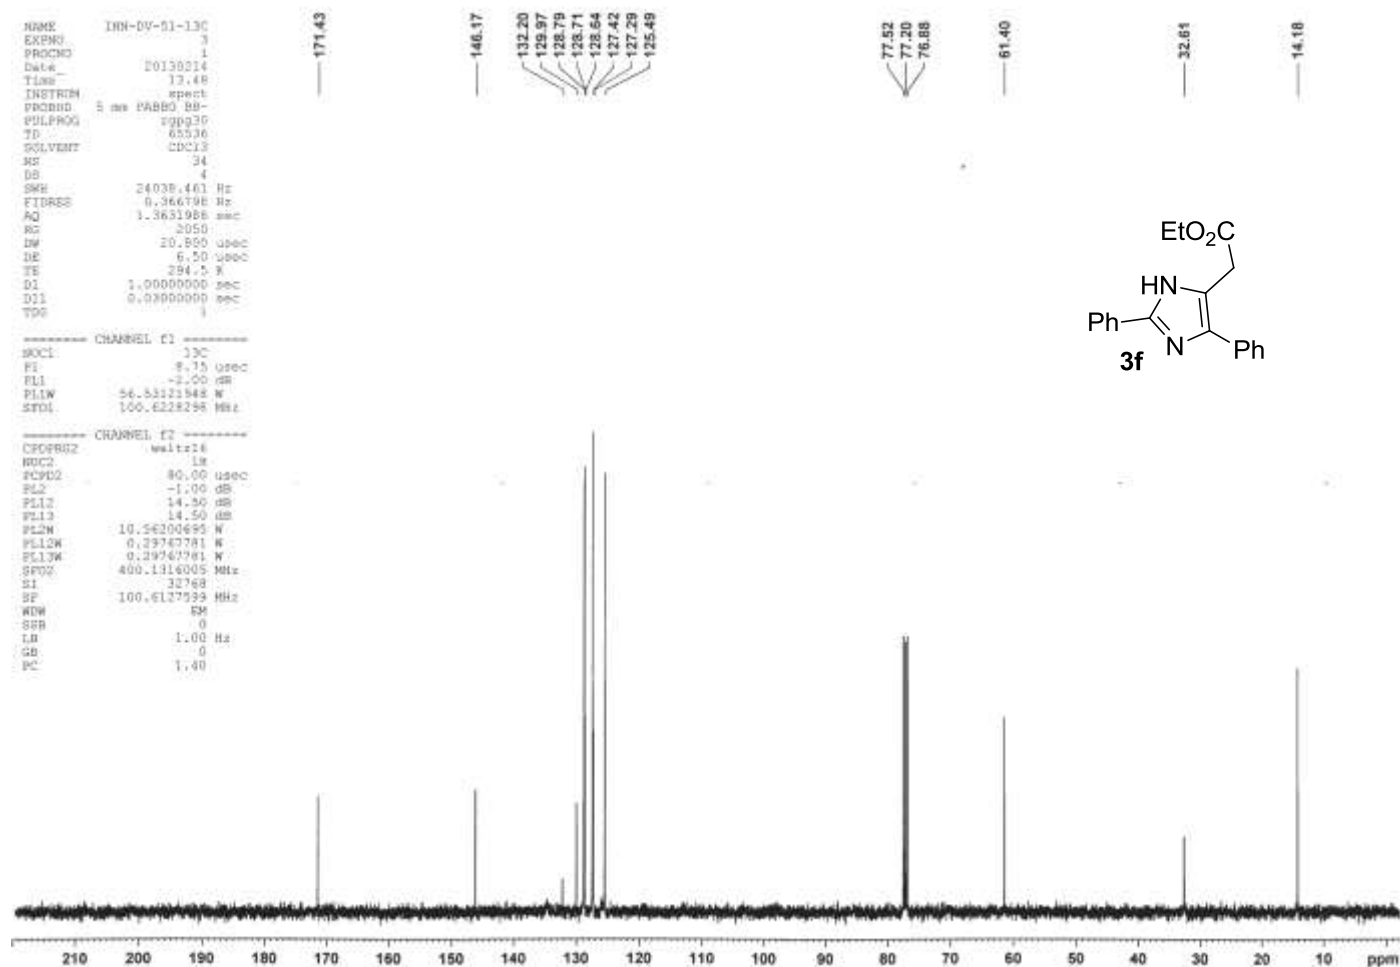

Figure S17. <sup>13</sup>C NMR spectrum of **3f**

# DEPARTMENT OF CHEMISTRY, I.I.T.(B)

## Analysis Info

Analysis Name D:\Data\MAR-13\INN-DV-51.d  
 Method Tune\_pos\_Standard\_NAI-1000.m  
 Sample Name INN-DV-51  
 Comment C19H18N2O2

Acquisition Date 3/6/2013 2:52:18 PM

Operator IIT-B  
 Instrument maXis impact 282001.00081

## Acquisition Parameter

|             |          |                       |           |                  |           |
|-------------|----------|-----------------------|-----------|------------------|-----------|
| Source Type | ESI      | Ion Polarity          | Positive  | Set Nebulizer    | 2.1 Bar   |
| Focus       | Active   | Set Capillary         | 3500 V    | Set Dry Heater   | 180 °C    |
| Scan Begin  | 50 m/z   | Set End Plate Offset  | -500 V    | Set Dry Gas      | 7.0 l/min |
| Scan End    | 1000 m/z | Set Collision Cell RF | 800.0 Vpp | Set Divert Valve | Source    |

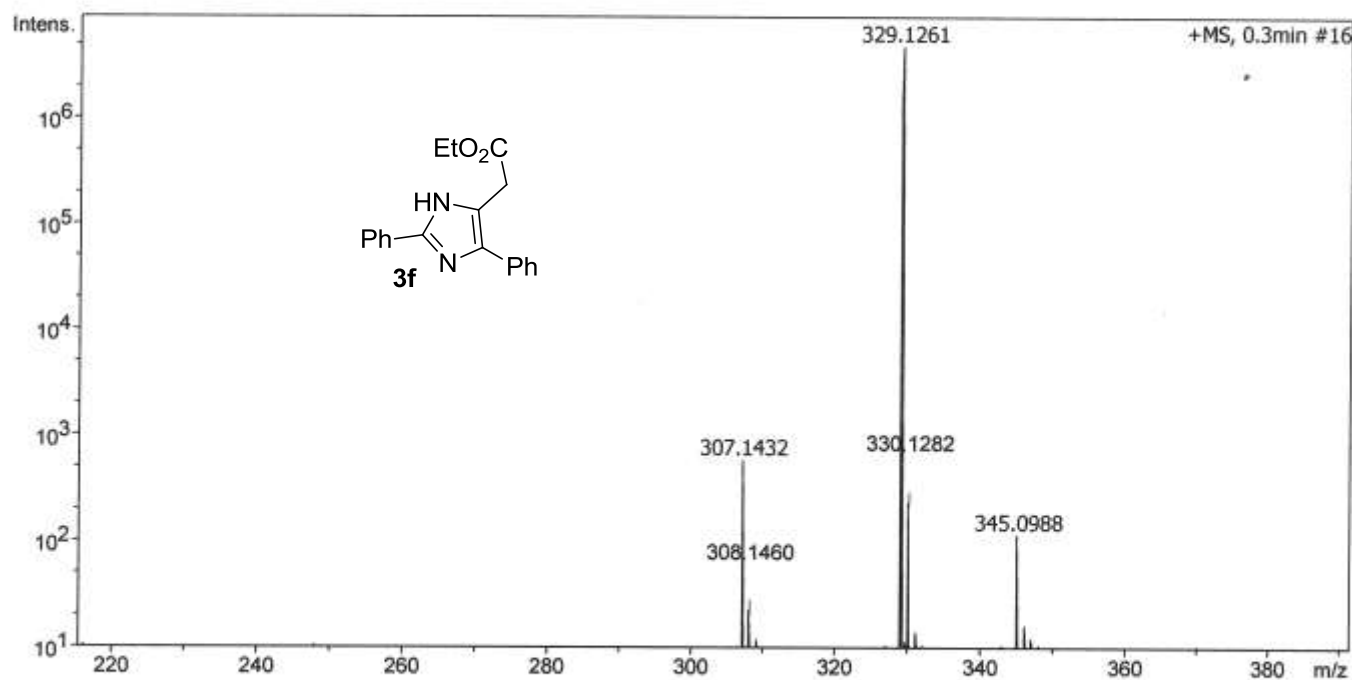

| Meas. m/z | # | Ion Formula  | m/z      | err [ppm] | mSigma | # Sigma | Score  | rdb  | e <sup>-</sup> Conf | N-Rule |
|-----------|---|--------------|----------|-----------|--------|---------|--------|------|---------------------|--------|
| 329.1261  | 1 | C19H18N2NaO2 | 329.1260 | -0.0      | 15.4   | 1       | 100.00 | 11.5 | even                | ok     |

Figure S18. HRMS spectrum of **3f**

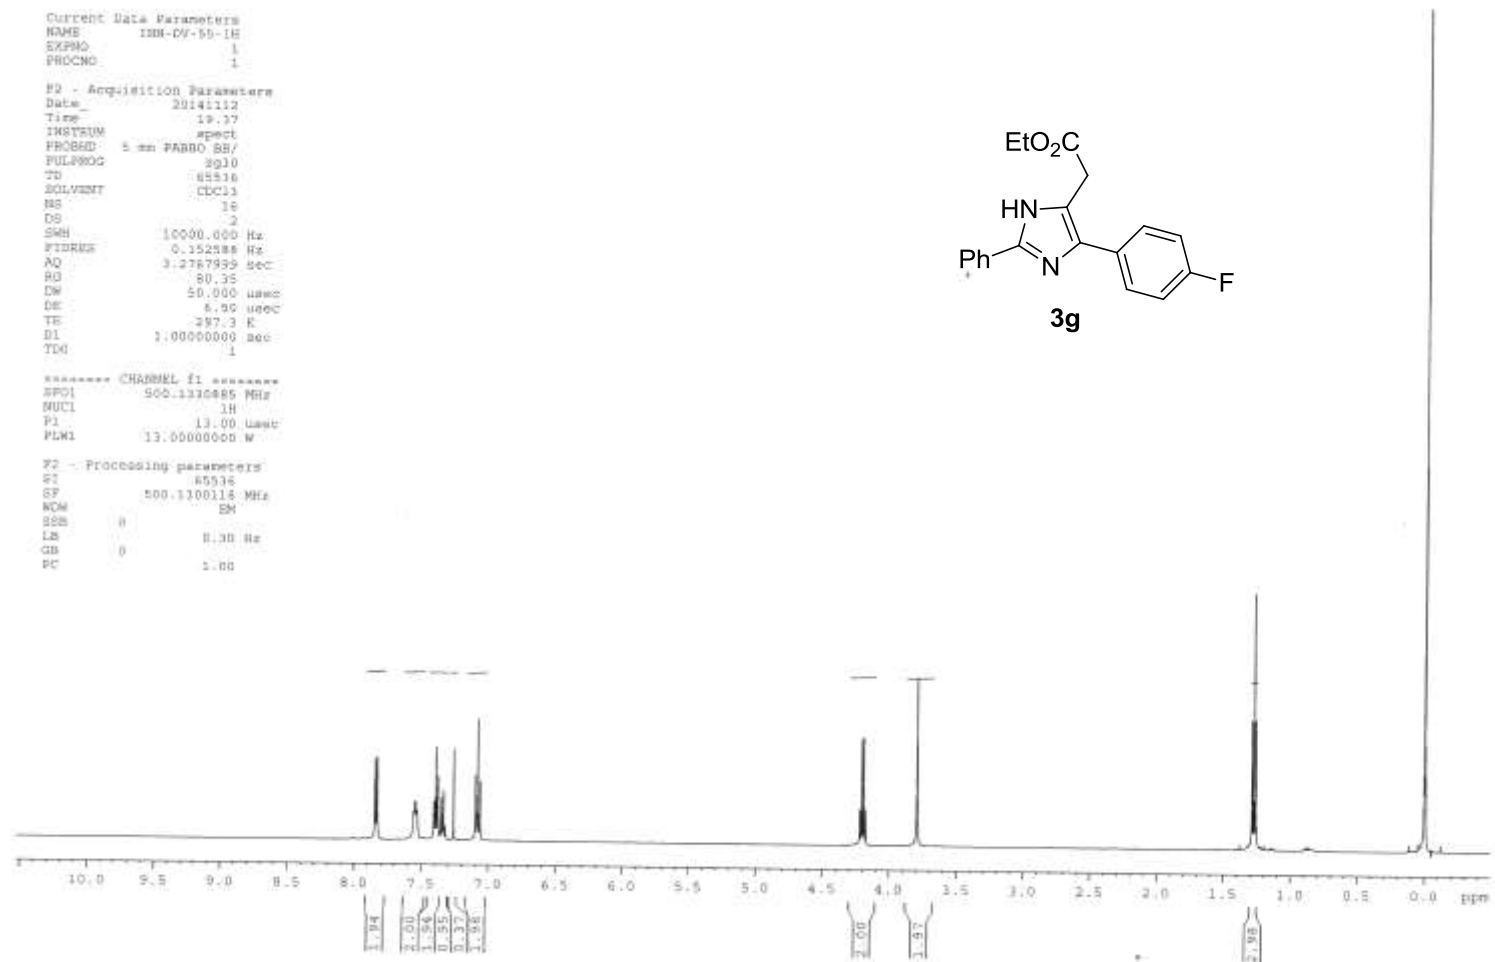

Figure S19.  $^1\text{H}$  NMR spectrum of **3g**

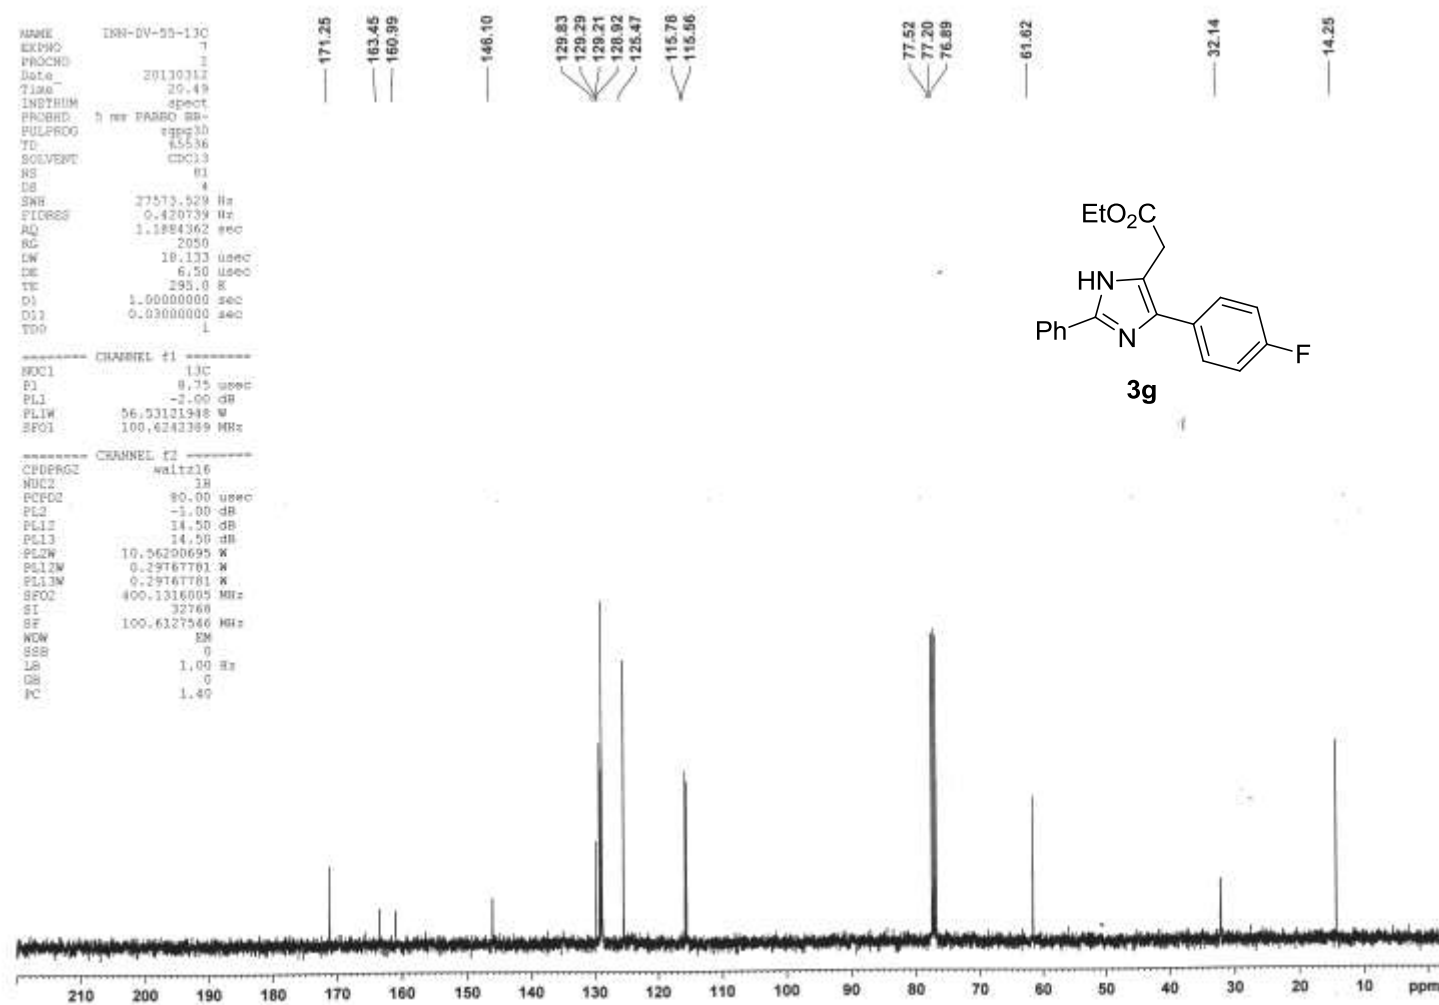

Figure S20. <sup>13</sup>C NMR spectrum of **3g**

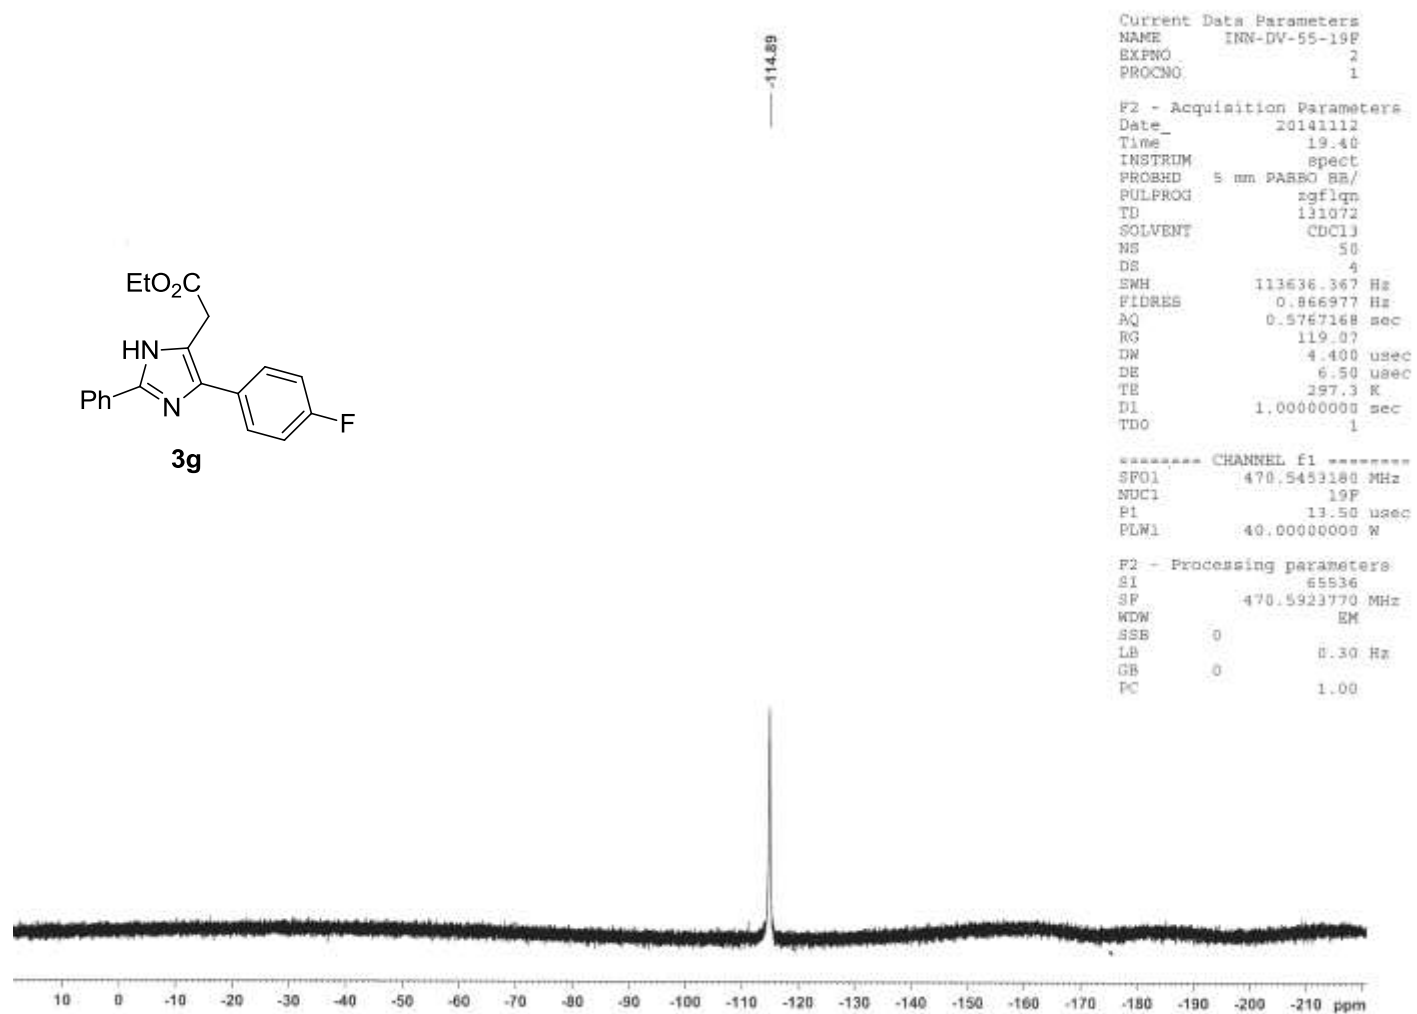

Figure S21.  $^{19}\text{F}$  NMR spectrum of **3g**

# DEPARTMENT OF CHEMISTRY, I.I.T.(B)

## Analysis Info

Analysis Name D:\Data\MAR-13\INN-DV-55.d  
 Method Tune\_pos\_Standard\_NAI-1000.m  
 Sample Name INN-DV-55  
 Comment C19H17FN2O2

Acquisition Date 3/6/2013 3:31:43 PM

Operator IIT-B  
 Instrument maXis impact 282001.00081

## Acquisition Parameter

|             |          |                       |           |                  |           |
|-------------|----------|-----------------------|-----------|------------------|-----------|
| Source Type | ESI      | Ion Polarity          | Positive  | Set Nebulizer    | 2.1 Bar   |
| Focus       | Active   | Set Capillary         | 3500 V    | Set Dry Heater   | 180 °C    |
| Scan Begin  | 50 m/z   | Set End Plate Offset  | -500 V    | Set Dry Gas      | 7.0 l/min |
| Scan End    | 1000 m/z | Set Collision Cell RF | 800.0 Vpp | Set Divert Valve | Source    |

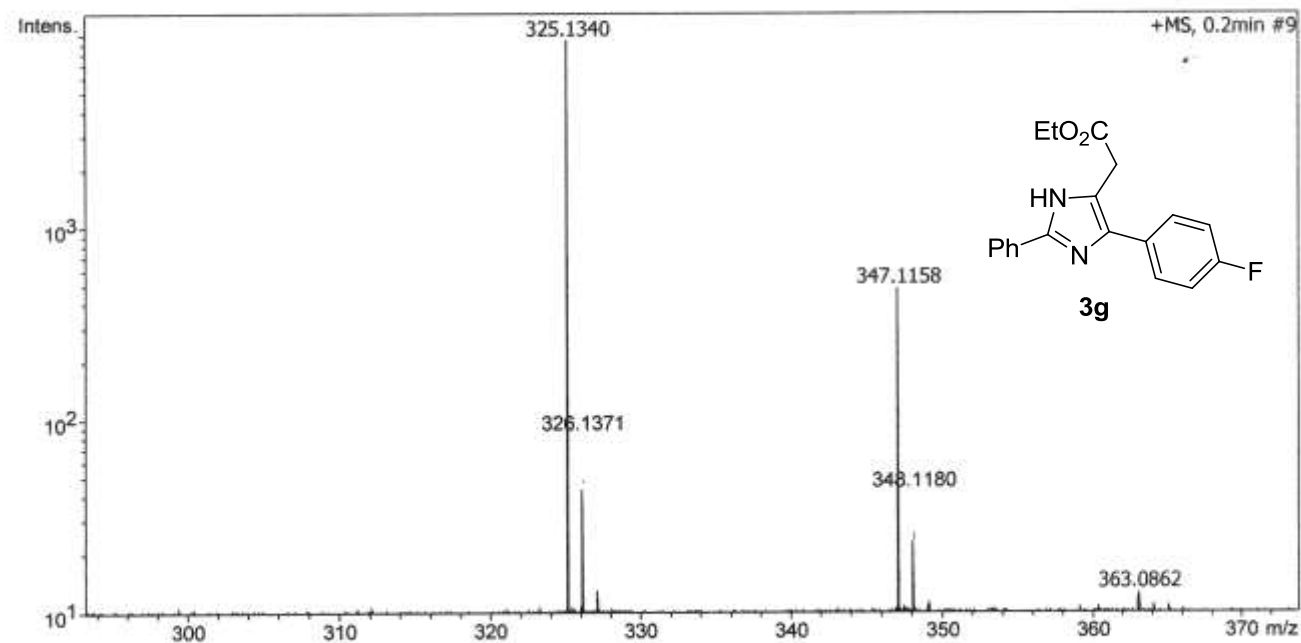

| Meas. m/z | # | Ion Formula | m/z      | err [ppm] | mSigma | # Sigma | Score  | rdb  | e <sup>-</sup> Conf | N-Rule |
|-----------|---|-------------|----------|-----------|--------|---------|--------|------|---------------------|--------|
| 325.1340  | 1 | C19H18FN2O2 | 325.1347 | 2.0       | 7.8    | 1       | 100.00 | 11.5 | even                | ok     |

Figure S22. HRMS spectrum of **3g**

INN-TK-323-1H

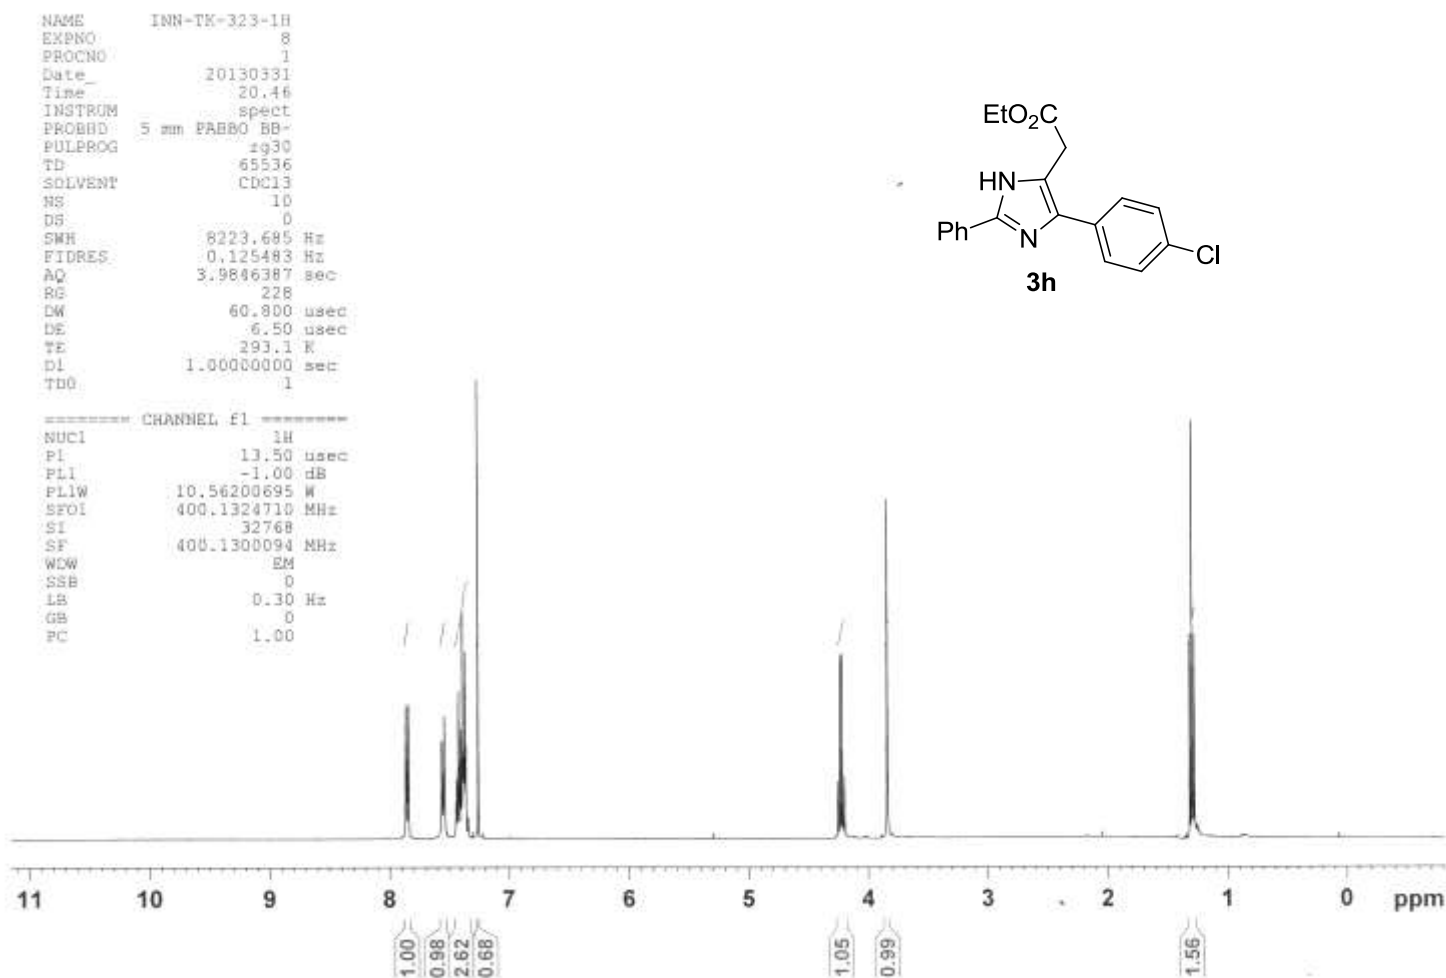

Figure S23.  $^1\text{H}$  NMR spectrum of **3h**

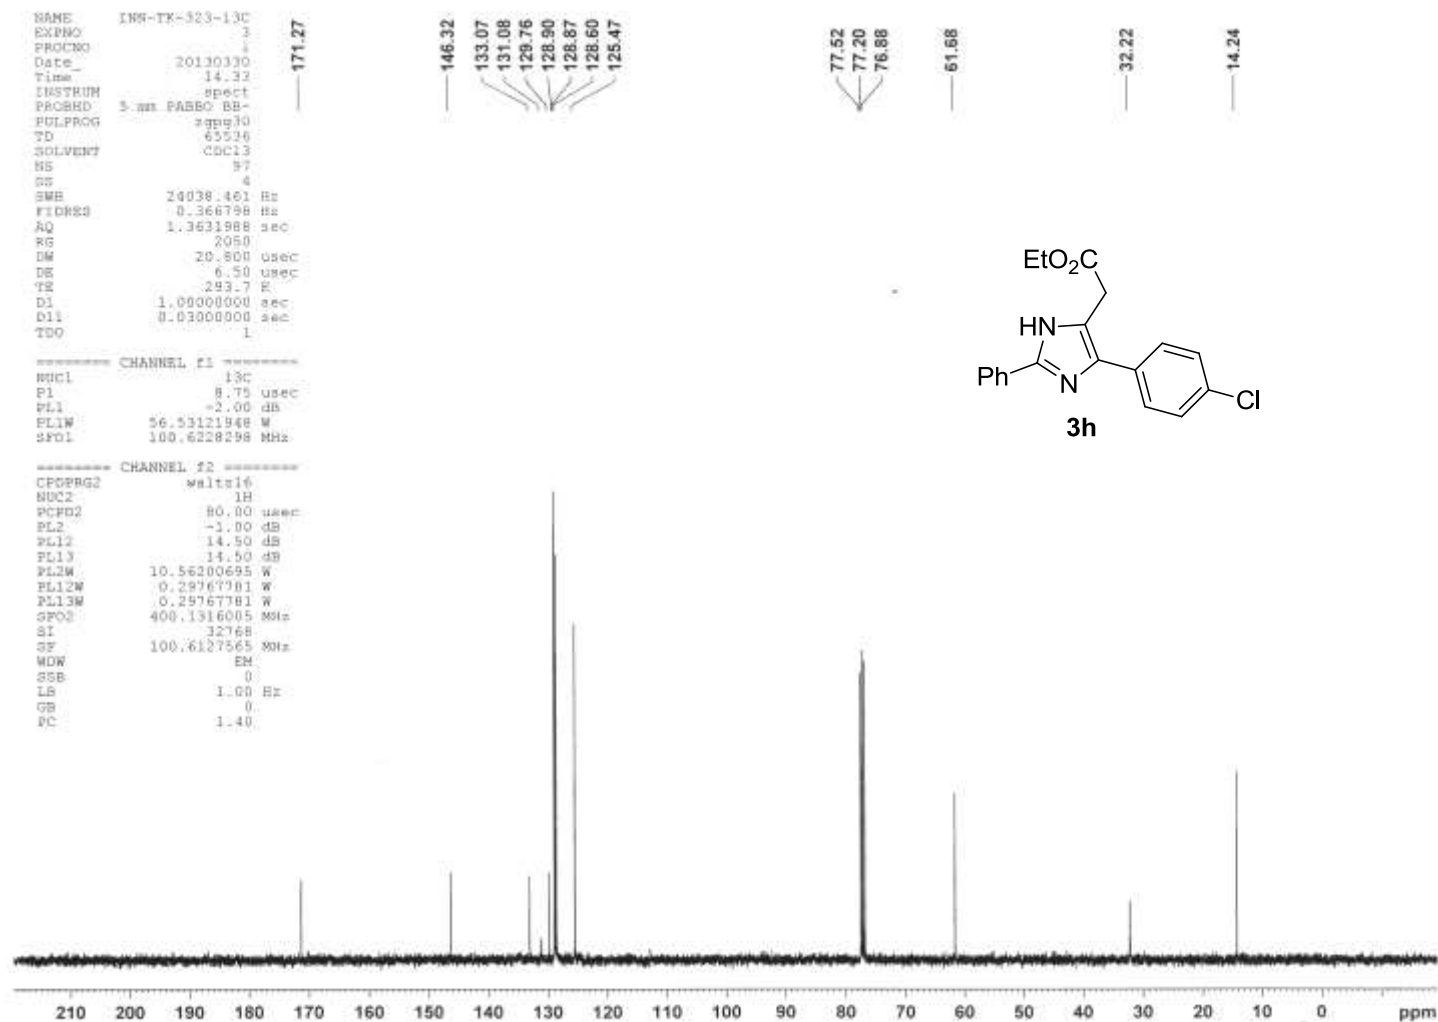

Figure S24.  $^{13}\text{C}$  NMR spectrum of **3h**

## Indian Institute of Technology (B)

### Analysis Info

Analysis Name D:\Data\MAR-13\INN-TK-323.d  
 Method Tune\_pos\_Standard\_NAI-500.m  
 Sample Name INN-TK-323  
 Comment C19H17ClN2O2

Acquisition Date 3/26/2013 6:45:11 PM

Operator IIT-B  
 Instrument maXis impact 282001.00081

### Acquisition Parameter

|             |          |                       |           |                  |           |
|-------------|----------|-----------------------|-----------|------------------|-----------|
| Source Type | ESI      | Ion Polarity          | Positive  | Set Nebulizer    | 2.1 Bar   |
| Focus       | Active   | Set Capillary         | 3200 V    | Set Dry Heater   | 180 °C    |
| Scan Begin  | 50 m/z   | Set End Plate Offset  | -500 V    | Set Dry Gas      | 7.0 l/min |
| Scan End    | 1000 m/z | Set Collision Cell RF | 200.0 Vpp | Set Divert Valve | Source    |

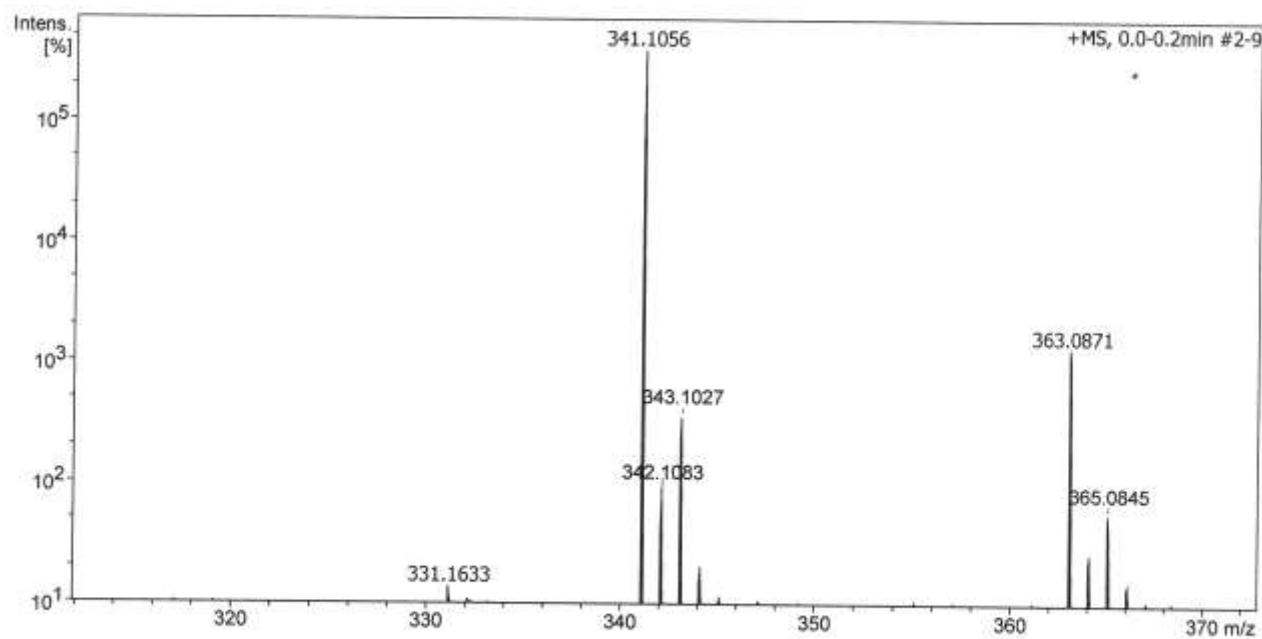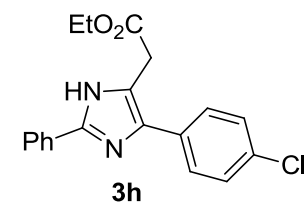

| Meas. m/z | # | Ion Formula  | m/z      | err [ppm] | mSigma | Score  | rdb  | e <sup>-</sup> Conf | N-Rule |
|-----------|---|--------------|----------|-----------|--------|--------|------|---------------------|--------|
| 341.1056  | 1 | C19H18ClN2O2 | 341.1051 | -1.3      | 4.9    | 100.00 | 11.5 | even                | ok     |

Figure S25. HRMS NMR spectrum of **3h**

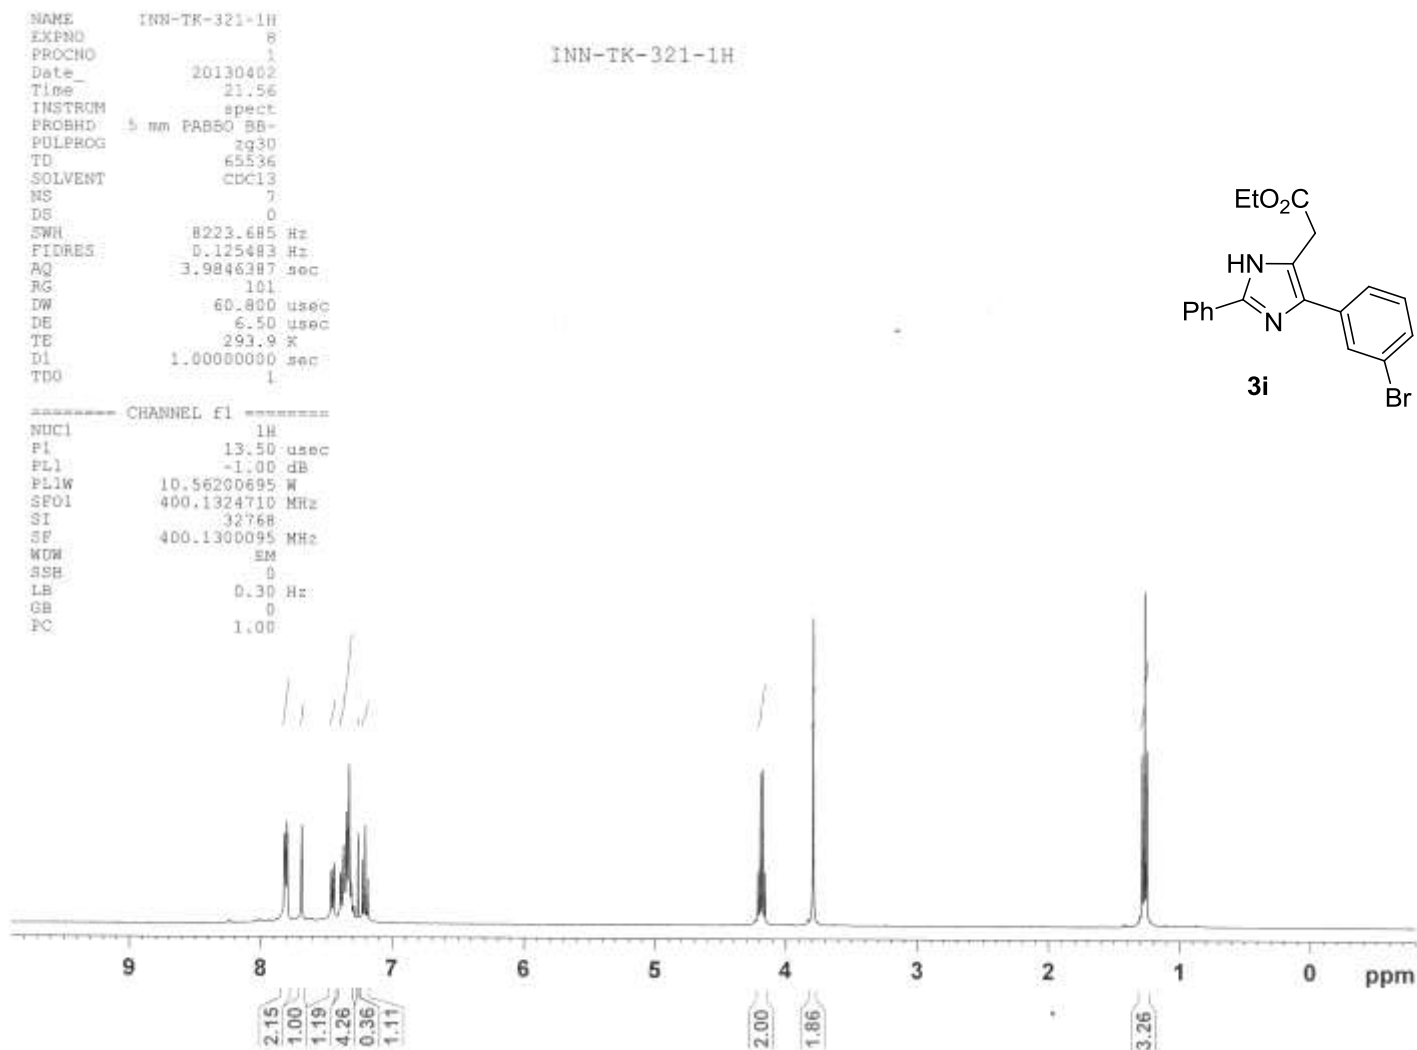

Figure S26.  $^1\text{H}$  NMR spectrum of **3i**

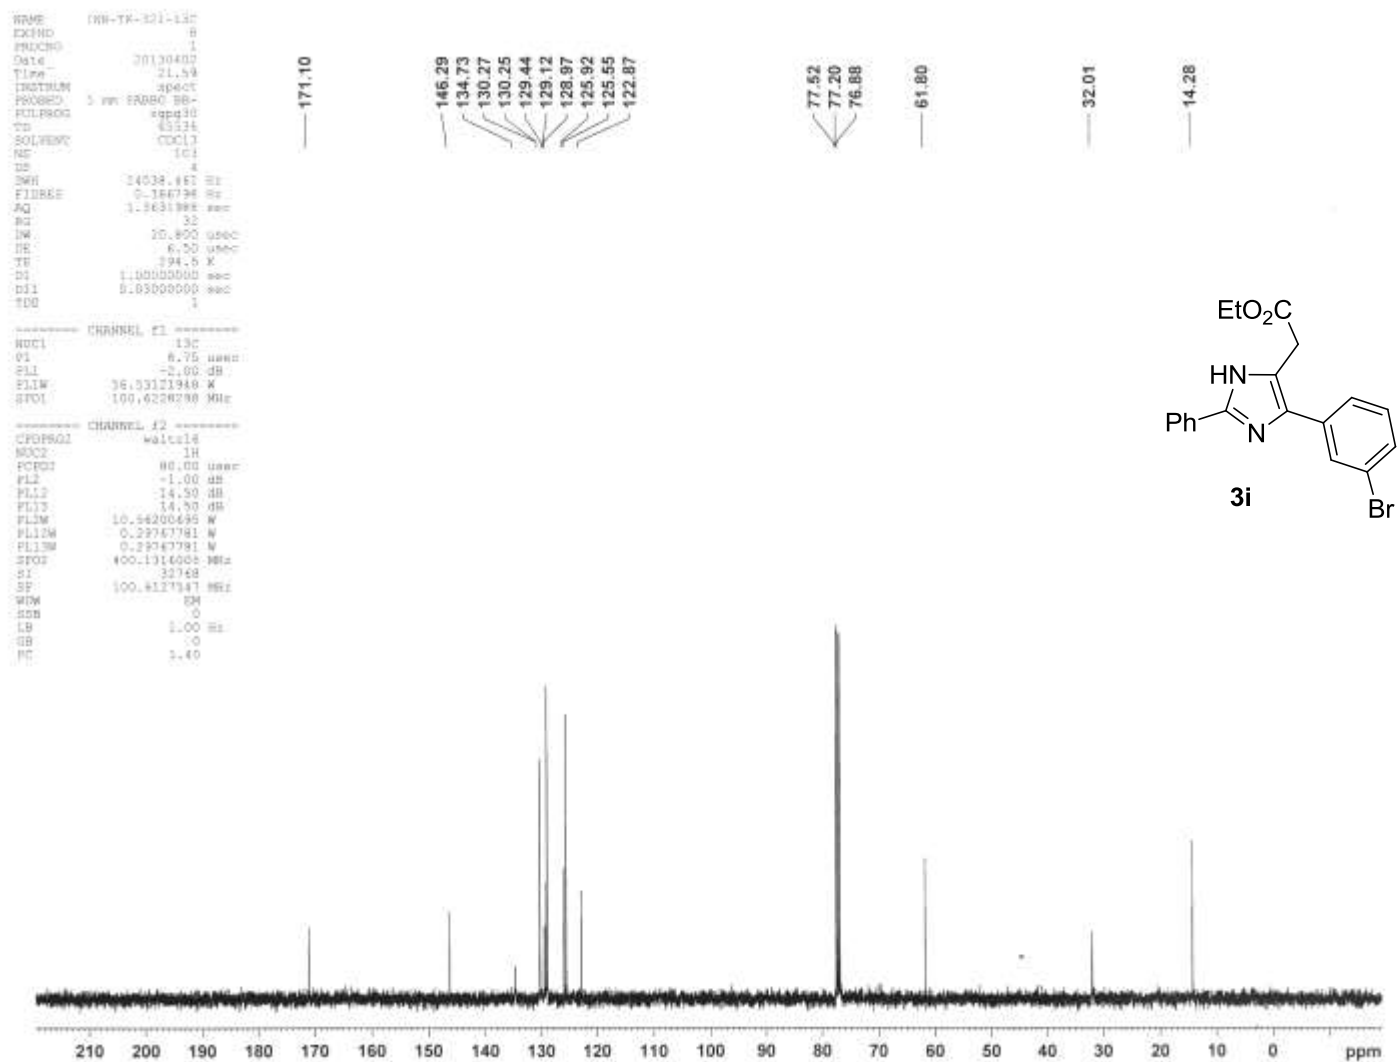

Figure S27. <sup>13</sup>C NMR spectrum of **3i**

# Indian Institute of Technology (B)

## Analysis Info

Analysis Name D:\Data\MAR-13\INN-TK-321.d  
 Method Tune\_pos\_Standard\_NAI-500.m  
 Sample Name INN-TK-321  
 Comment C19H17BrN2O2

Acquisition Date 3/15/2013 3:21:48 PM

Operator IIT-B  
 Instrument maXis impact 282001.00081

## Acquisition Parameter

|             |          |                       |           |                  |           |
|-------------|----------|-----------------------|-----------|------------------|-----------|
| Source Type | ESI      | Ion Polarity          | Positive  | Set Nebulizer    | 2.1 Bar   |
| Focus       | Active   | Set Capillary         | 3200 V    | Set Dry Heater   | 180 °C    |
| Scan Begin  | 50 m/z   | Set End Plate Offset  | -500 V    | Set Dry Gas      | 7.0 l/min |
| Scan End    | 1000 m/z | Set Collision Cell RF | 200.0 Vpp | Set Divert Valve | Source    |

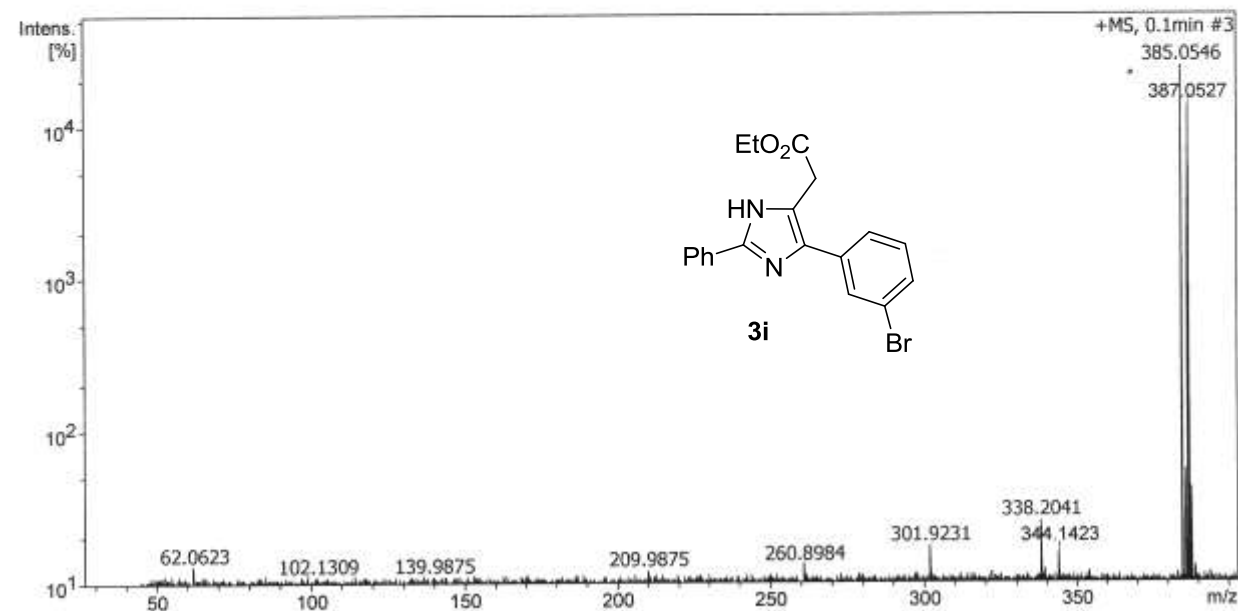

| Meas. m/z | # | Ion Formula  | m/z      | err [ppm] | mSigma | Score | rdb    | e <sup>-</sup> Conf | N-Rule |
|-----------|---|--------------|----------|-----------|--------|-------|--------|---------------------|--------|
| 385.0546  | 1 | C19H18BrN2O2 | 385.0546 | 0.0       | 37.5   | 1     | 100.00 | 11.5 even           | ok     |

Figure S28. HRMS spectrum of **3i**

```

NAME      INN-DM-TK-317-1H
EXPNO     6
PROCNO    1
Date_     20130430
Time      18.55
INSTRUM   spect
PROBHD    5 mm PASPO BB-
PULPROG   zg30
TD        65536
SOLVENT   CDCl3
NS         7
DS         0
SWH        8223.685 Hz
FIDRES     0.125483 Hz
AQ         3.9846387 sec
RG         32
DW         60.800 usec
DE         6.50 usec
TE         295.6 K
D1         1.00000000 sec
TDO        1

```

```

===== CHANNEL f1 =====
NUC1       1H
P1         13.50 usec
PL1        -1.00 dB
PL1W       10.56200695 W
SFO1       400.1324710 MHz
SI         32768
SF         400.1300095 MHz
WDW        EM
SSB        0
LB         0.30 Hz
GB         0
PC         1.00

```

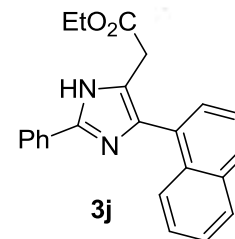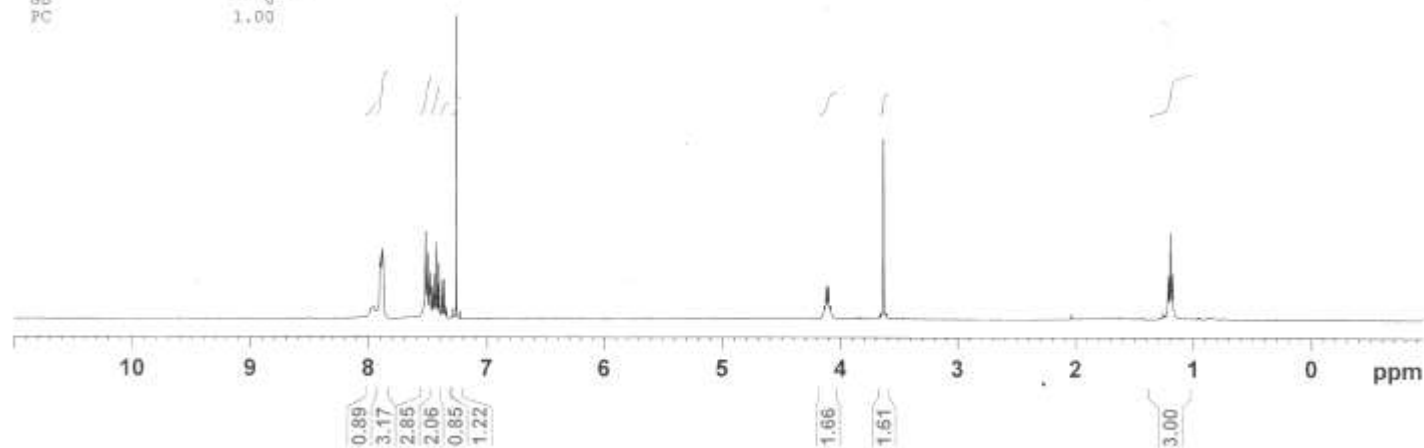

Figure S29.  $^1\text{H}$  NMR spectrum of **3j**

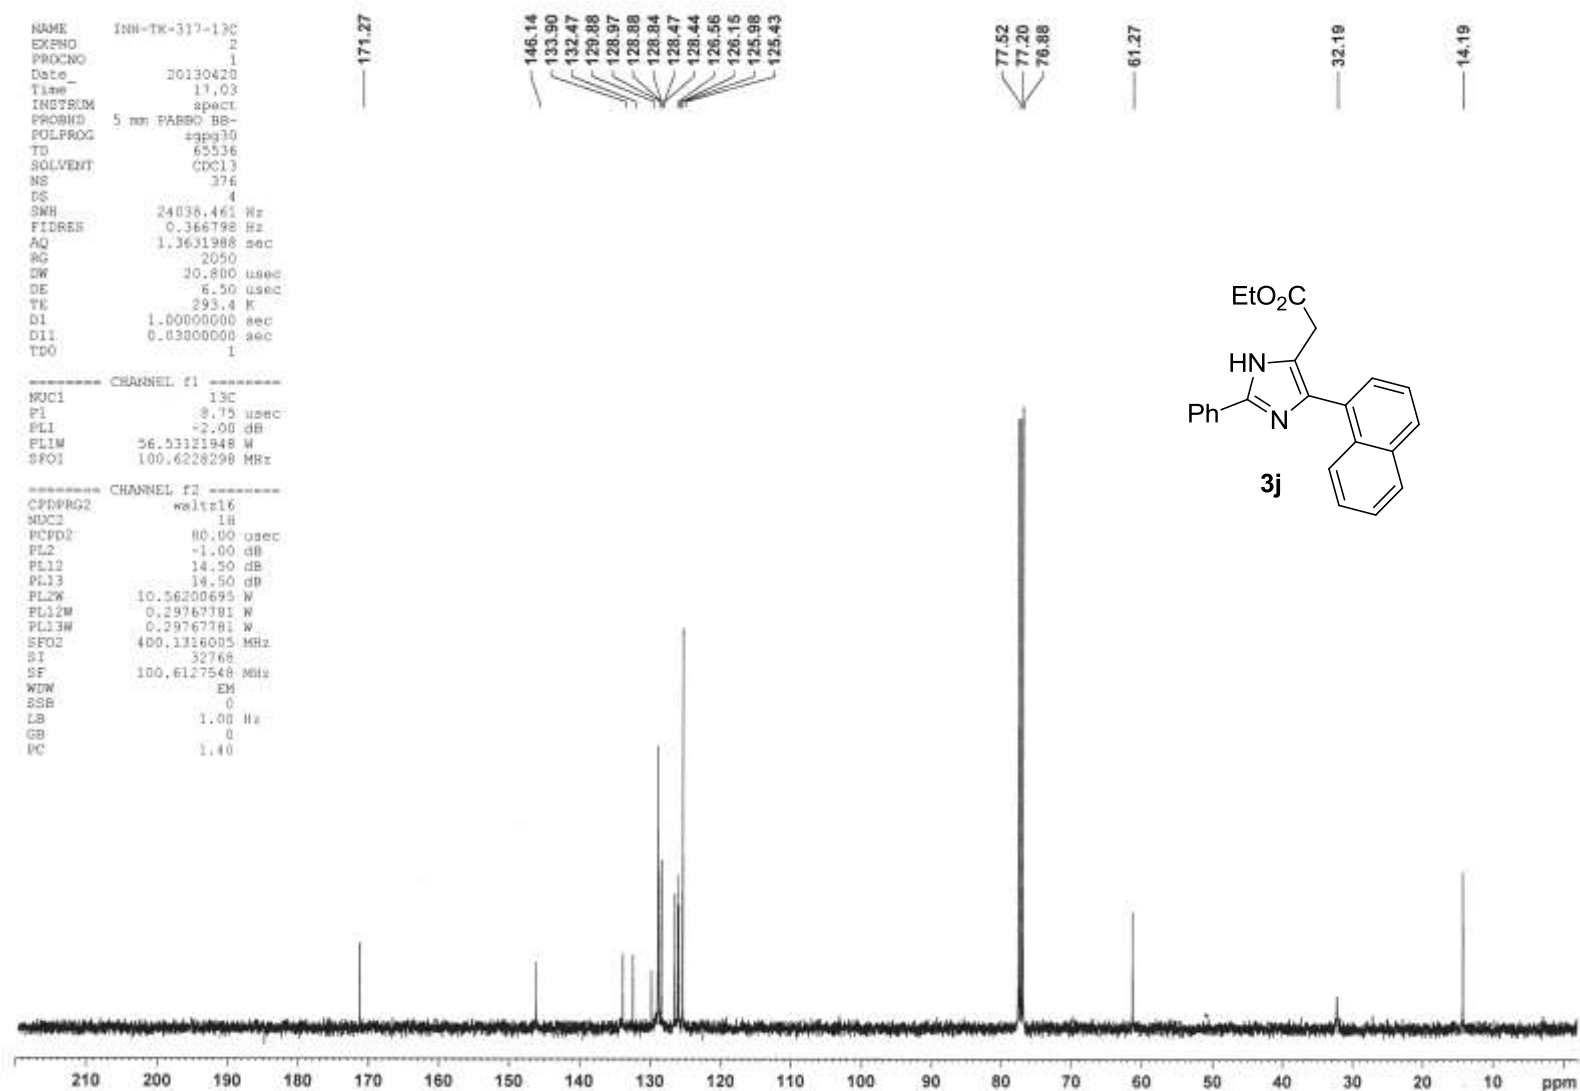

Figure S30. <sup>13</sup>C NMR spectrum of **3j**

# Indian Institute of Technology (B)

## Analysis Info

Analysis Name D:\Data\JUN-13\INN-TK-317.d  
 Method Tune\_pos\_Standard\_NAI-1000.m  
 Sample Name INN-TK-317  
 Comment C23H20N2O2

Acquisition Date 6/10/2013 6:14:03 PM

Operator IIT-B  
 Instrument maXis impact 282001.00081

## Acquisition Parameter

|             |          |                       |           |                  |           |
|-------------|----------|-----------------------|-----------|------------------|-----------|
| Source Type | ESI      | Ion Polarity          | Positive  | Set Nebulizer    | 2.1 Bar   |
| Focus       | Active   | Set Capillary         | 3500 V    | Set Dry Heater   | 180 °C    |
| Scan Begin  | 50 m/z   | Set End Plate Offset  | -500 V    | Set Dry Gas      | 7.0 l/min |
| Scan End    | 1000 m/z | Set Collision Cell RF | 400.0 Vpp | Set Divert Valve | Source    |

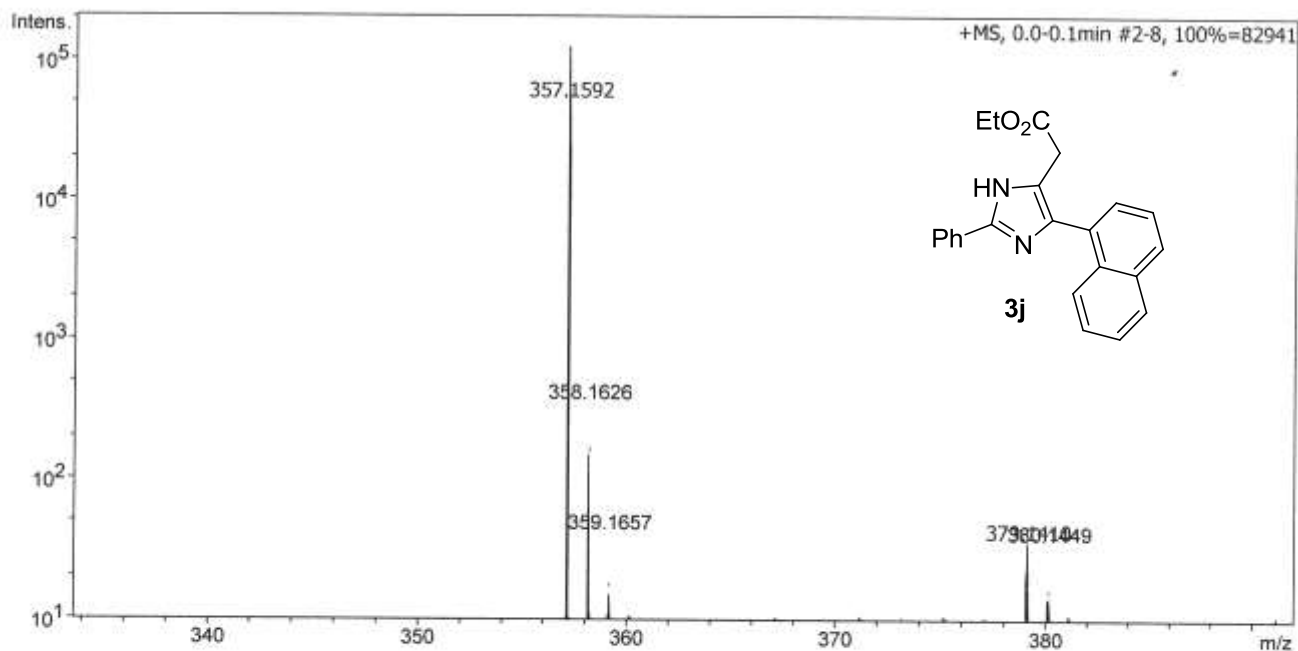

| Meas. m/z | # | Ion Formula | m/z      | err [ppm] | mSigma | # Sigma | Score  | rdb  | e <sup>-</sup> Conf | N-Rule |
|-----------|---|-------------|----------|-----------|--------|---------|--------|------|---------------------|--------|
| 357.1592  | 1 | C23H21N2O2  | 357.1598 | -1.5      | 29.2   | 1       | 100.00 | 14.5 | even                | ok     |

Figure S31. HRMS spectrum of **3j**

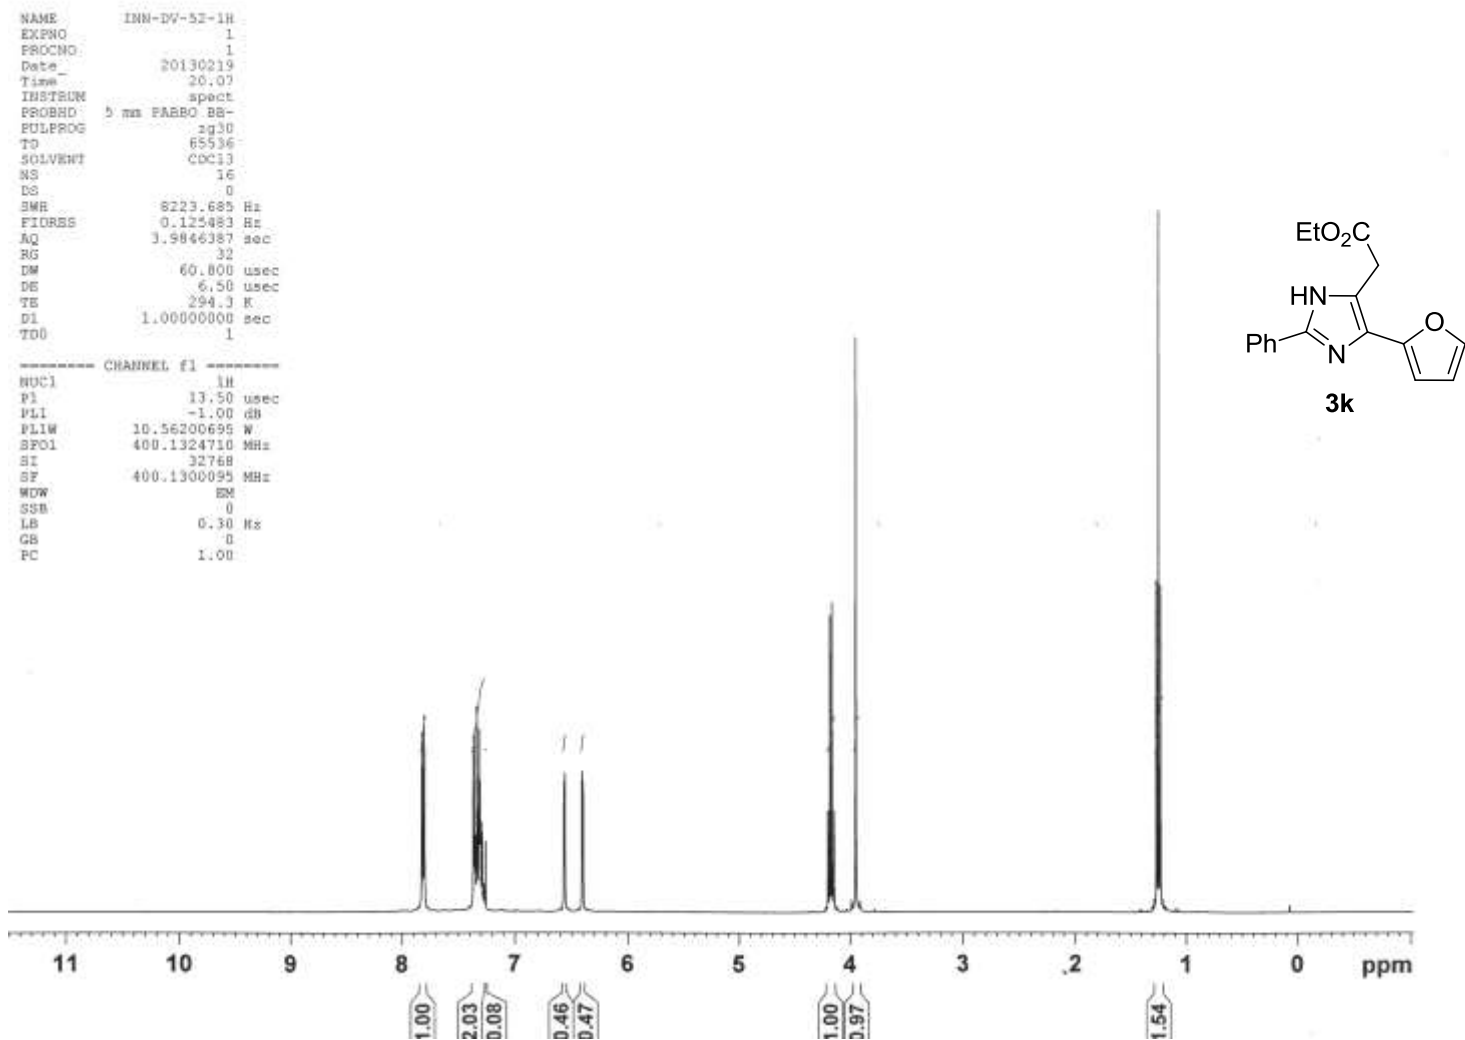

Figure S32. <sup>1</sup>H NMR spectrum of **3k**

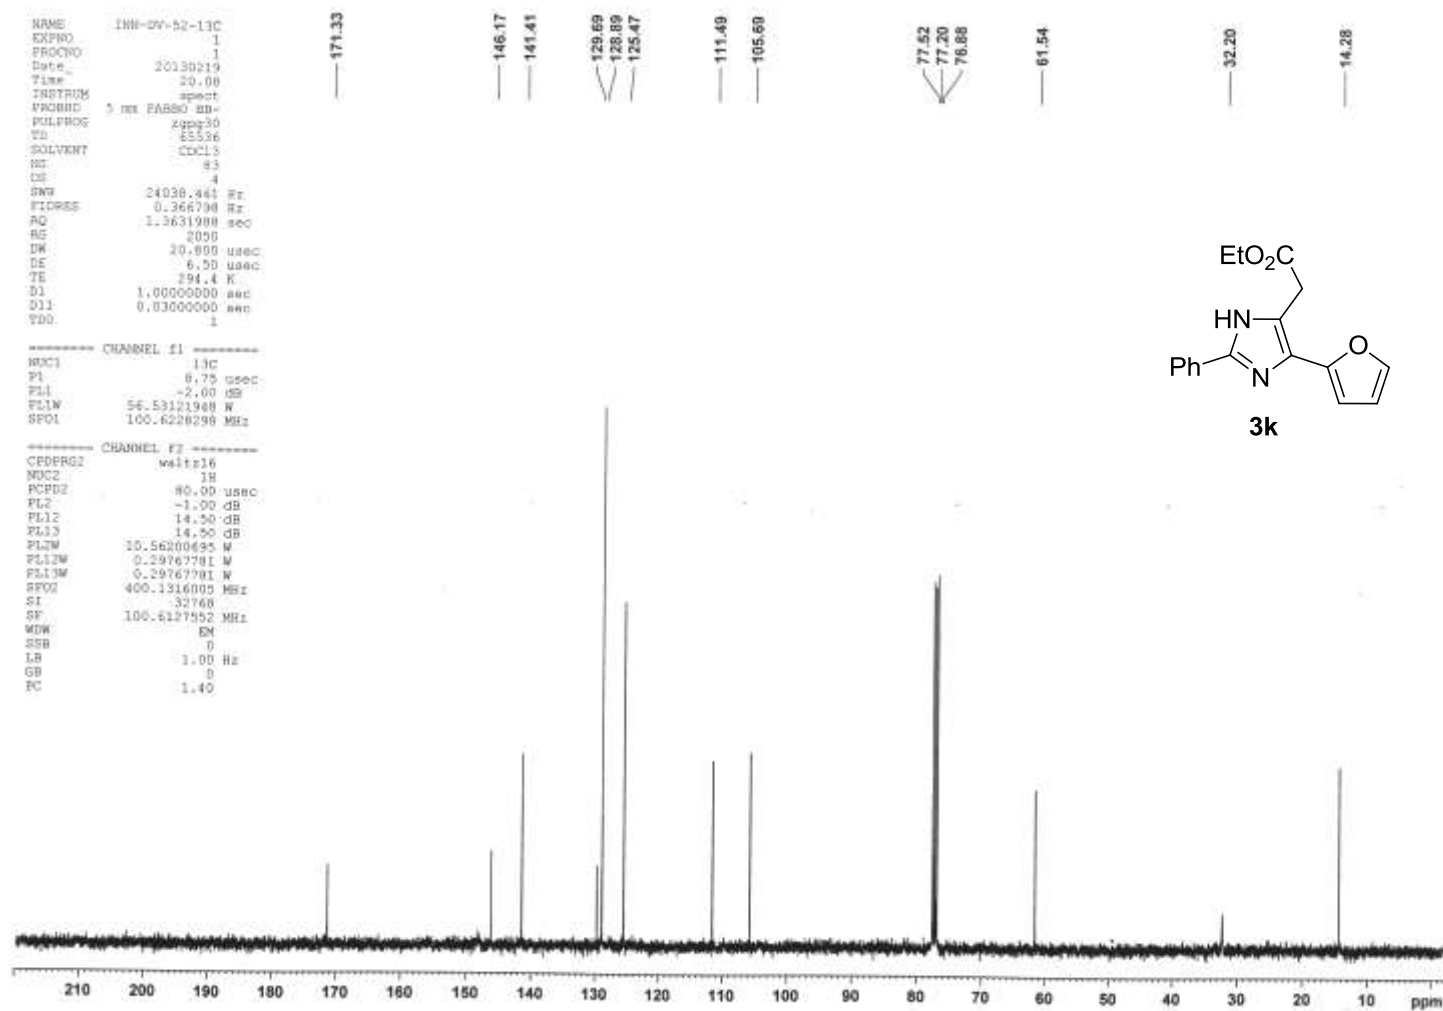

Figure S33. <sup>13</sup>C NMR spectrum of **3k**

# DEPARTMENT OF CHEMISTRY, I.I.T.(B)

## Analysis Info

Analysis Name D:\Data\MAR-13\INN-DV-52.d  
 Method Tune\_pos\_Standard\_NAI-1000.m  
 Sample Name INN-DV-52  
 Comment C17H16N2O3

Acquisition Date 3/6/2013 3:08:08 PM

Operator IIT-B  
 Instrument maXis impact 282001.00081

## Acquisition Parameter

|             |          |                       |           |                  |           |
|-------------|----------|-----------------------|-----------|------------------|-----------|
| Source Type | ESI      | Ion Polarity          | Positive  | Set Nebulizer    | 2.1 Bar   |
| Focus       | Active   | Set Capillary         | 3500 V    | Set Dry Heater   | 180 °C    |
| Scan Begin  | 50 m/z   | Set End Plate Offset  | -500 V    | Set Dry Gas      | 7.0 l/min |
| Scan End    | 1000 m/z | Set Collision Cell RF | 800.0 Vpp | Set Divert Valve | Source    |

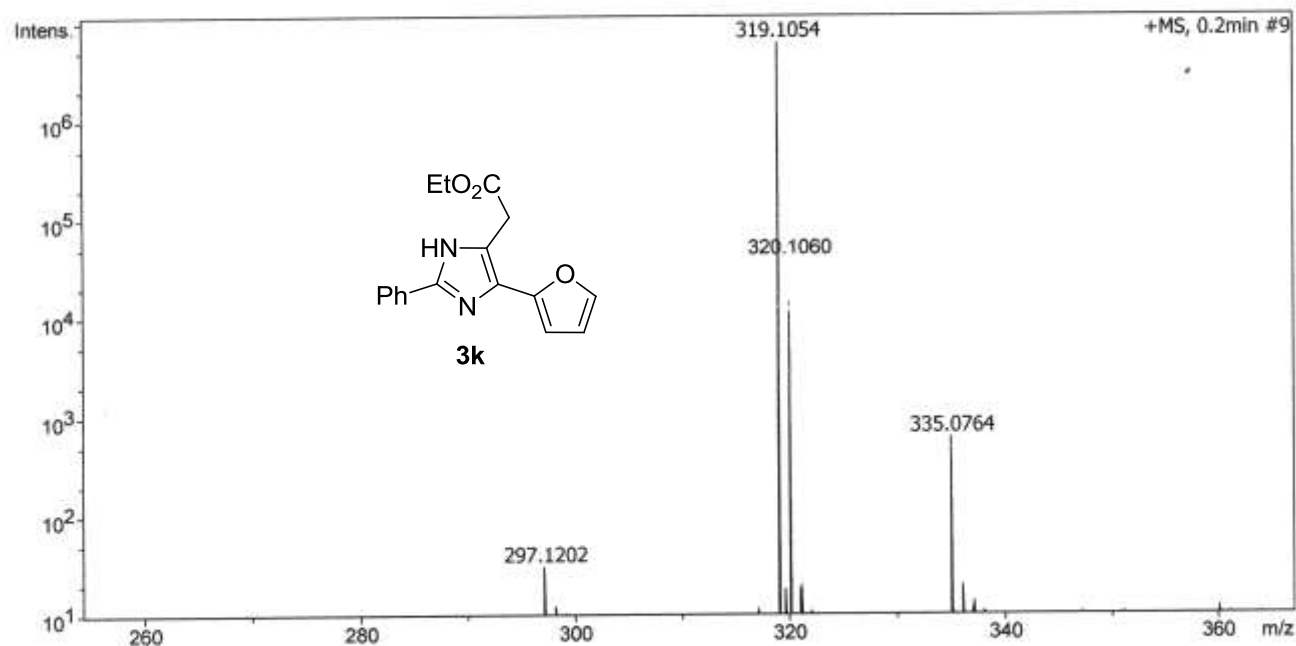

| Meas. m/z | # | Ion Formula  | m/z      | err [ppm] | mSigma | # Sigma | Score  | rdb  | e <sup>-</sup> Conf | N-Rule |
|-----------|---|--------------|----------|-----------|--------|---------|--------|------|---------------------|--------|
| 319.1054  | 1 | C17H16N2NaO3 | 319.1053 | -0.2      | 195.2  | 1       | 100.00 | 10.5 | even                | ok     |

Figure S34. HRMS spectrum of **3k**

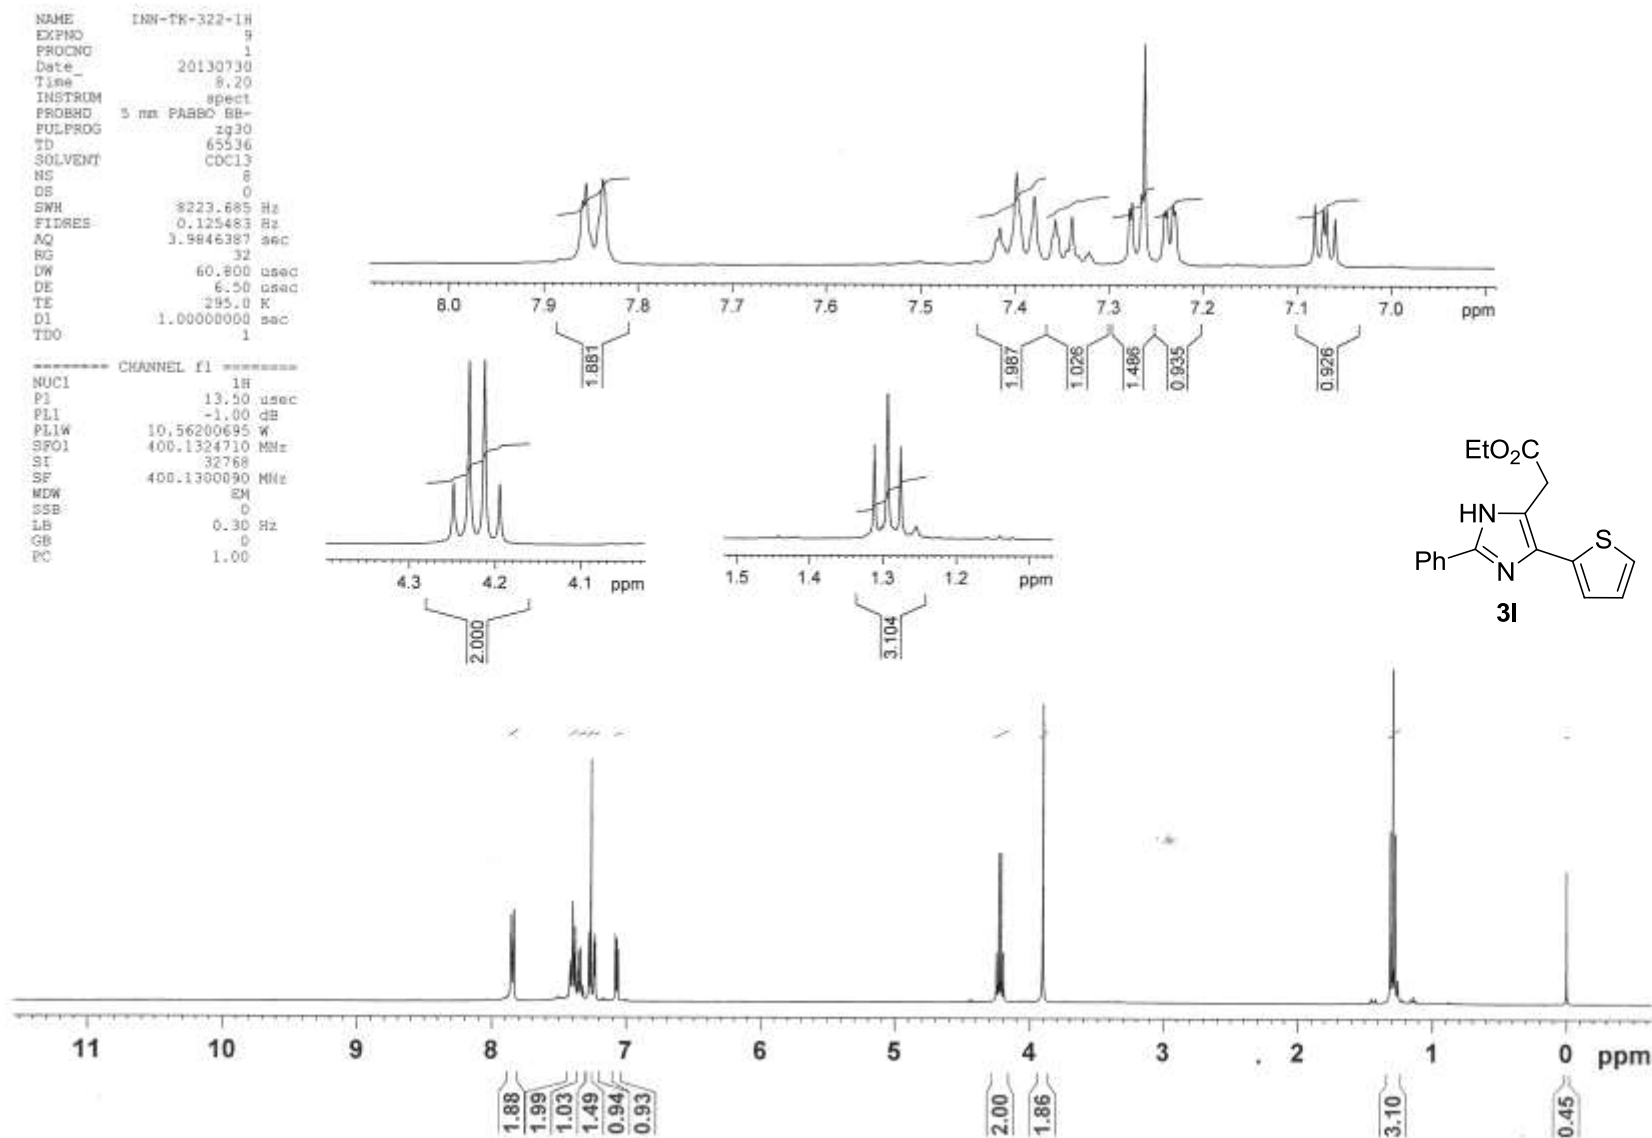

Figure S35.  $^1\text{H}$  NMR spectrum of **3I**

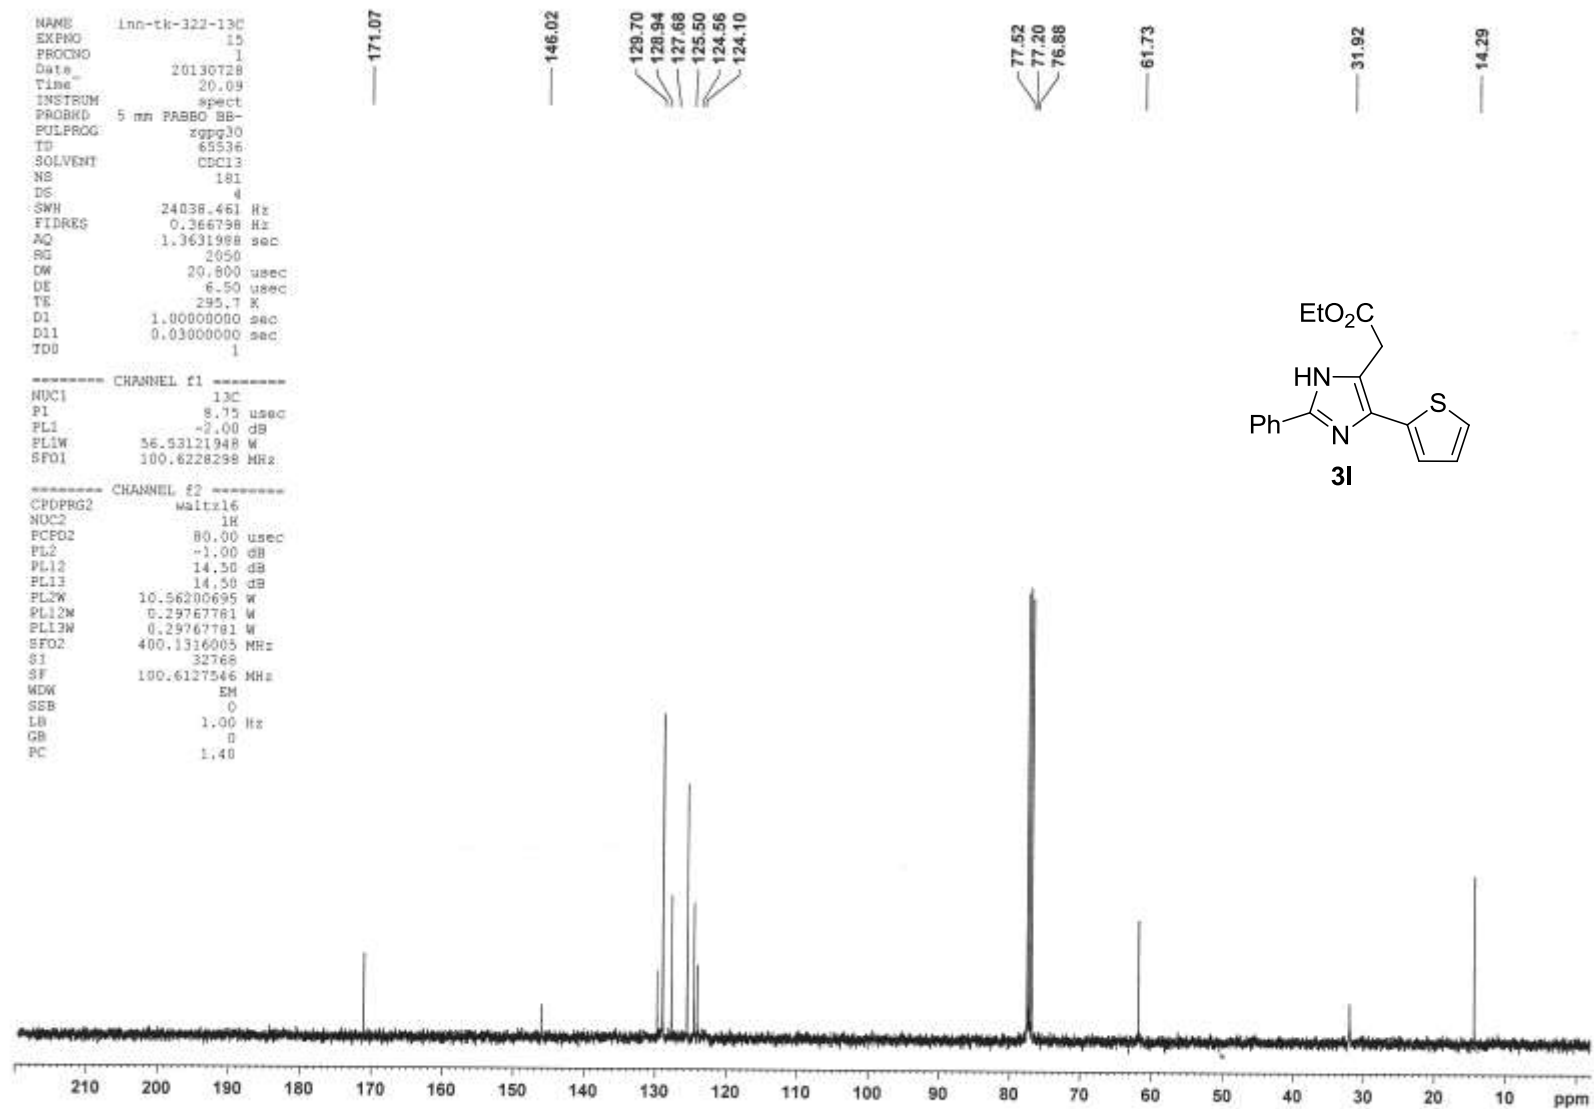

Figure S36. <sup>13</sup>C NMR spectrum of **3l**

# Indian Institute of Technology (B)

## Analysis Info

Analysis Name D:\Data\MAR-13\INN-TK-322.d  
 Method Tune\_pos\_Standard\_NAI-500.m  
 Sample Name INN-TK-322  
 Comment C17H16N2O2S

Acquisition Date 3/26/2013 6:52:30 PM

Operator IIT-B  
 Instrument maXis impact 282001.00081

## Acquisition Parameter

|             |          |                       |           |                  |           |
|-------------|----------|-----------------------|-----------|------------------|-----------|
| Source Type | ESI      | Ion Polarity          | Positive  | Set Nebulizer    | 2.1 Bar   |
| Focus       | Active   | Set Capillary         | 3200 V    | Set Dry Heater   | 180 °C    |
| Scan Begin  | 50 m/z   | Set End Plate Offset  | -500 V    | Set Dry Gas      | 7.0 l/min |
| Scan End    | 1000 m/z | Set Collision Cell RF | 200.0 Vpp | Set Divert Valve | Source    |

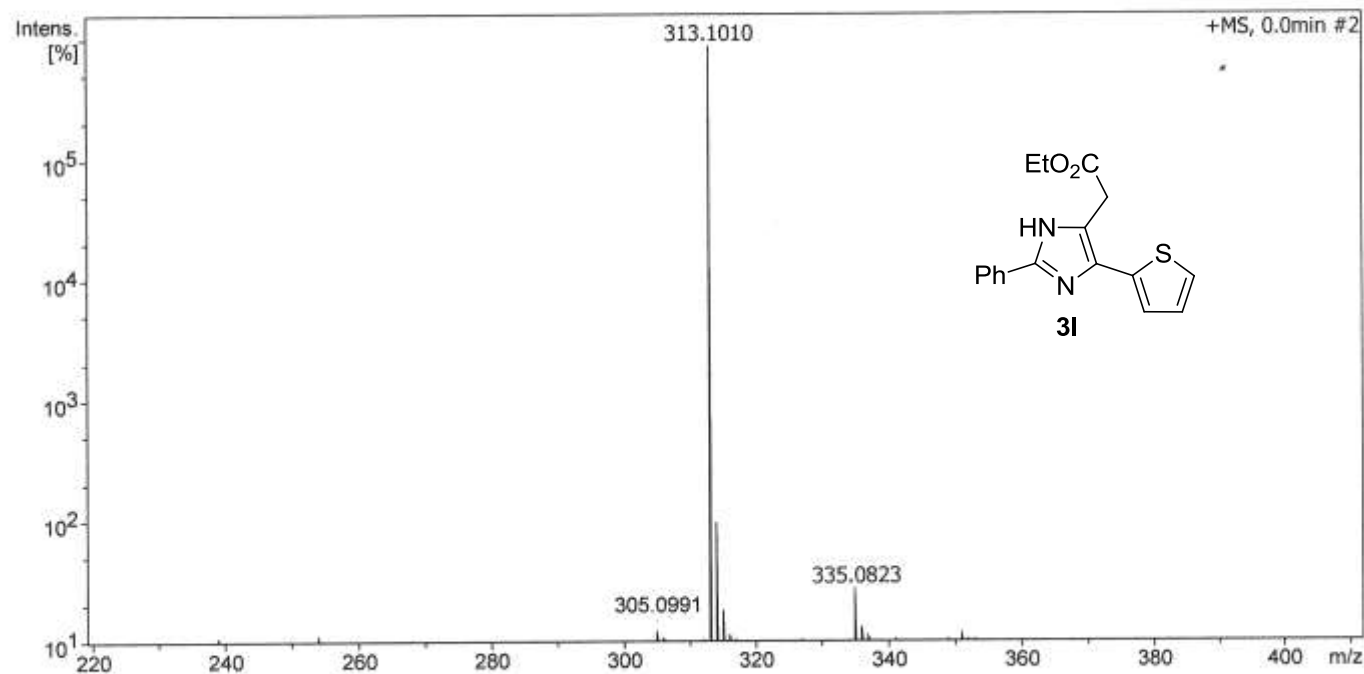

| Meas. m/z | # | Ion Formula | m/z      | err [ppm] | mSigma | Score | rdb    | e <sup>-</sup> Conf | N-Rule  |
|-----------|---|-------------|----------|-----------|--------|-------|--------|---------------------|---------|
| 313.1010  | 1 | C17H17N2O2S | 313.1005 | -1.5      | 7.6    | 1     | 100.00 | 10.5                | even ok |

Figure S37. HRMS spectrum of **3I**

```

NAME      inn-tk-328-1a
EXPNO     1
PROCNO    1
Date_     20130827
Time      13.33
INSTRUM   spect
PROBHD    5 mm SEI 1H/D-
PULPROG   zg30
TD        49340
SOLVENT   CDCl3
NS        8
DS        0
SMH       8223.685 Hz
FIDRES    0.166674 Hz
AQ        2.9999220 sec
RG        71.8
DM        60.800 usec
DE        6.50 usec
TE        293.2 K
D1        1.00000000 sec
TDO       1

```

```

===== CHANNEL f1 =====
NUC1      1H
P1        6.75 usec
PL1       -3.00 dB
PL1W      16.73965454 W
SF01      400.1324710 MHz
SI        32768
SF        400.1300124 MHz
WDW       EM
SSB       0
LB        0.30 Hz
GB        0
PC        1.00

```

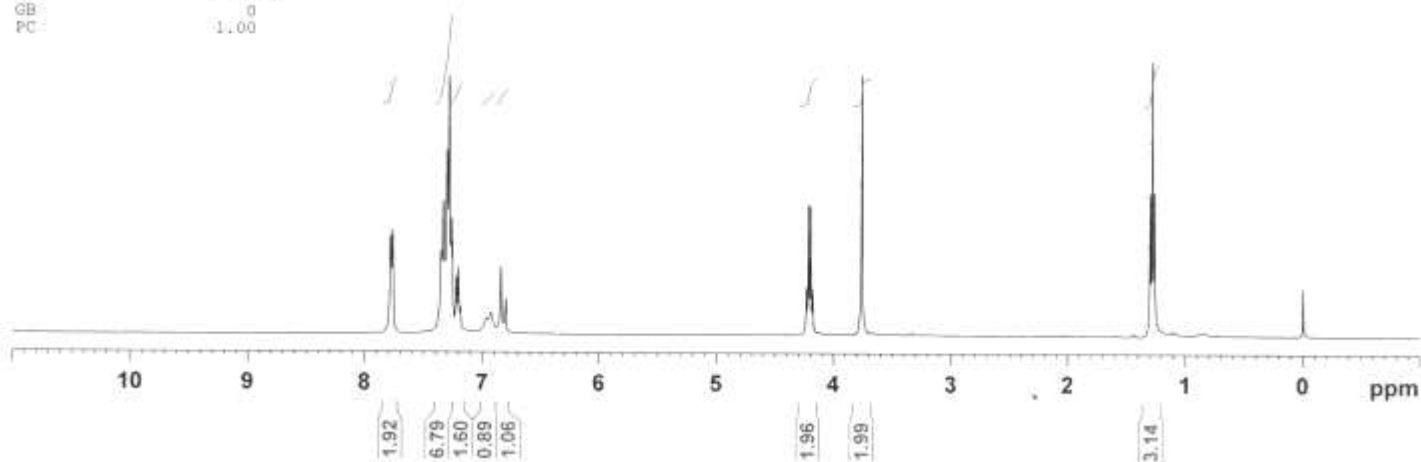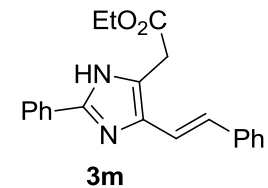

Figure S38. <sup>1</sup>H NMR spectrum of **3m**

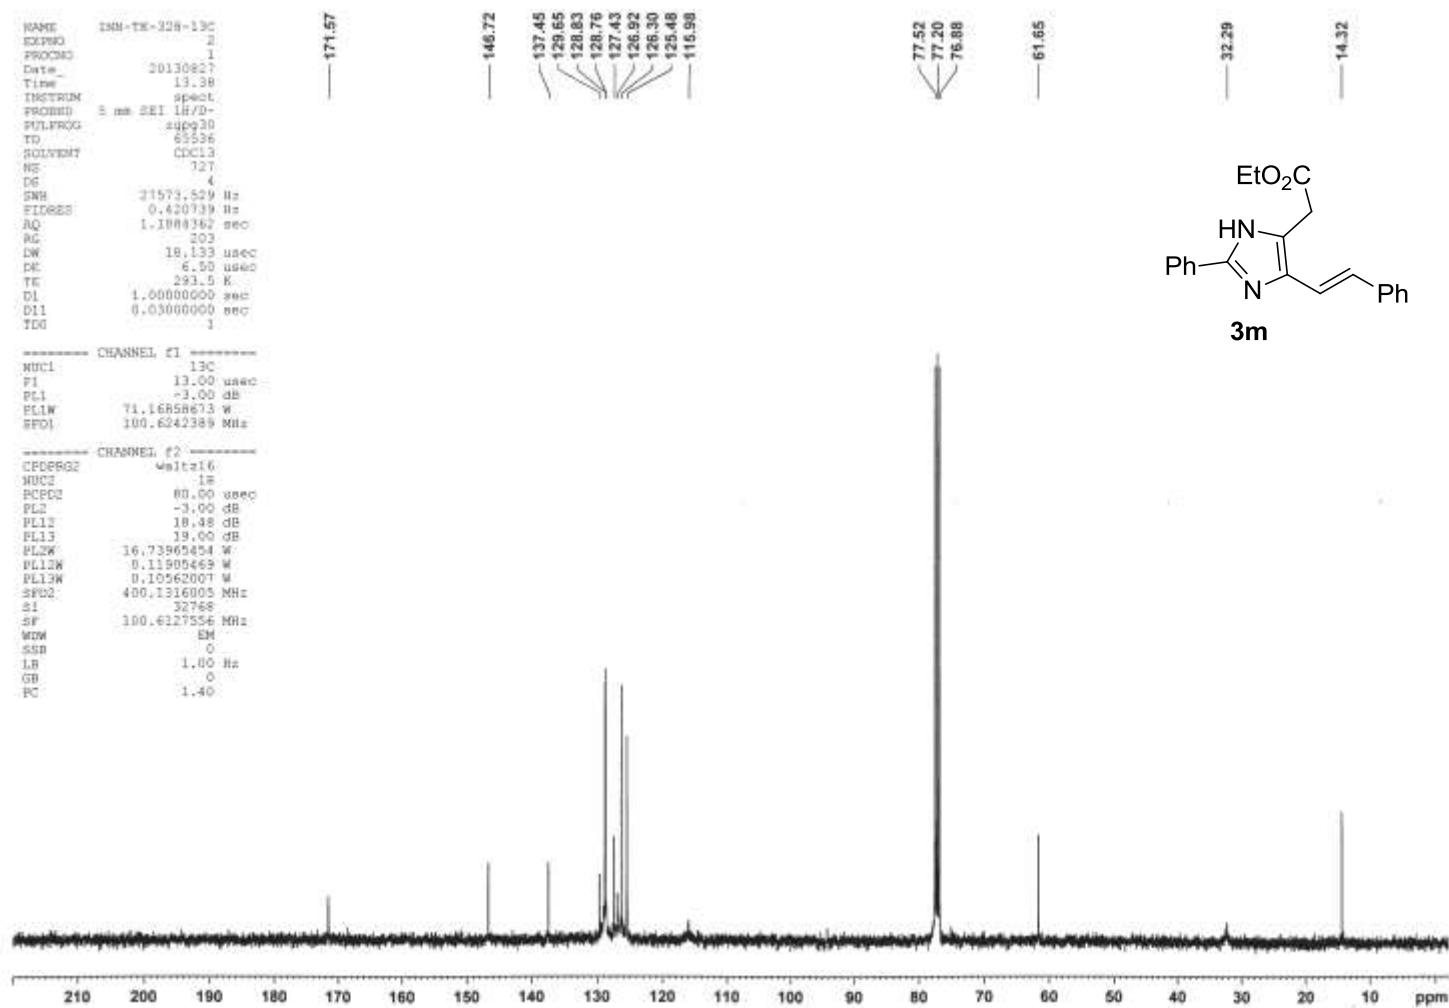

Figure S39. <sup>13</sup>C NMR spectrum of **3m**

# Indian Institute of Technology (B)

## Analysis Info

Analysis Name D:\Data\JUN-13\INN-TK-328.d  
 Method Tune\_pos\_Standard\_NAI-500.m  
 Sample Name INN-TK-328  
 Comment C21H20N2O2

Acquisition Date 6/10/2013 10:13:06 PM

Operator IIT-B  
 Instrument maXis impact 282001.00081

## Acquisition Parameter

|             |         |                       |           |                  |           |
|-------------|---------|-----------------------|-----------|------------------|-----------|
| Source Type | ESI     | Ion Polarity          | Positive  | Set Nebulizer    | 2.1 Bar   |
| Focus       | Active  | Set Capillary         | 3200 V    | Set Dry Heater   | 180 °C    |
| Scan Begin  | 50 m/z  | Set End Plate Offset  | -500 V    | Set Dry Gas      | 7.0 l/min |
| Scan End    | 500 m/z | Set Collision Cell RF | 300.0 Vpp | Set Divert Valve | Source    |

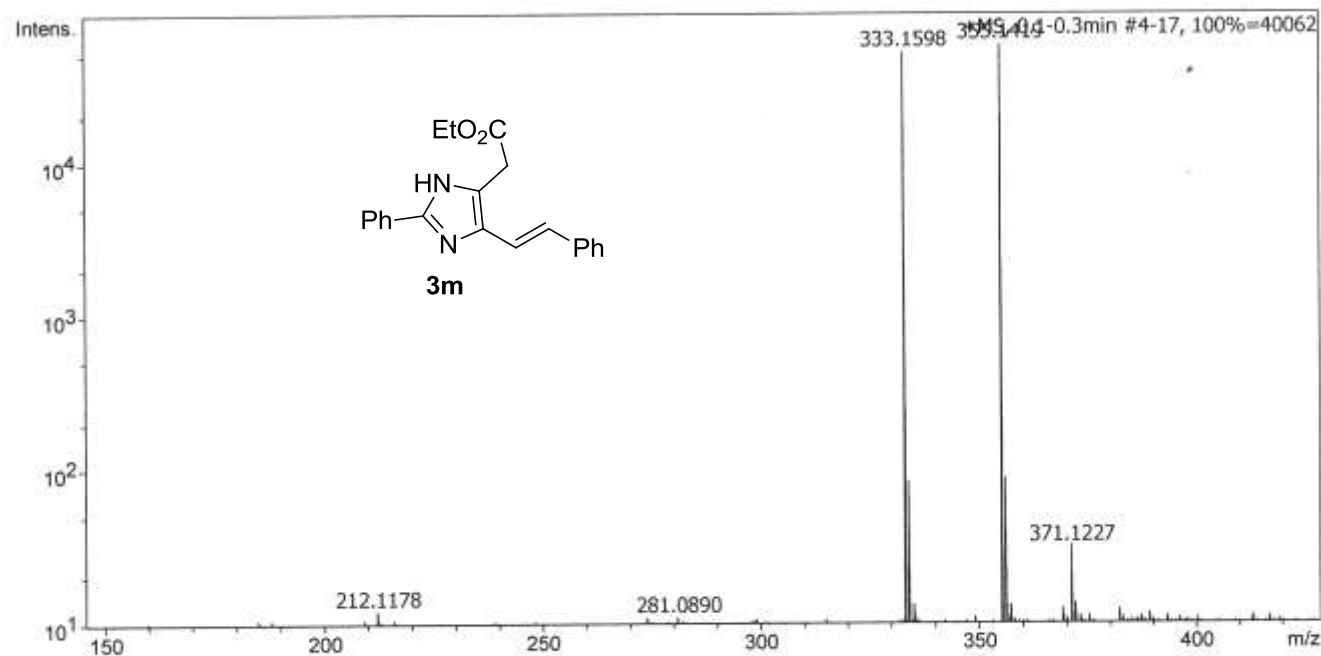

| Meas. m/z | # | Ion Formula | m/z      | err [ppm] | mSigma | # Sigma | Score  | rdb  | e <sup>-</sup> Conf | N-Rule |
|-----------|---|-------------|----------|-----------|--------|---------|--------|------|---------------------|--------|
| 333.1598  | 1 | C21H21N2O2  | 333.1598 | 0.2       | 6.6    | 1       | 100.00 | 12.5 | even                | ok     |

Figure S40. HRMS spectrum of **3m**

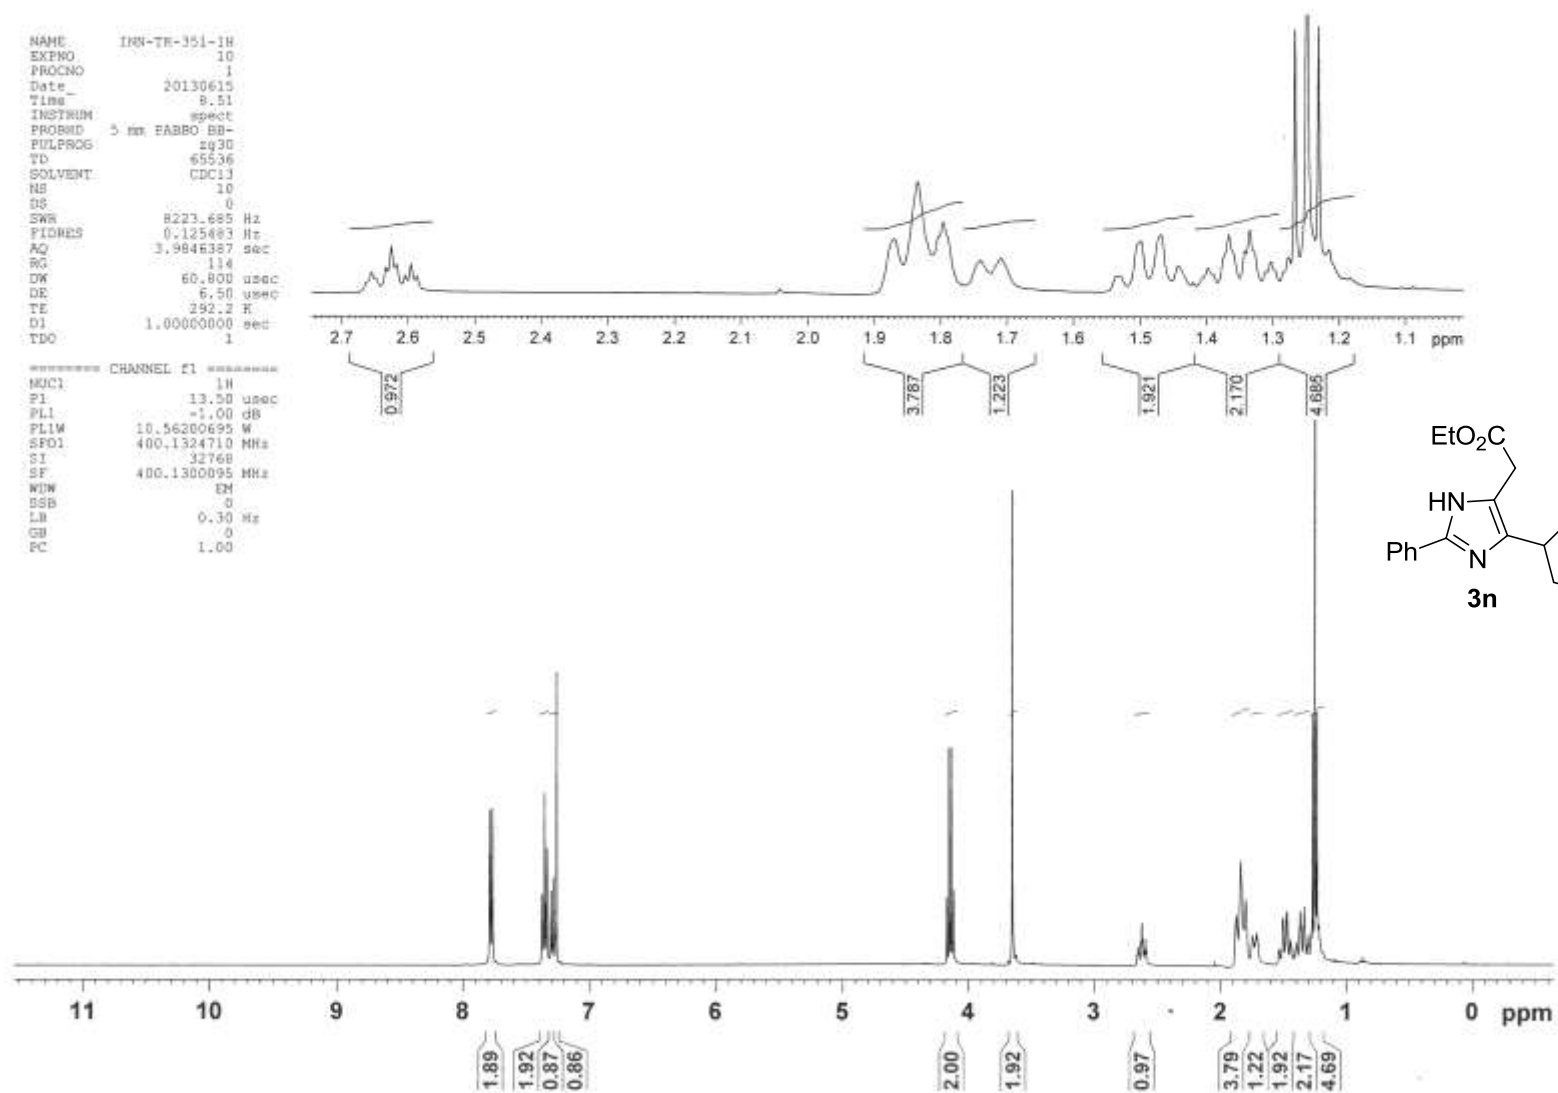

Figure S41.  $^1\text{H}$  NMR spectrum of **3n**

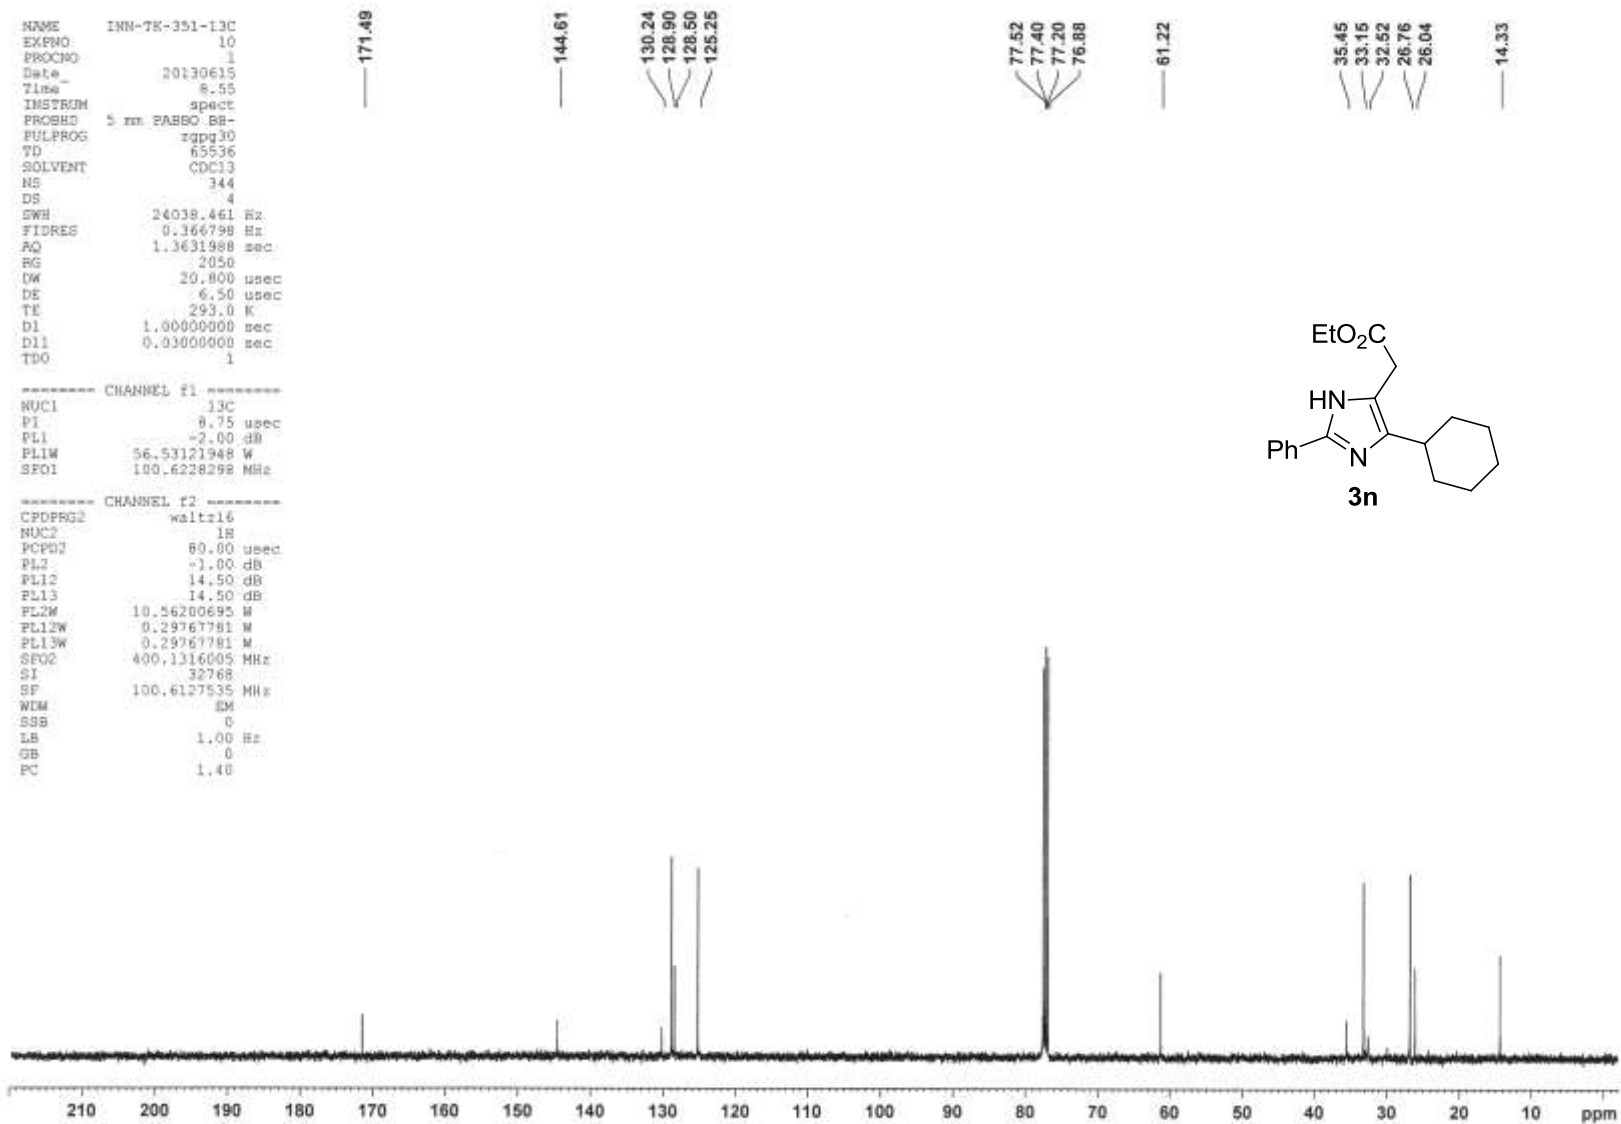

Figure S42. <sup>13</sup>C NMR spectrum of **3n**

# Indian Institute of Technology (B)

## Analysis Info

Analysis Name D:\Data\JUN-13\INN-TK-351.d  
 Method Tune\_pos\_Standard\_NAI-1000.m  
 Sample Name INN-TK-351  
 Comment C19H24N2O2

Acquisition Date 6/27/2013 8:53:35 PM

Operator IIT-B  
 Instrument maXis impact 282001.00081

## Acquisition Parameter

|             |          |                       |           |                  |           |
|-------------|----------|-----------------------|-----------|------------------|-----------|
| Source Type | ESI      | Ion Polarity          | Positive  | Set Nebulizer    | 2.1 Bar   |
| Focus       | Active   | Set Capillary         | 3500 V    | Set Dry Heater   | 180 °C    |
| Scan Begin  | 50 m/z   | Set End Plate Offset  | -500 V    | Set Dry Gas      | 7.0 l/min |
| Scan End    | 1000 m/z | Set Collision Cell RF | 600.0 Vpp | Set Divert Valve | Source    |

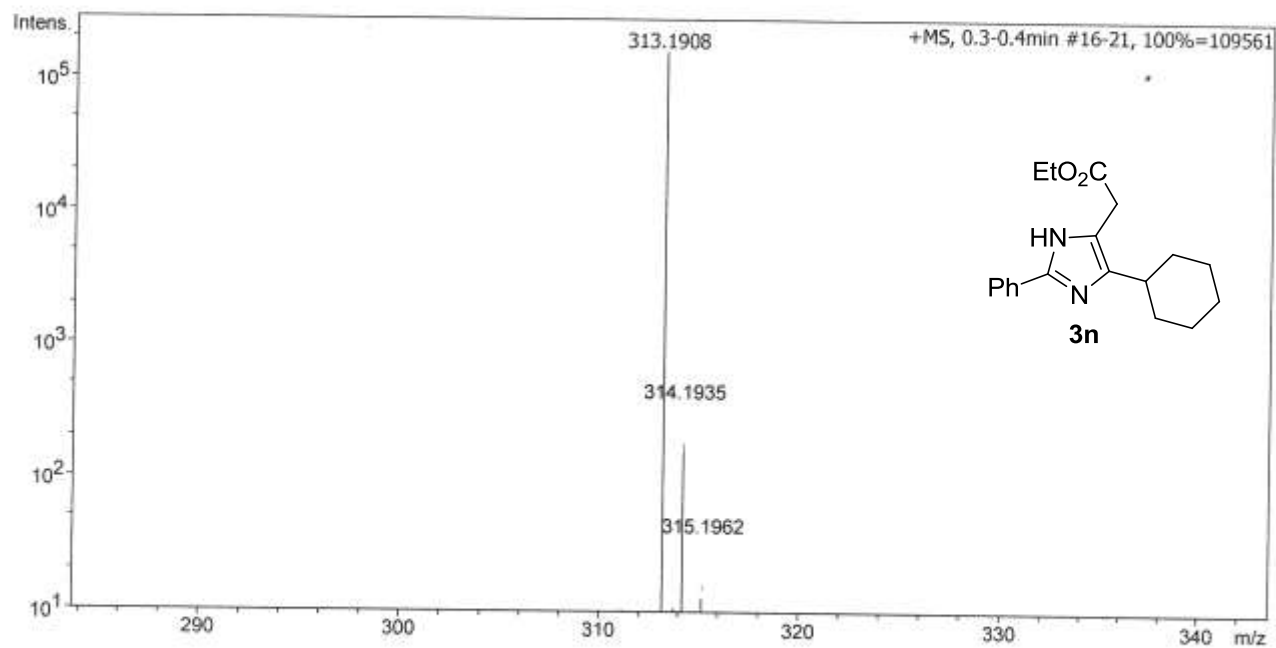

| Meas. m/z | # | Ion Formula | m/z      | err [ppm] | mSigma | # Sigma | Score  | rdb | e <sup>-</sup> Conf | N-Rule |
|-----------|---|-------------|----------|-----------|--------|---------|--------|-----|---------------------|--------|
| 313.1908  | 1 | C19H25N2O2  | 313.1911 | 0.8       | 40.0   | 1       | 100.00 | 8.5 | even                | ok     |

Figure S43. HRMS spectrum of **3n**

NAME INN-TK-343-1H  
 EXPNO 6  
 PROCNO 1  
 Date\_ 20130406  
 Time\_ 21.46  
 INSTRUM spect  
 PROBHD 5 mm F4BBO BB-  
 PULPROG zg30  
 TD 65536  
 SOLVENT CDCl3  
 NS 9  
 DS 0  
 SWH 8221.685 Hz  
 FIDRES 0.125483 Hz  
 AQ 3.9846387 sec  
 RG 32  
 DW 60.800 usec  
 DE 6.50 usec  
 TE 295.5 K  
 D1 1.00000000 sec  
 TDO 1

----- CHANNEL f1 -----  
 NUC1 1H  
 P1 13.50 usec  
 PL1 -1.00 dB  
 PL1W 10.56200695 W  
 SFO1 400.1324710 MHz  
 SI 32768  
 SF 400.1300096 MHz  
 WDW EM  
 SSB 0  
 LB 0.30 Hz  
 GB 0  
 PC 1.00

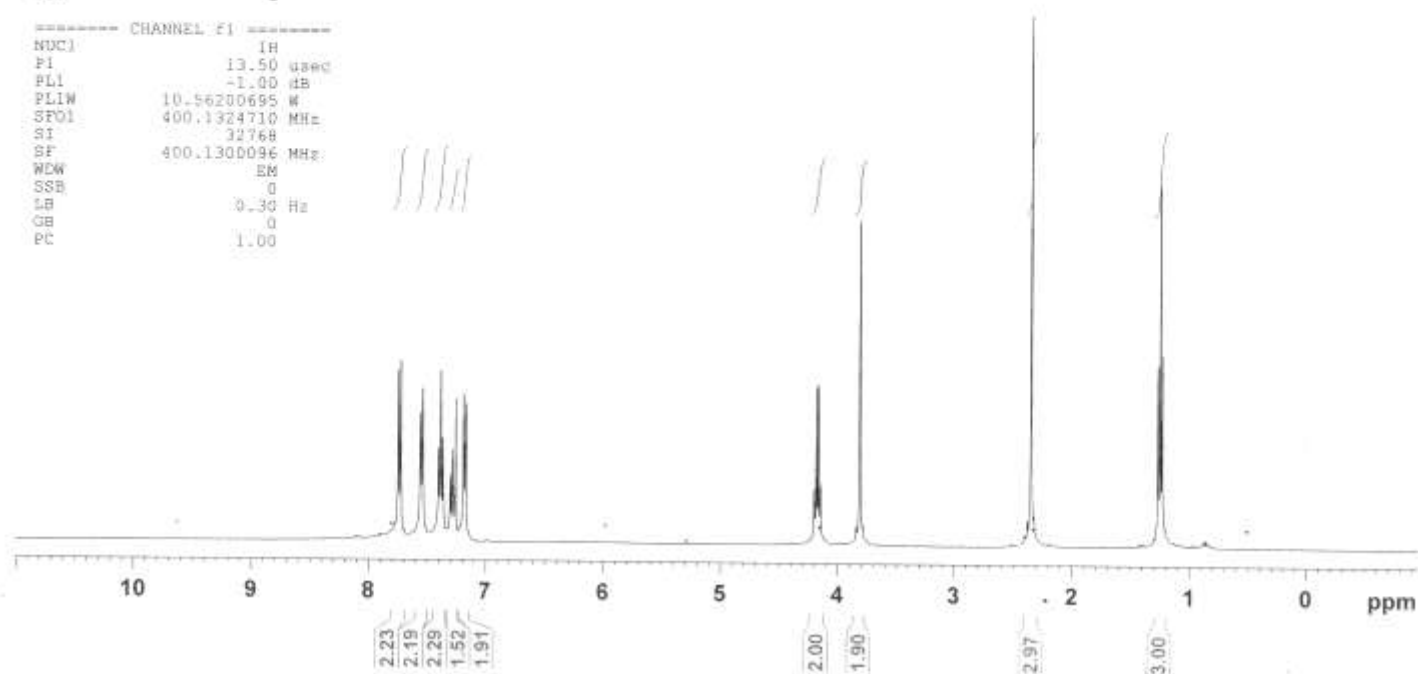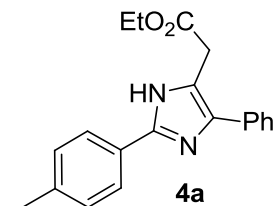

Figure S44. <sup>1</sup>H NMR spectrum of **4a**

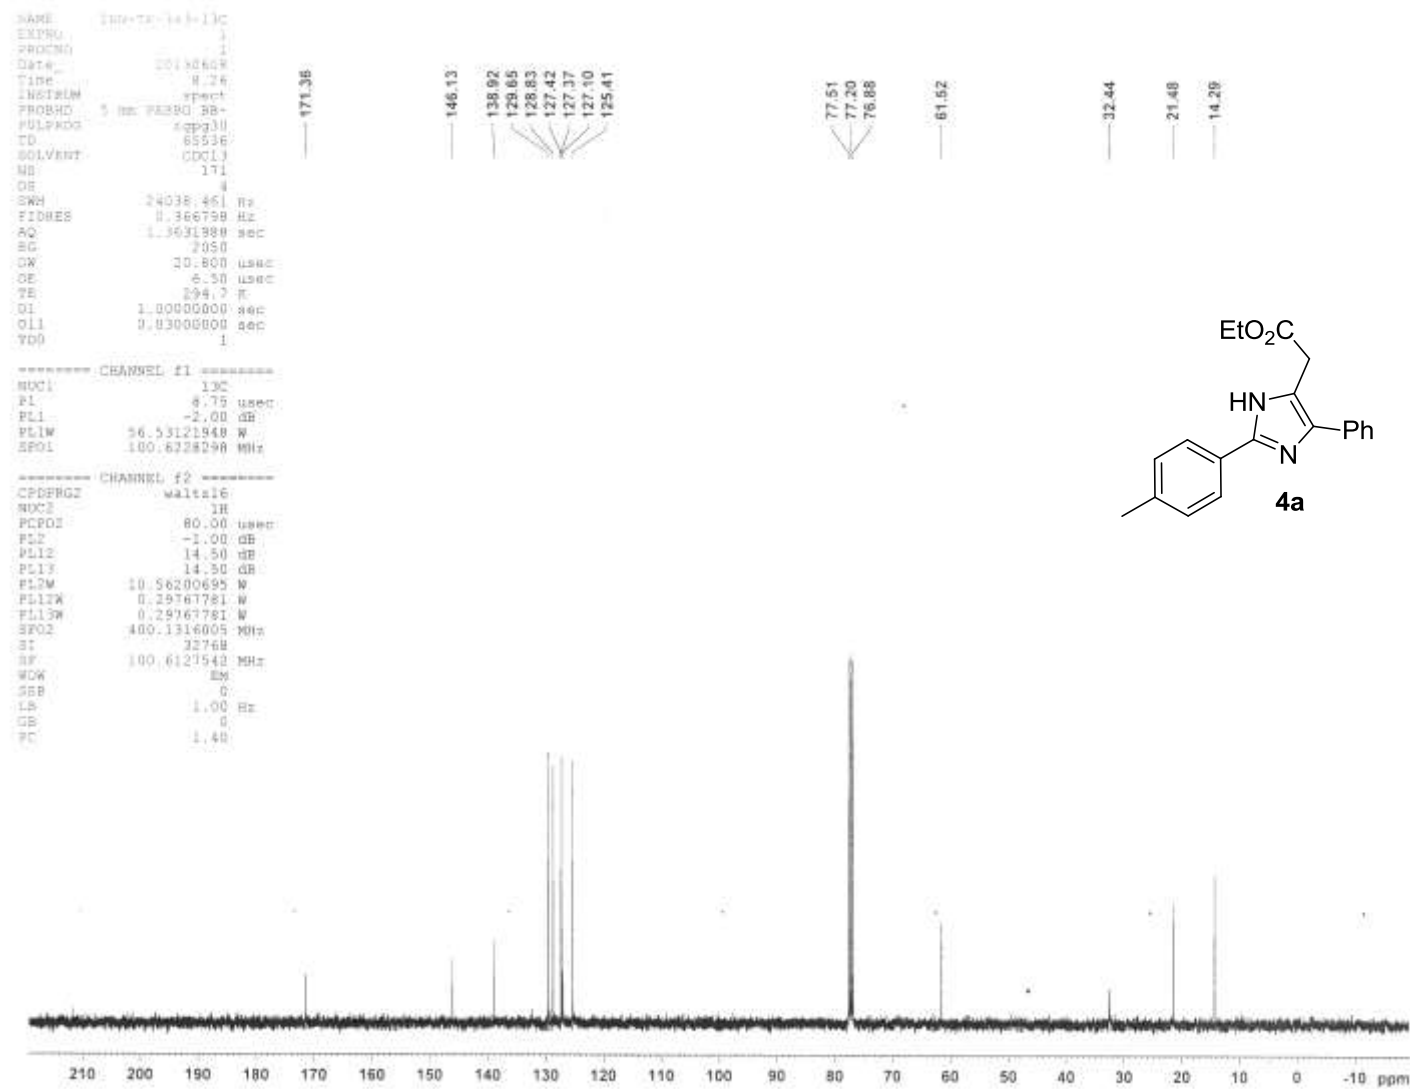

Figure S45. <sup>13</sup>C NMR spectrum of **4a**

# Indian Institute of Technology (B)

## Analysis Info

Analysis Name D:\Data\JUN-13\INN-TK-343.d  
 Method Tune\_pos\_Standard\_NAI-500.m  
 Sample Name INN-TK-343  
 Comment C20H20N2O2

Acquisition Date 6/10/2013 9:31:45 PM

Operator IIT-B  
 Instrument maXis impact 282001.00081

## Acquisition Parameter

|             |         |                       |           |                  |           |
|-------------|---------|-----------------------|-----------|------------------|-----------|
| Source Type | ESI     | Ion Polarity          | Positive  | Set Nebulizer    | 2.1 Bar   |
| Focus       | Active  | Set Capillary         | 3200 V    | Set Dry Heater   | 180 °C    |
| Scan Begin  | 50 m/z  | Set End Plate Offset  | -500 V    | Set Dry Gas      | 7.0 l/min |
| Scan End    | 500 m/z | Set Collision Cell RF | 300.0 Vpp | Set Divert Valve | Source    |

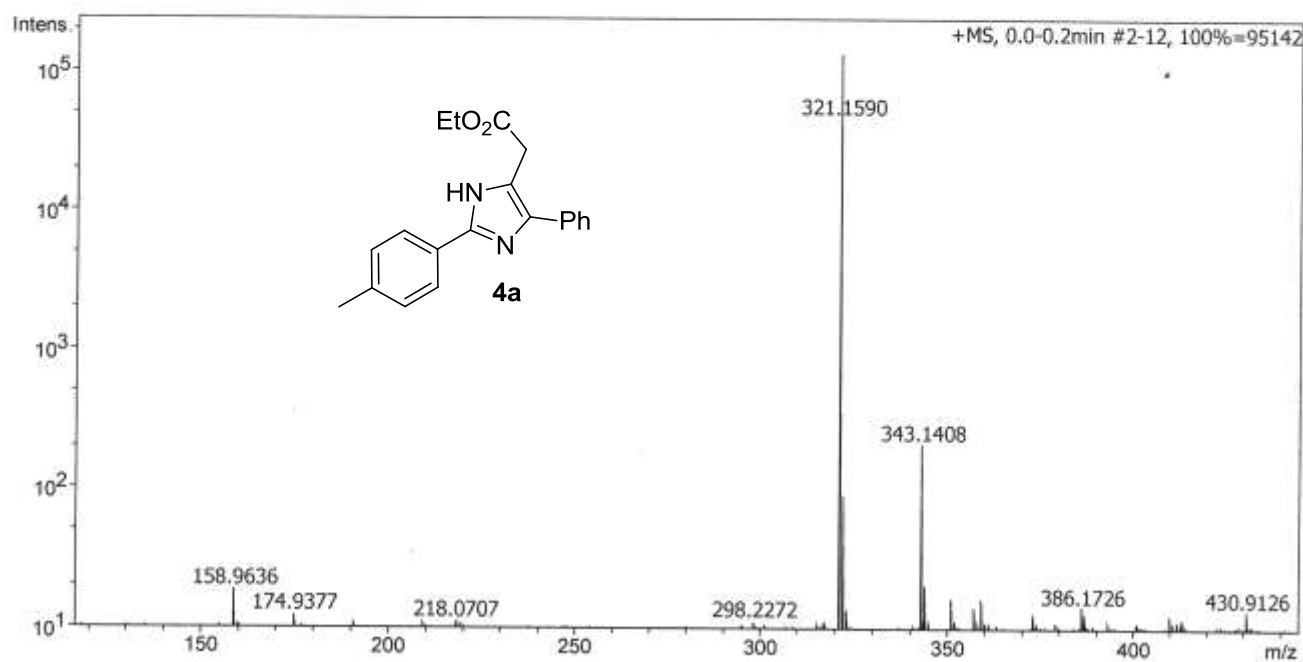

| Meas. m/z | # | Ion Formula | m/z      | err [ppm] | mSigma | # Sigma | Score  | rdb  | e <sup>-</sup> Conf | N-Rule |
|-----------|---|-------------|----------|-----------|--------|---------|--------|------|---------------------|--------|
| 321.1590  | 1 | C20H21N2O2  | 321.1598 | -2.4      | 18.7   | 1       | 100.00 | 11.5 | even                | ok     |

Figure S46. HRMS spectrum of **4a**

NAME INN-TK-346-1H  
 EXPNO 7  
 PROCNO 1  
 Date\_ 20130606  
 Time 21.51  
 INSTRUM spect  
 PROBHD 5 mm PASBO BB-  
 PULPROG zg30  
 TD 65536  
 SOLVENT CDCl3  
 NS 18  
 DS 0  
 SWH 8223.685 Hz  
 FIDRES 0.125483 Hz  
 AQ 3.9846387 sec  
 RG 32  
 DW 60.800 usec  
 DE 6.50 usec  
 TE 295.5 K  
 D1 1.00000000 sec  
 TDO 1

INN-TK-346-1H

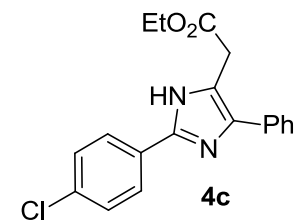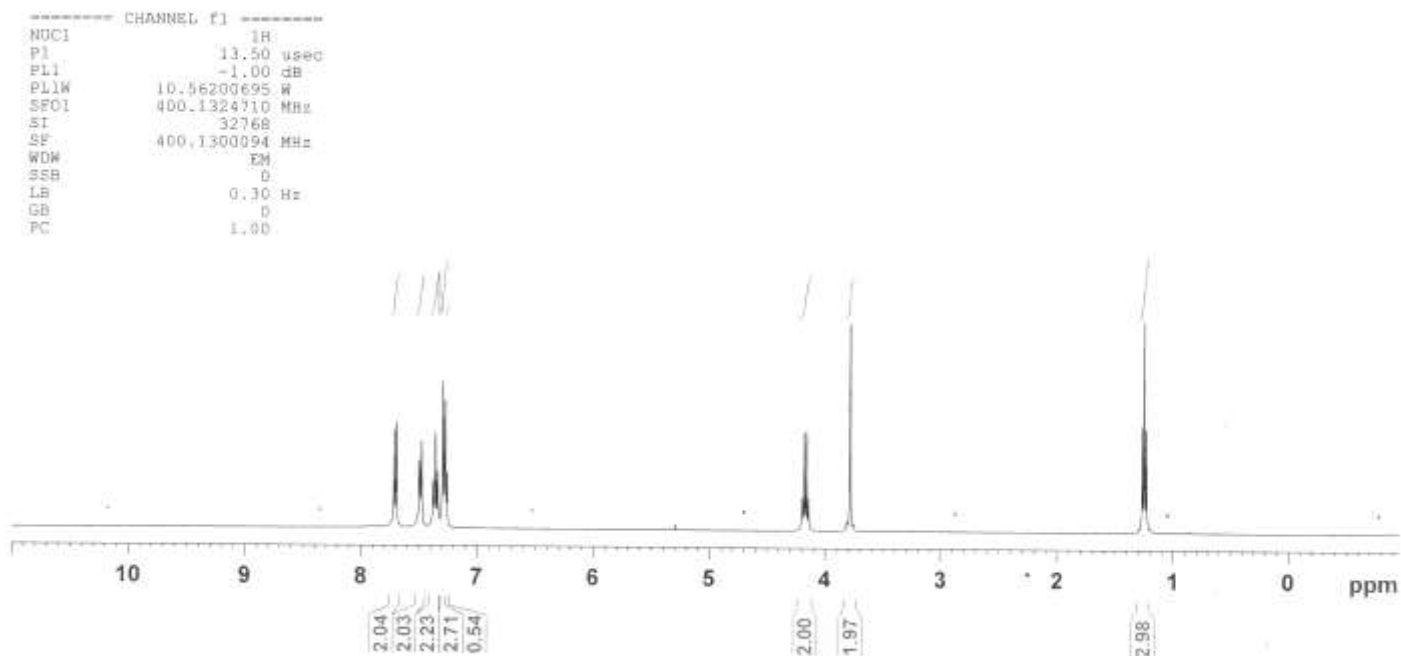

Figure S47.  $^1\text{H}$  NMR spectrum of **4c**

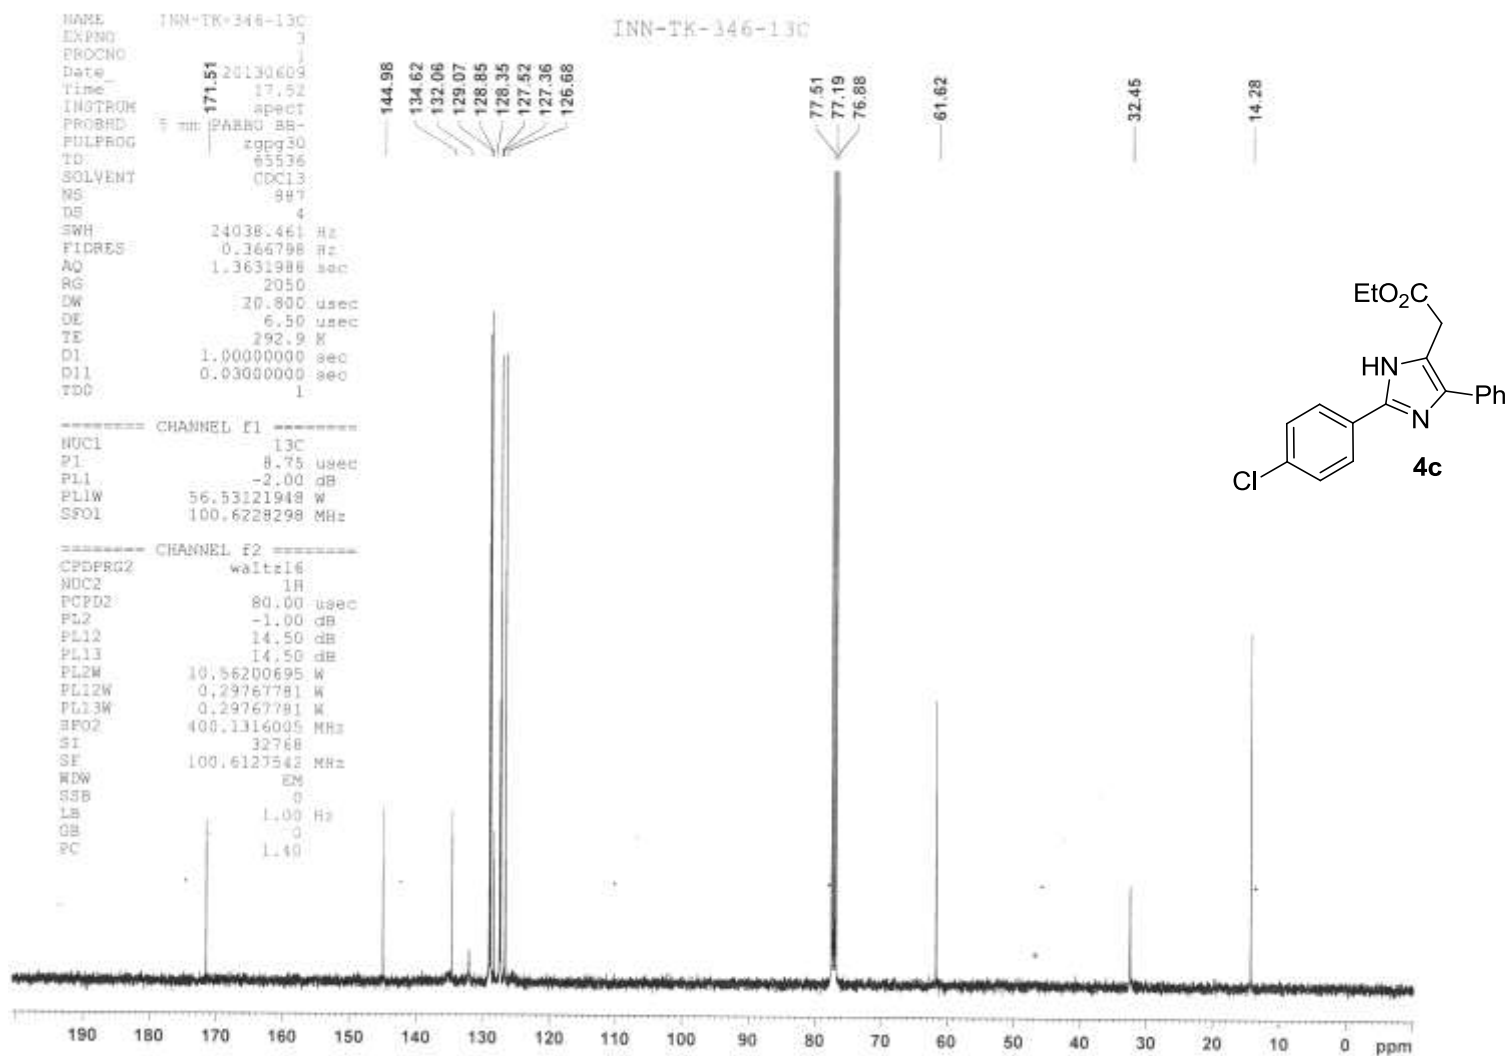

Figure S48.  $^{13}\text{C}$  NMR spectrum of **4c**

# Indian Institute of Technology (B)

## Analysis Info

Analysis Name D:\Data\JUN-13\INN-TK-346.d  
 Method Tune\_pos\_Standard\_NAI-1000.m  
 Sample Name INN-TK-346  
 Comment C19H17ClN2O2

Acquisition Date 6/10/2013 5:43:10 PM

Operator IIT-B  
 Instrument maXis impact 282001.00081

## Acquisition Parameter

|             |          |                       |           |                  |           |
|-------------|----------|-----------------------|-----------|------------------|-----------|
| Source Type | ESI      | Ion Polarity          | Positive  | Set Nebulizer    | 2.1 Bar   |
| Focus       | Active   | Set Capillary         | 3500 V    | Set Dry Heater   | 180 °C    |
| Scan Begin  | 50 m/z   | Set End Plate Offset  | -500 V    | Set Dry Gas      | 7.0 l/min |
| Scan End    | 1000 m/z | Set Collision Cell RF | 400.0 Vpp | Set Divert Valve | Source    |

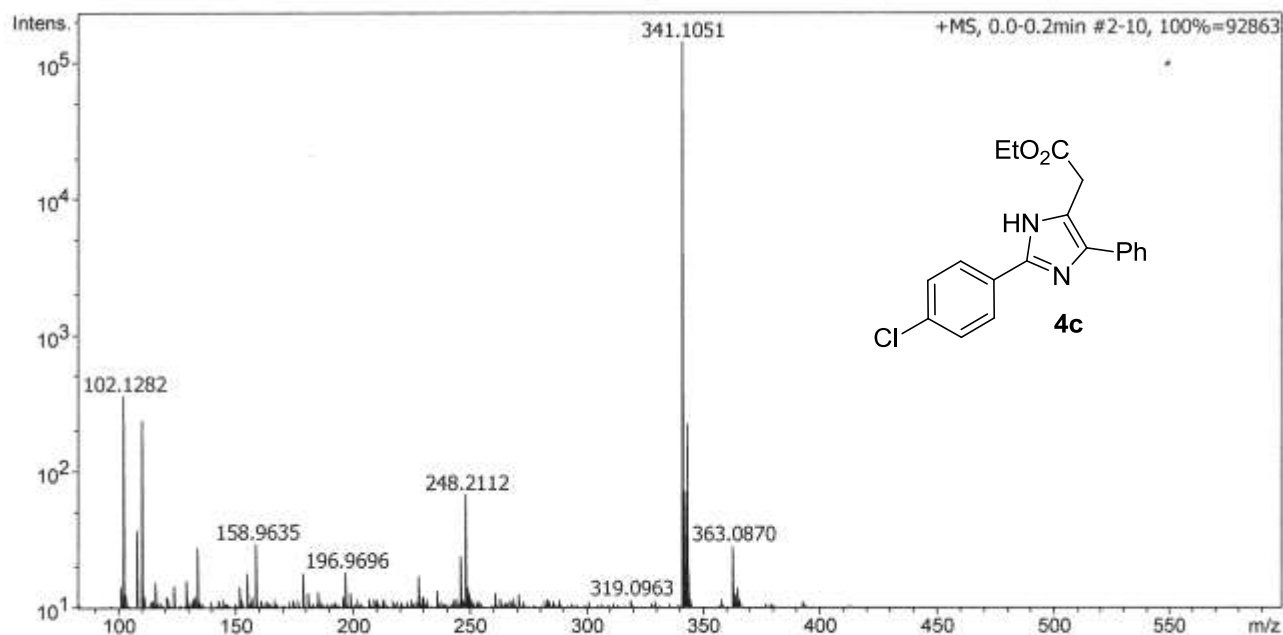

| Meas. m/z | # | Ion Formula  | m/z      | err [ppm] | mSigma | # Sigma | Score  | rdB  | e <sup>-</sup> Conf | N-Rule |
|-----------|---|--------------|----------|-----------|--------|---------|--------|------|---------------------|--------|
| 341.1051  | 1 | C19H18ClN2O2 | 341.1051 | 0.0       | 10.0   | 1       | 100.00 | 11.5 | even                | ok     |

Figure S49. HRMS spectrum of **4c**

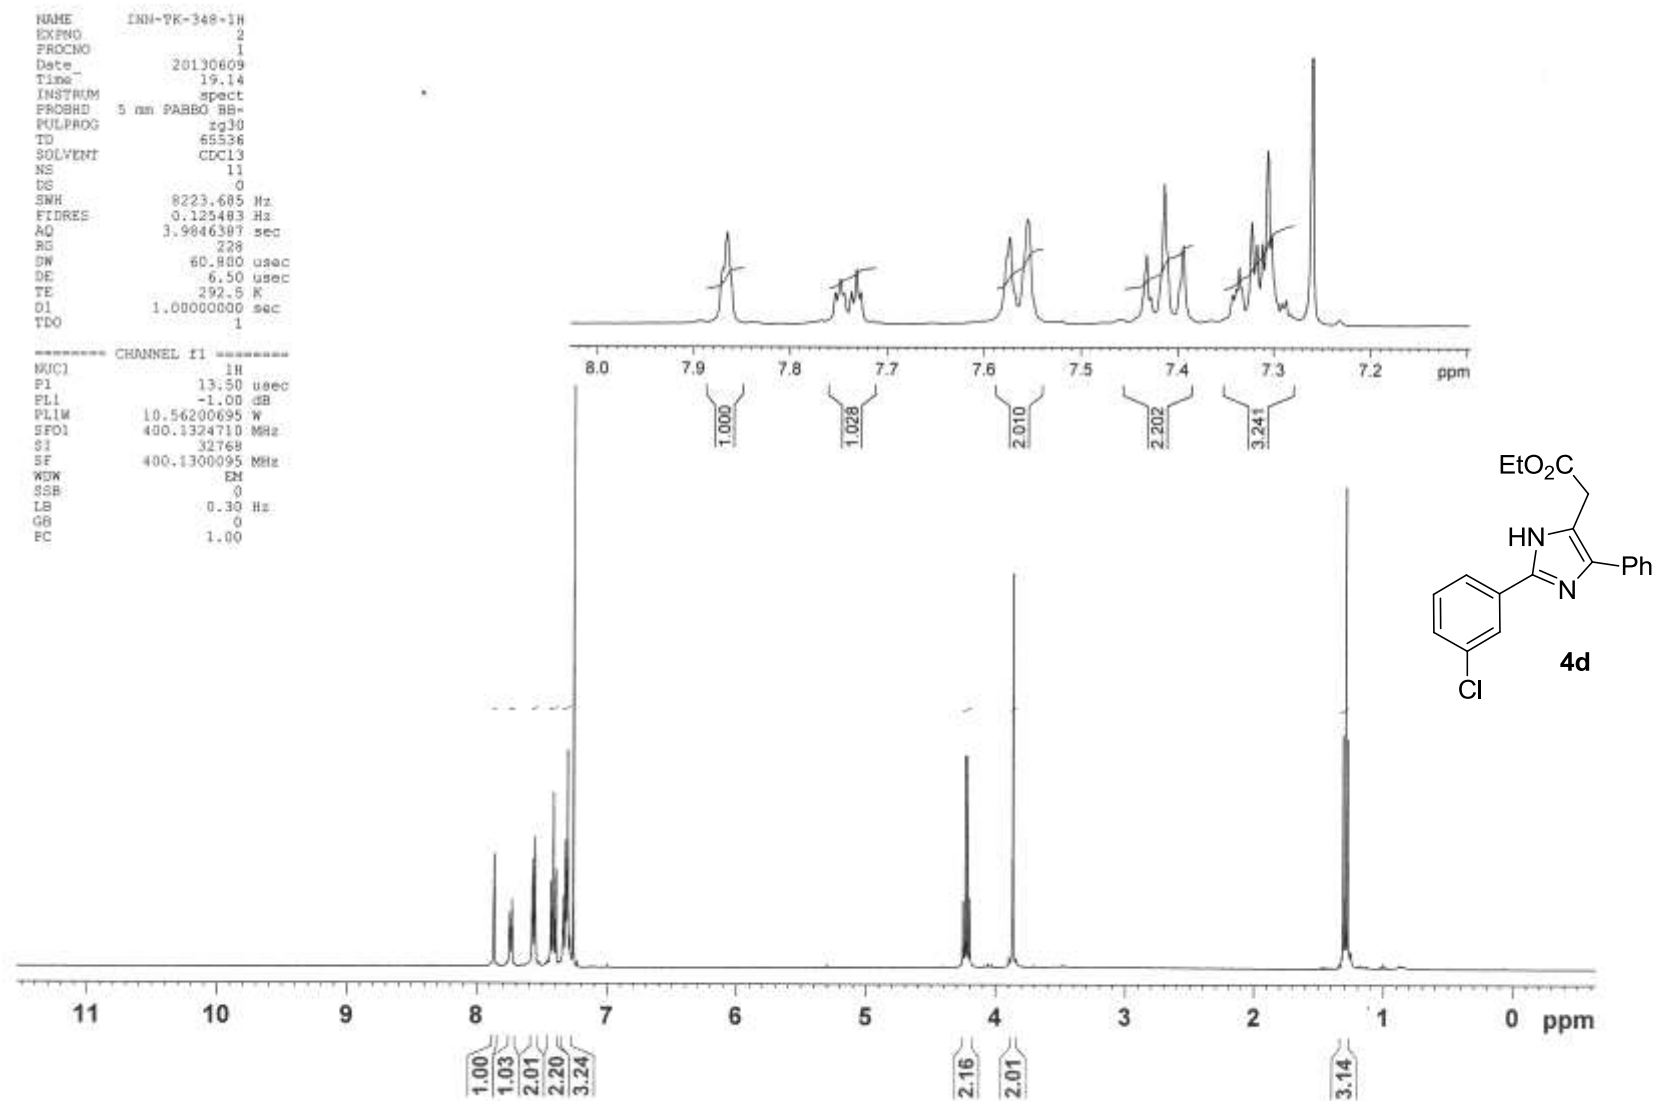

Figure S50.  $^1\text{H}$  NMR spectrum of **4d**

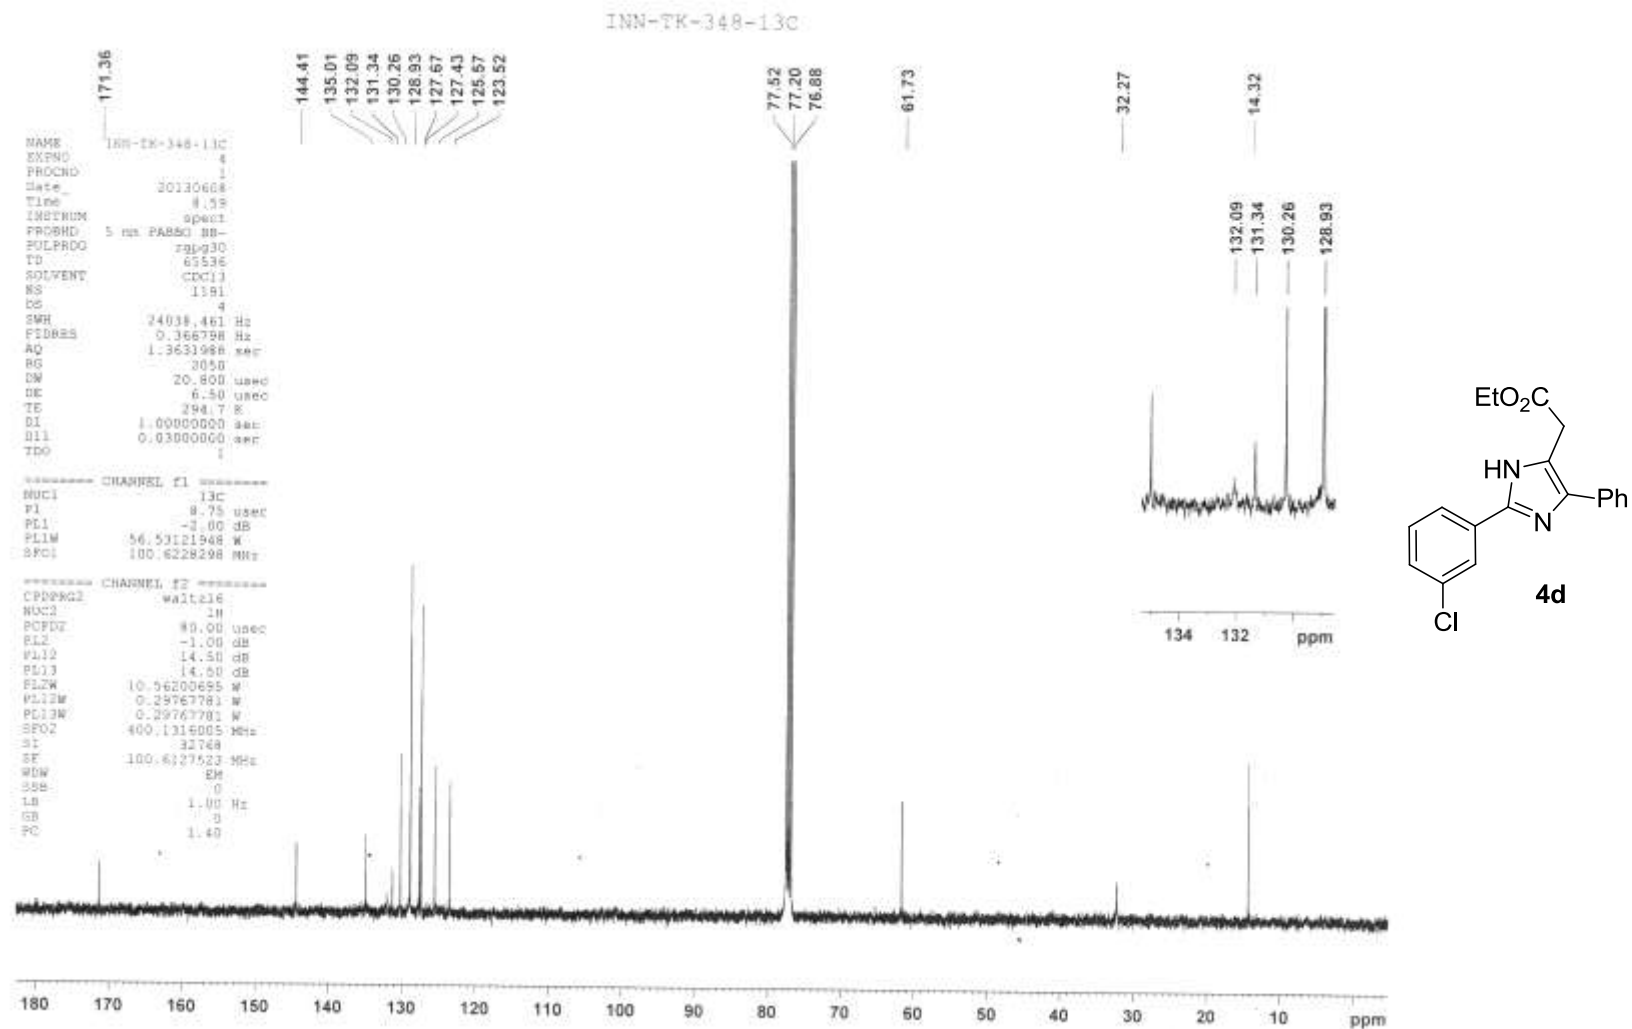

Figure S51. <sup>13</sup>C NMR spectrum of **4d**

# Indian Institute of Technology (B)

## Analysis Info

Analysis Name D:\Data\JUN-13\INN-TK-348.d  
 Method Tune\_pos\_Standard\_NAI-500.m  
 Sample Name INN-TK-348  
 Comment C19H17CIN2O2

Acquisition Date 6/10/2013 9:13:54 PM

Operator IIT-B  
 Instrument maXis impact 282001.00081

## Acquisition Parameter

|             |         |                       |           |                  |           |
|-------------|---------|-----------------------|-----------|------------------|-----------|
| Source Type | ESI     | Ion Polarity          | Positive  | Set Nebulizer    | 2.1 Bar   |
| Focus       | Active  | Set Capillary         | 3200 V    | Set Dry Heater   | 180 °C    |
| Scan Begin  | 50 m/z  | Set End Plate Offset  | -500 V    | Set Dry Gas      | 7.0 l/min |
| Scan End    | 500 m/z | Set Collision Cell RF | 300.0 Vpp | Set Divert Valve | Source    |

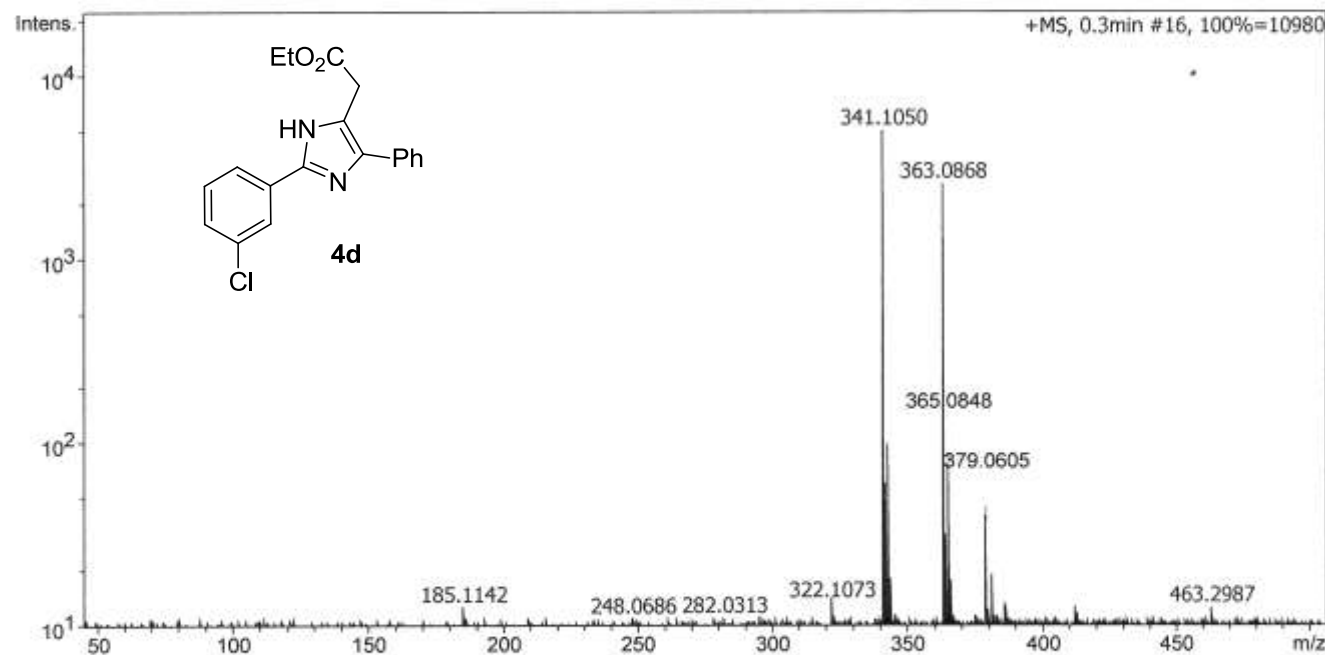

| Meas. m/z | # | Ion Formula  | m/z      | err [ppm] | mSigma | # Sigma | Score  | rdb  | e <sup>-</sup> Conf | N-Rule |
|-----------|---|--------------|----------|-----------|--------|---------|--------|------|---------------------|--------|
| 341.1050  | 1 | C19H18CIN2O2 | 341.1051 | -0.5      | 36.1   | 1       | 100.00 | 11.5 | even                | ok     |

Figure S52. HRMS spectrum of **4d**

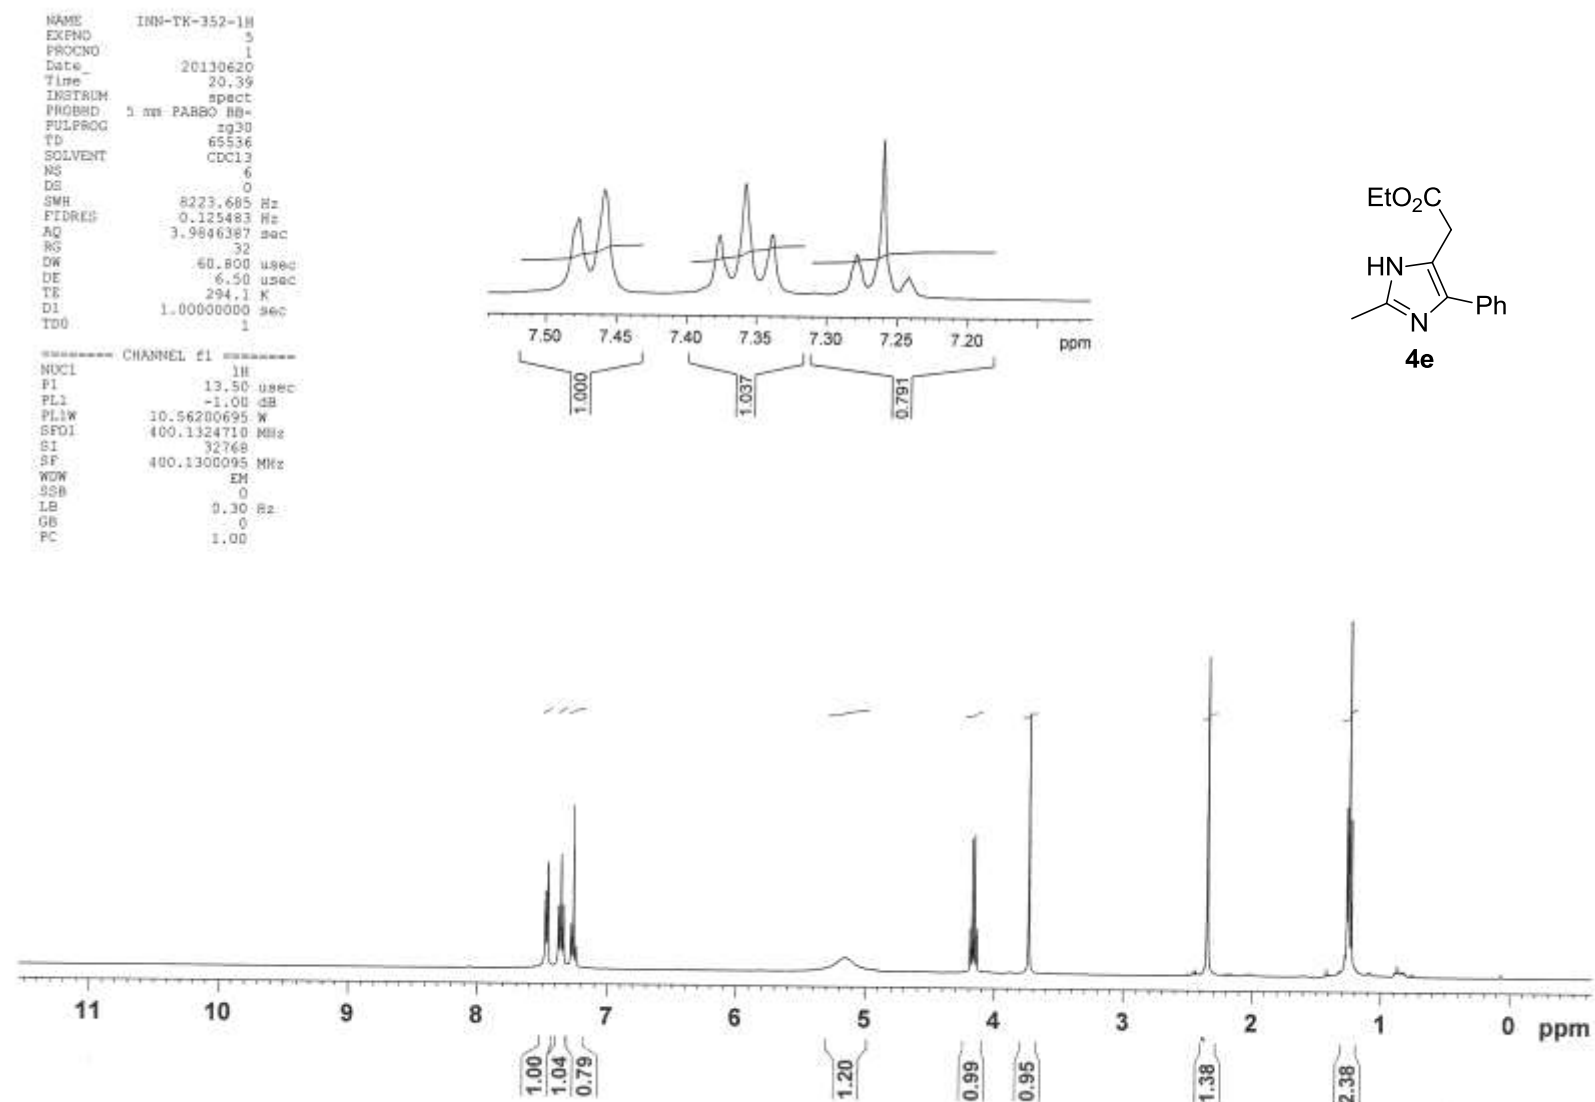

S53.  $^1\text{H}$  NMR spectrum of **4e**

Figure

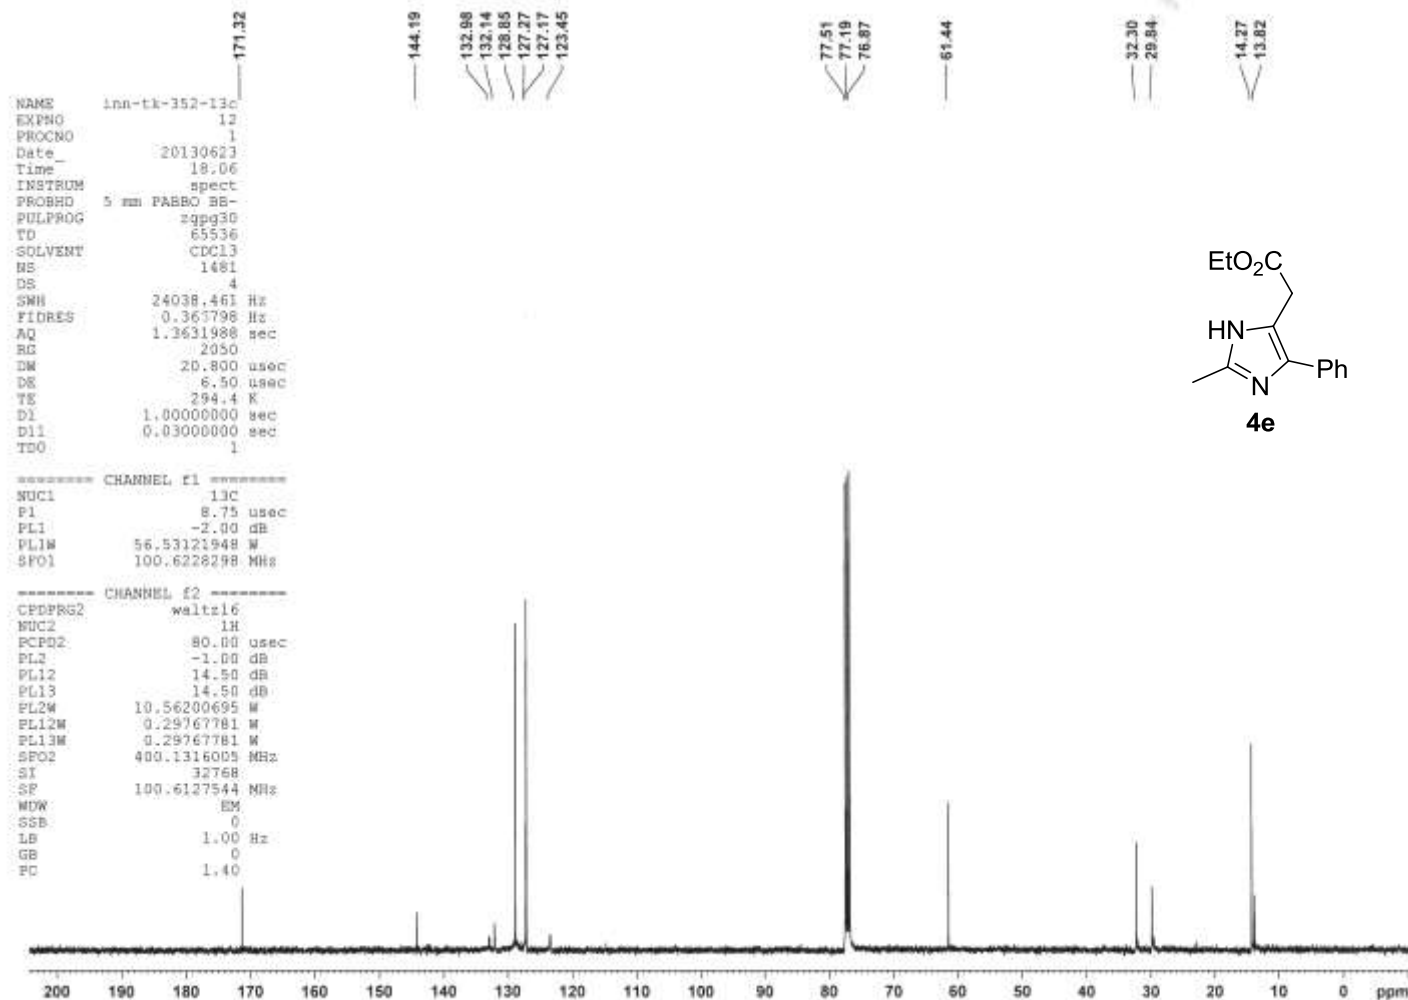

Figure S54. <sup>13</sup>C NMR spectrum of **4e**

## Indian Institute of Technology (B)

### Analysis Info

Analysis Name D:\Data\JUN-13\INN-TK-352.d  
 Method Tune\_pos\_Standard\_NAI-1000.m  
 Sample Name INN-TK-352  
 Comment C14H16N2O2

Acquisition Date 6/27/2013 9:01:05 PM

Operator IIT-B  
 Instrument maXis impact 282001.00081

### Acquisition Parameter

|             |          |                       |           |                  |           |
|-------------|----------|-----------------------|-----------|------------------|-----------|
| Source Type | ESI      | Ion Polarity          | Positive  | Set Nebulizer    | 2.1 Bar   |
| Focus       | Active   | Set Capillary         | 3500 V    | Set Dry Heater   | 180 °C    |
| Scan Begin  | 50 m/z   | Set End Plate Offset  | -500 V    | Set Dry Gas      | 7.0 l/min |
| Scan End    | 1000 m/z | Set Collision Cell RF | 600.0 Vpp | Set Divert Valve | Source    |

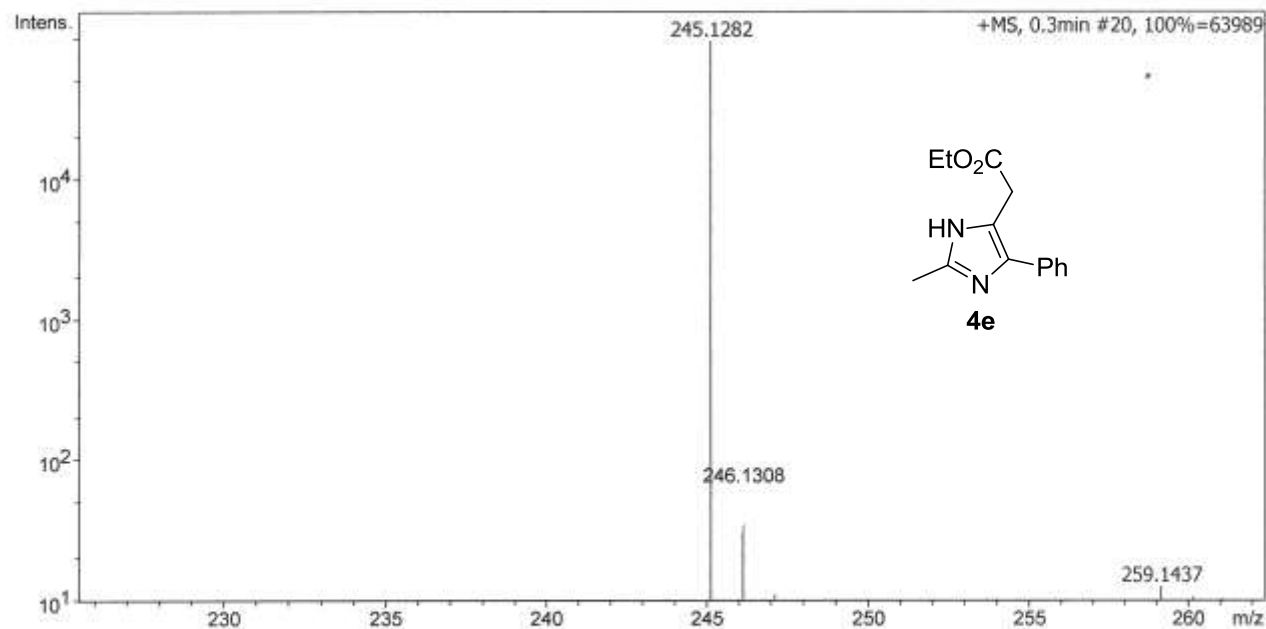

| Meas. m/z | # | Ion Formula | m/z      | err [ppm] | mSigma | # Sigma | Score  | rdB | e <sup>-</sup> Conf | N-Rule |
|-----------|---|-------------|----------|-----------|--------|---------|--------|-----|---------------------|--------|
| 245.1282  | 1 | C14H17N2O2  | 245.1285 | 0.9       | 23.8   | 1       | 100.00 | 7.5 | even                | ok     |

Figure S55. HRMS spectrum of **4e**

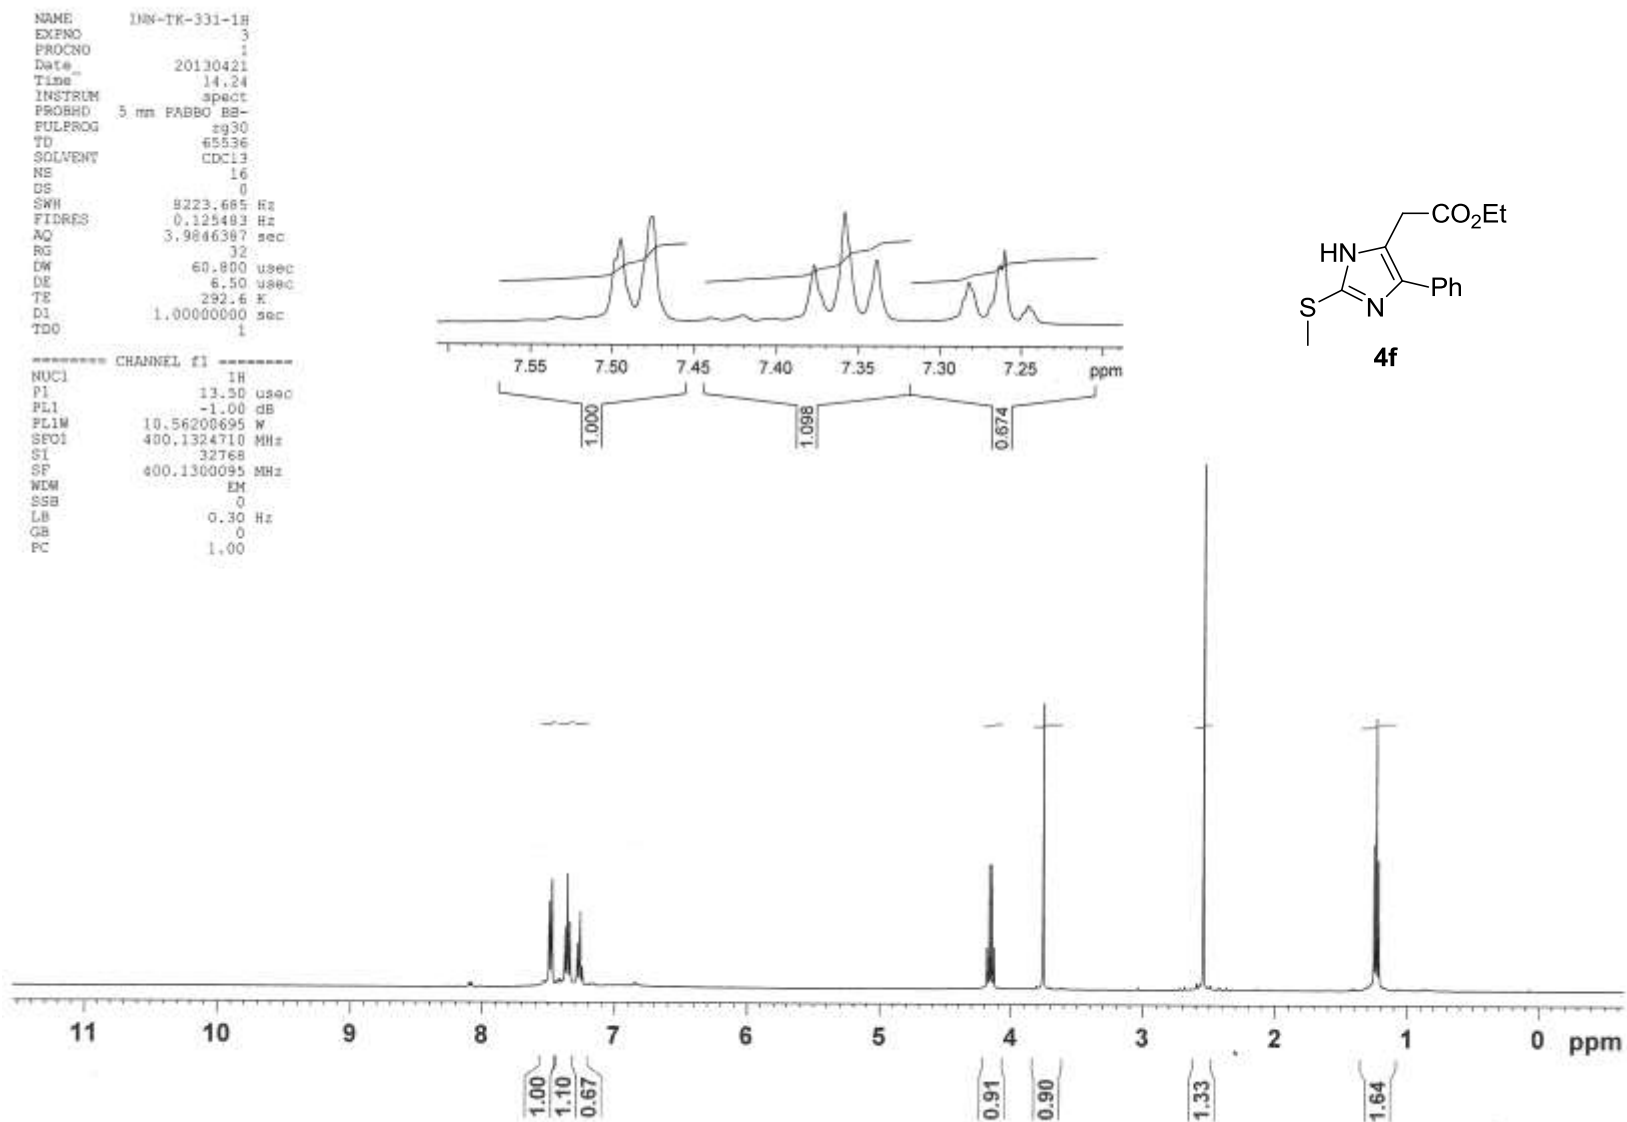

Figure S56.  $^1\text{H}$  NMR spectrum of **4f**

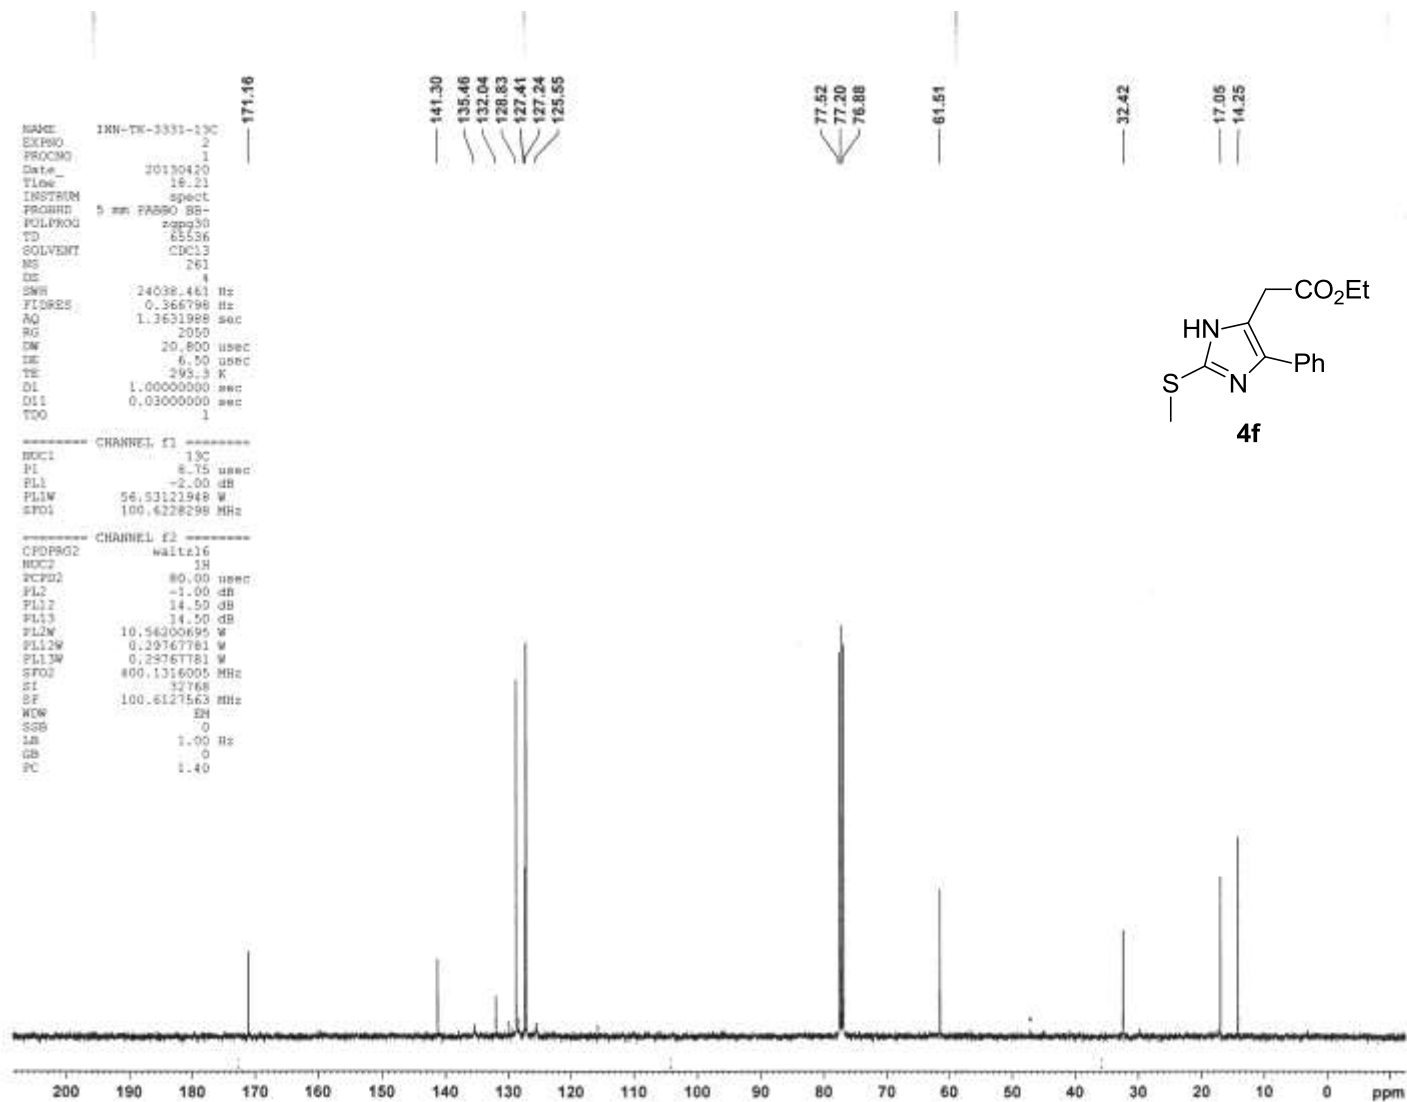

Figure S57. <sup>13</sup>C NMR spectrum of **4f**

# Indian Institute of Technology (B)

## Analysis Info

Analysis Name D:\Data\JUN-13\INN-TK-331 .d  
Method Tune\_pos\_Standard\_NAI-500.m  
Sample Name INN-TK-331  
Comment C14H16N2O2S

Acquisition Date 6/10/2013 9:54:24 PM

Operator IIT-B  
Instrument maXis impact 282001.00081

## Acquisition Parameter

|             |         |                       |           |                  |           |
|-------------|---------|-----------------------|-----------|------------------|-----------|
| Source Type | ESI     | Ion Polarity          | Positive  | Set Nebulizer    | 2.1 Bar   |
| Focus       | Active  | Set Capillary         | 3200 V    | Set Dry Heater   | 180 °C    |
| Scan Begin  | 50 m/z  | Set End Plate Offset  | -500 V    | Set Dry Gas      | 7.0 l/min |
| Scan End    | 500 m/z | Set Collision Cell RF | 300.0 Vpp | Set Divert Valve | Source    |

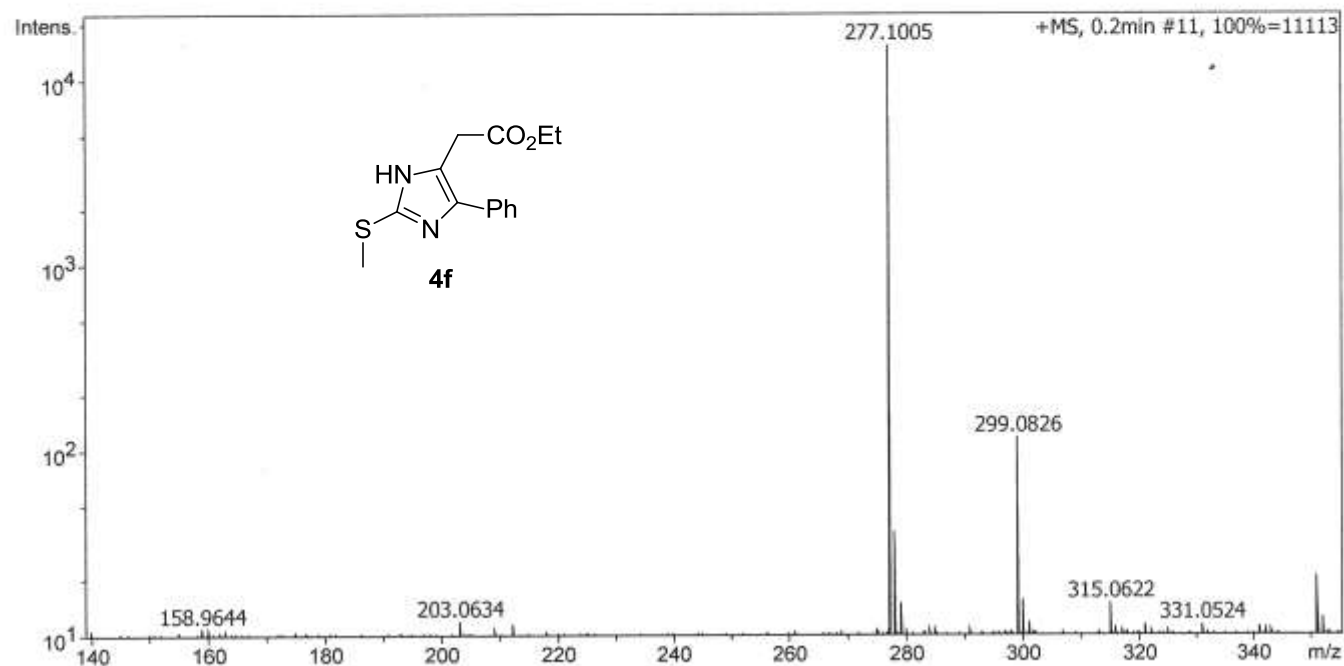

| Meas. m/z | # | Ion Formula | m/z      | err [ppm] | mSigma | # Sigma | Score  | rdb | e <sup>-</sup> Conf | N-Rule |
|-----------|---|-------------|----------|-----------|--------|---------|--------|-----|---------------------|--------|
| 277.1005  | 1 | C14H17N2O2S | 277.1005 | -0.1      | 7.5    | 1       | 100.00 | 7.5 | even                | ok     |

Figure S58. HRMS spectrum of **4f**

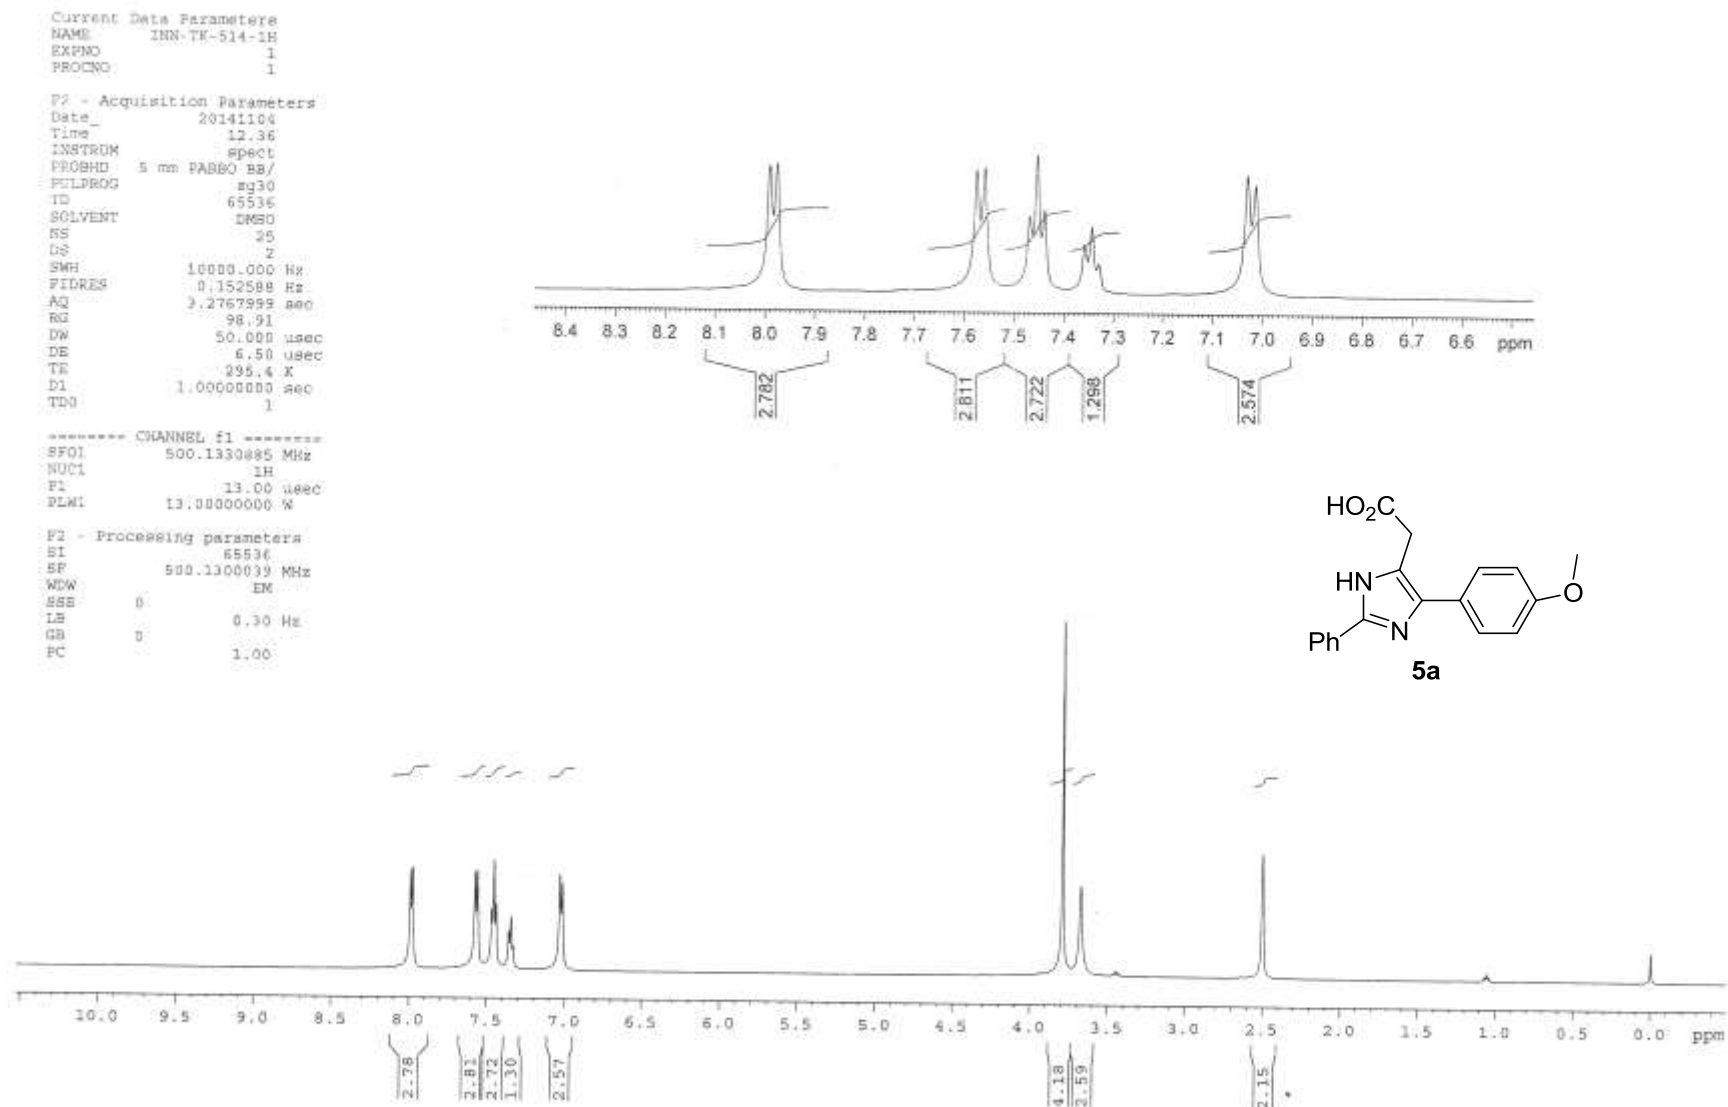

Figure S59.  $^1\text{H}$  NMR spectrum of **5a**

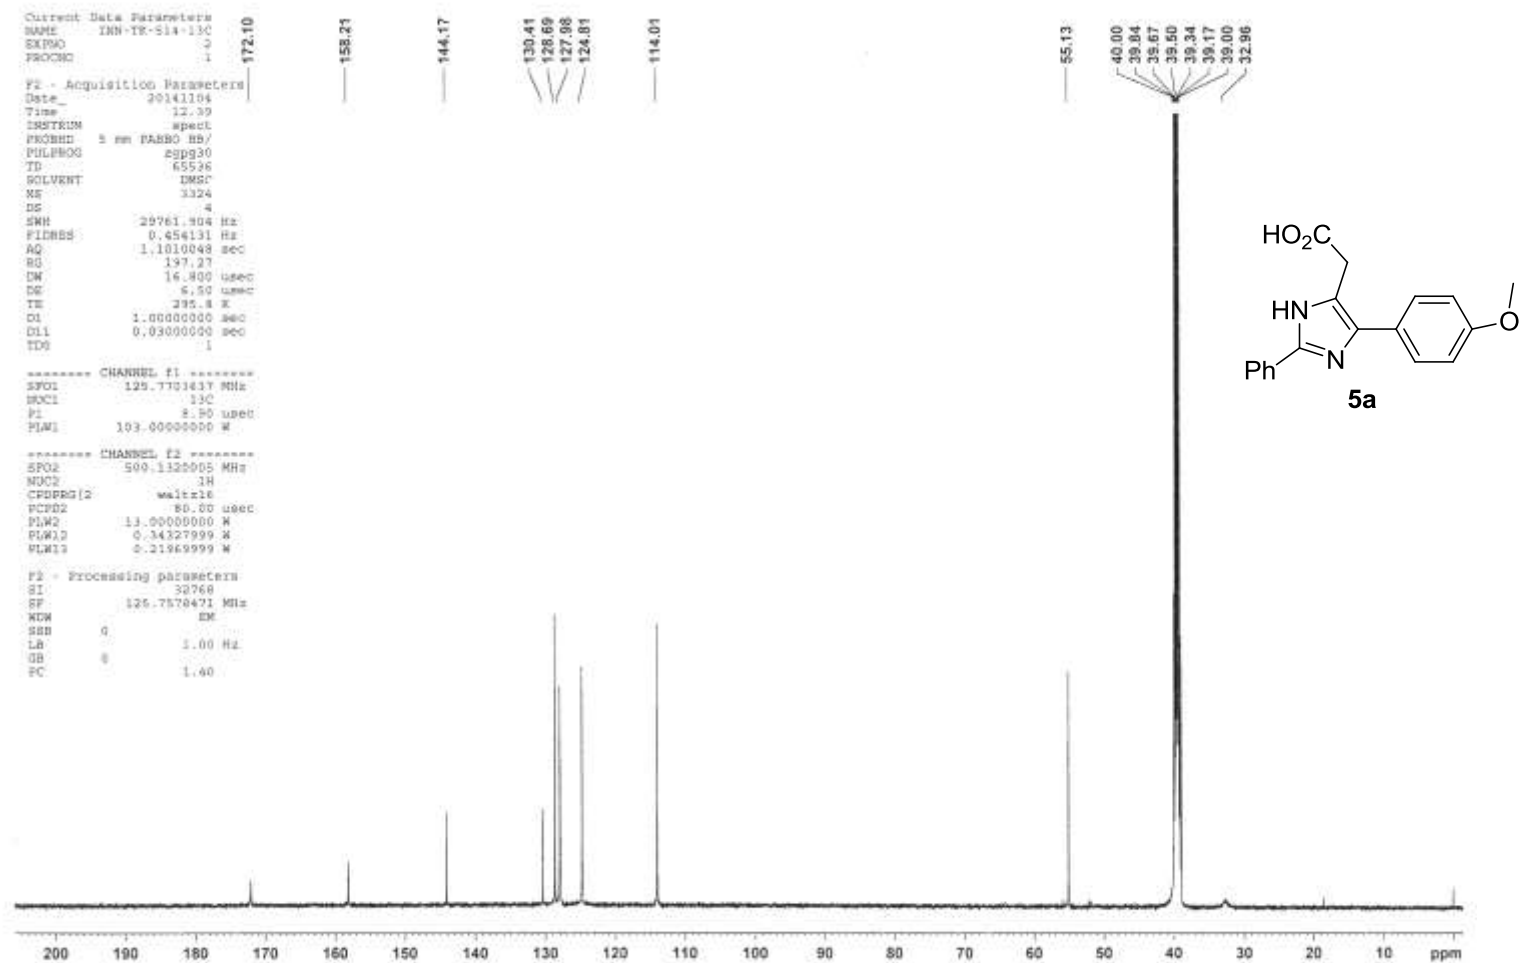

Figure S60. <sup>13</sup>C NMR spectrum of **5a**

# DEPARTMENT OF CHEMISTRY, I.I.T.(B)

## Analysis Info

Analysis Name D:\Data\NOV-14\INN-TK-514.d  
 Method Tune\_pos\_NAICSI-1000.m  
 Sample Name INN-TK-514  
 Comment C18H16N2O3

Acquisition Date 11/10/2014 7:21:10 PM

Operator CPR IN  
 Instrument maXis impact 282001.00081

## Acquisition Parameter

|             |          |                       |            |                  |           |
|-------------|----------|-----------------------|------------|------------------|-----------|
| Source Type | ESI      | Ion Polarity          | Positive   | Set Nebulizer    | 0.3 Bar   |
| Focus       | Active   | Set Capillary         | 3800 V     | Set Dry Heater   | 180 °C    |
| Scan Begin  | 50 m/z   | Set End Plate Offset  | -500 V     | Set Dry Gas      | 4.0 l/min |
| Scan End    | 1000 m/z | Set Collision Cell RF | 1500.0 Vpp | Set Divert Valve | Source    |

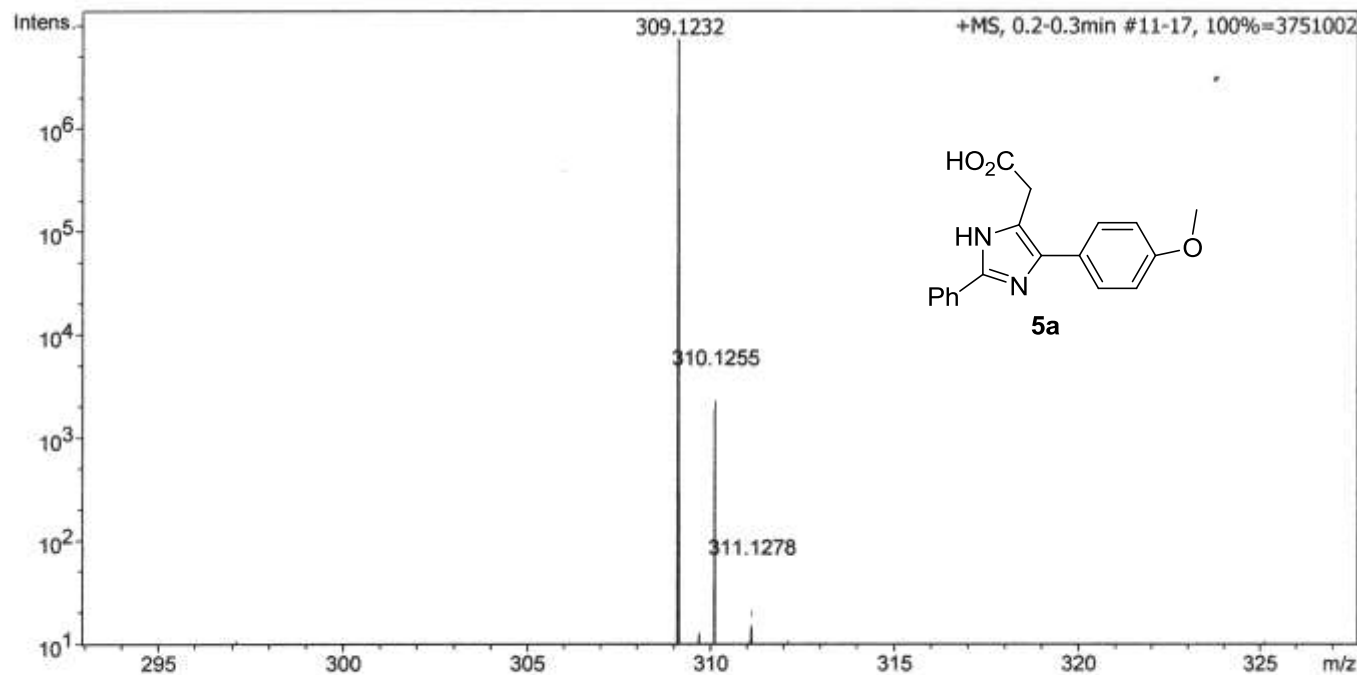

| Meas. m/z | # | Ion Formula | m/z      | err [ppm] | mSigma | # Sigma | Score  | rdb  | e <sup>-</sup> Conf | N-Rule |
|-----------|---|-------------|----------|-----------|--------|---------|--------|------|---------------------|--------|
| 309.1232  | 1 | C18H17N2O3  | 309.1234 | 0.4       | 104.8  | 1       | 100.00 | 11.5 | even                | ok     |

Figure S61. HRMS spectrum of **5a**

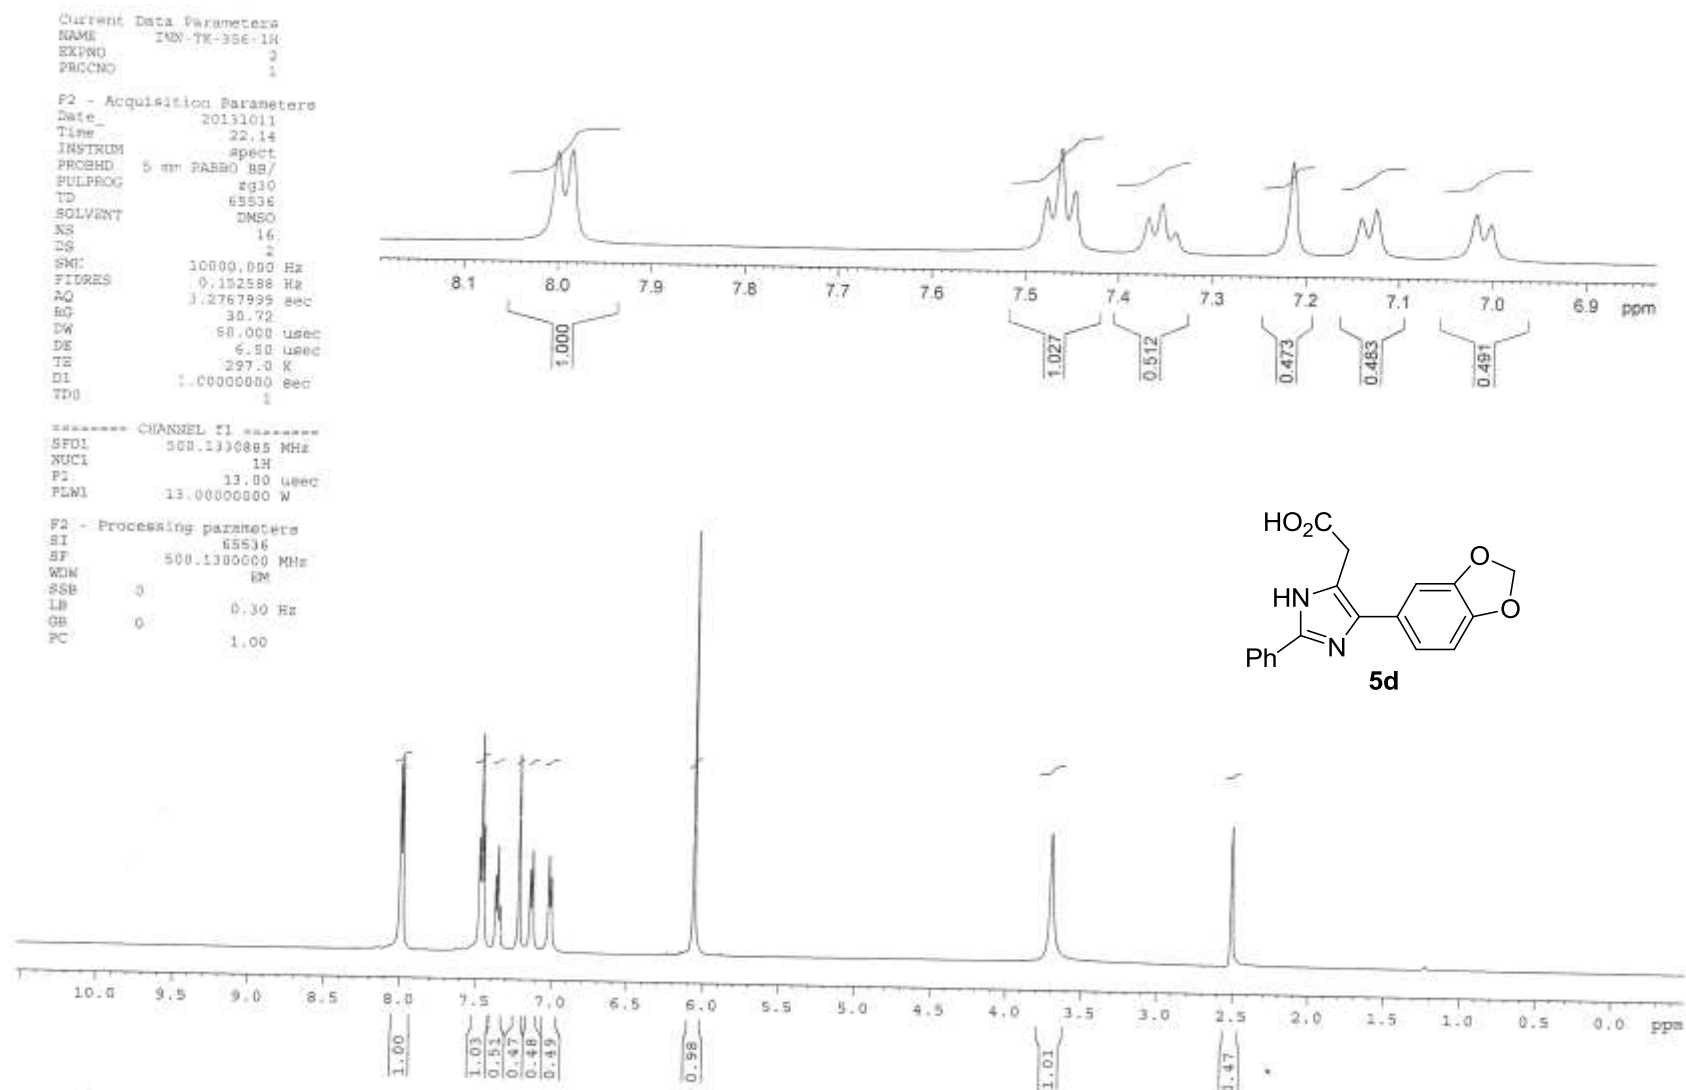

Figure S62.  $^1\text{H}$  NMR spectrum of **5d**

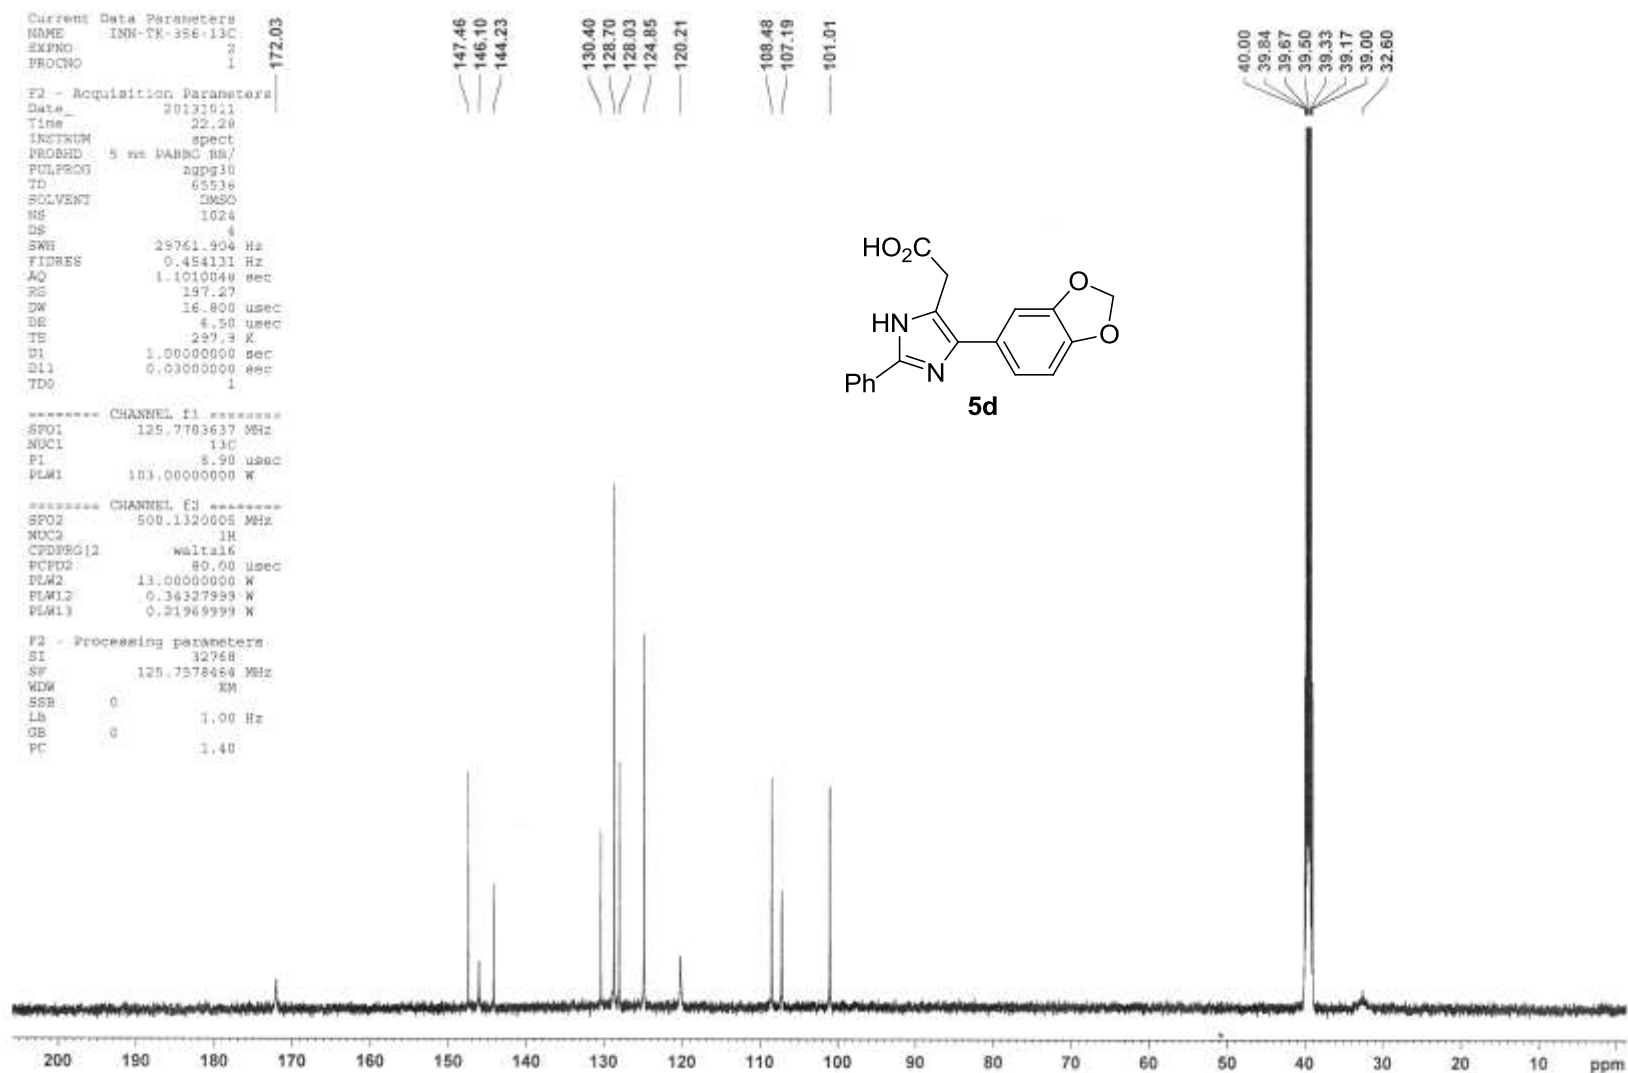

Figure S63.  $^{13}\text{C}$  NMR spectrum of **5d**

# Indian Institute of Technology (B)

## Analysis Info

Analysis Name D:\Data\JULY\_13\INN-TK-356.d  
 Method Tune\_pos\_Standard\_NAI-1500.m  
 Sample Name INN-TK-356  
 Comment C18H14N2O4

Acquisition Date 7/26/2013 3:28:29 PM

Operator IIT-B  
 Instrument maXis impact 282001.00081

## Acquisition Parameter

|             |          |                       |           |                  |           |
|-------------|----------|-----------------------|-----------|------------------|-----------|
| Source Type | ESI      | Ion Polarity          | Positive  | Set Nebulizer    | 2.1 Bar   |
| Focus       | Active   | Set Capillary         | 3200 V    | Set Dry Heater   | 180 °C    |
| Scan Begin  | 50 m/z   | Set End Plate Offset  | -500 V    | Set Dry Gas      | 7.0 l/min |
| Scan End    | 1500 m/z | Set Collision Cell RF | 900.0 Vpp | Set Divert Valve | Source    |

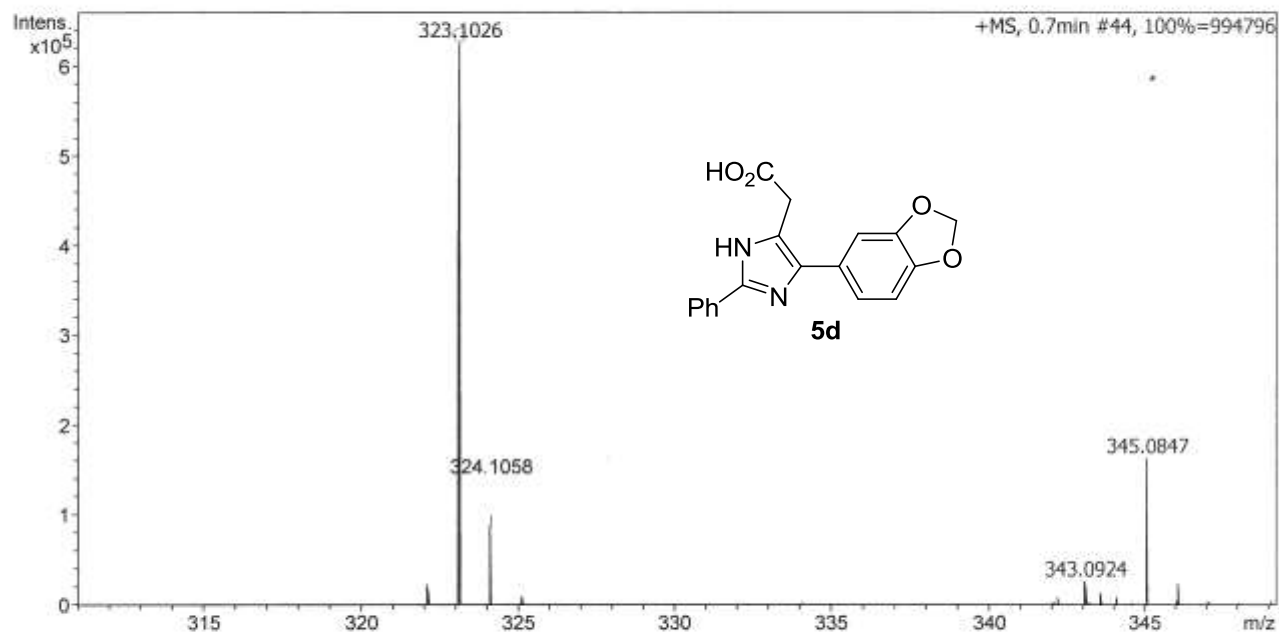

| Meas. m/z | # | Ion Formula | m/z      | err [ppm] | mSigma | # Sigma | Score  | rdb  | e <sup>-</sup> Conf | N-Rule |
|-----------|---|-------------|----------|-----------|--------|---------|--------|------|---------------------|--------|
| 323.1026  | 1 | C18H15N2O4  | 323.1026 | 0.0       | 37.5   | 1       | 100.00 | 12.5 | even                | ok     |

Figure S64. HRMS spectrum of **5d**

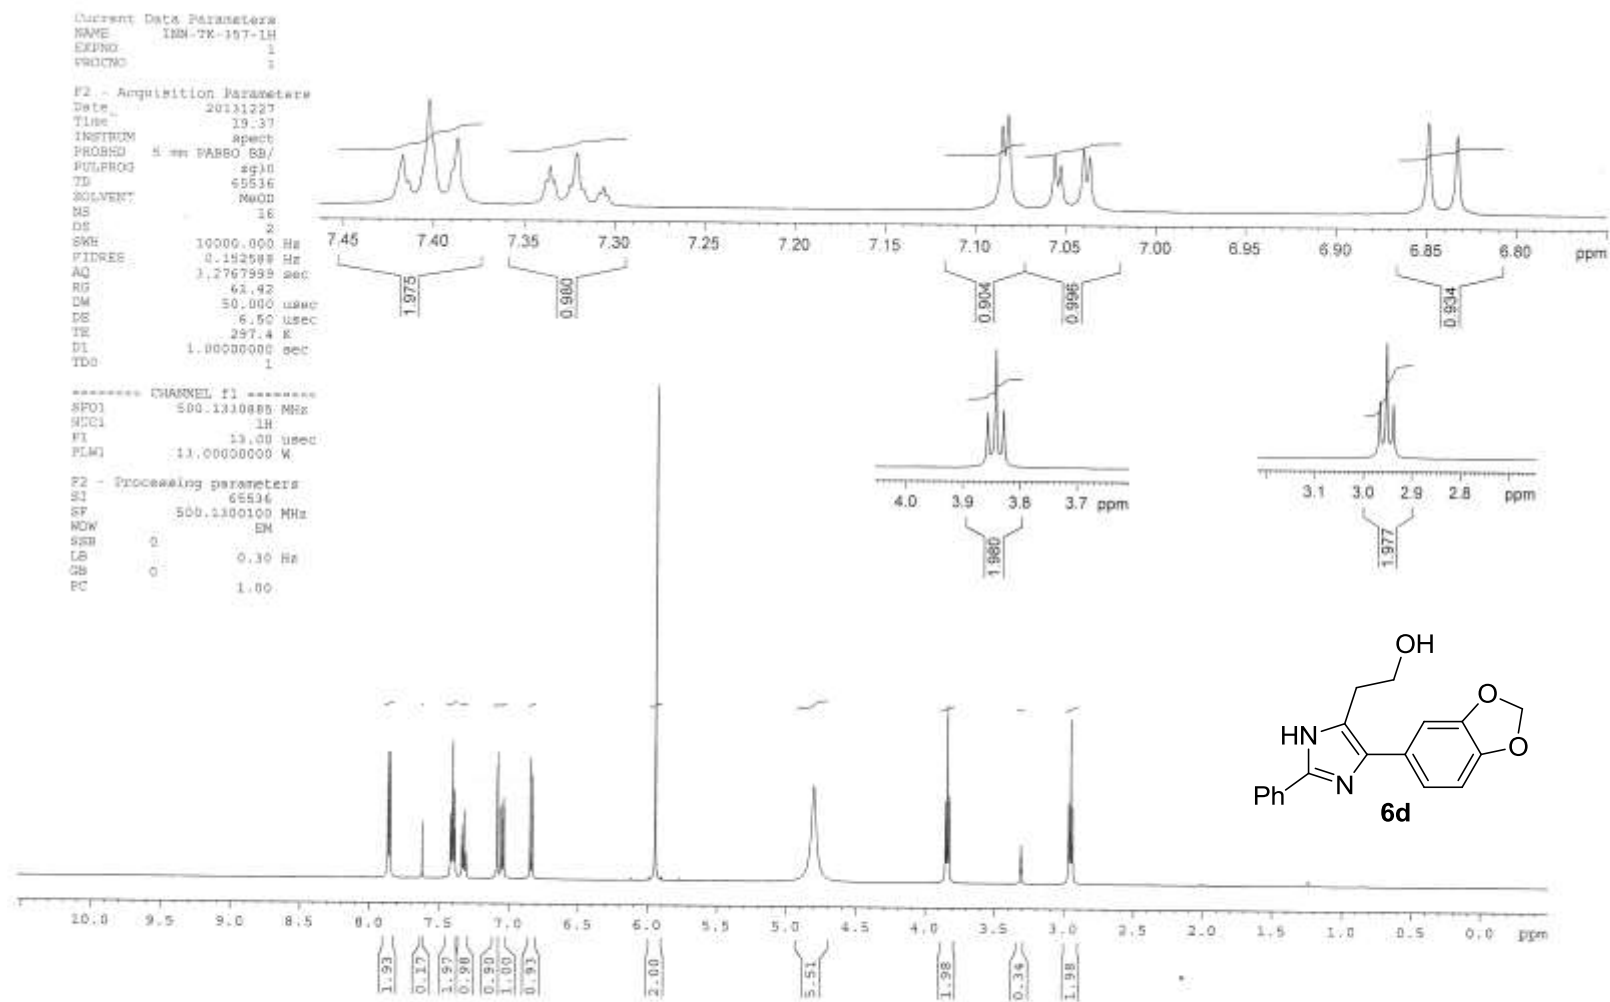

Figure S65.  $^1\text{H}$  NMR spectrum of **6d**

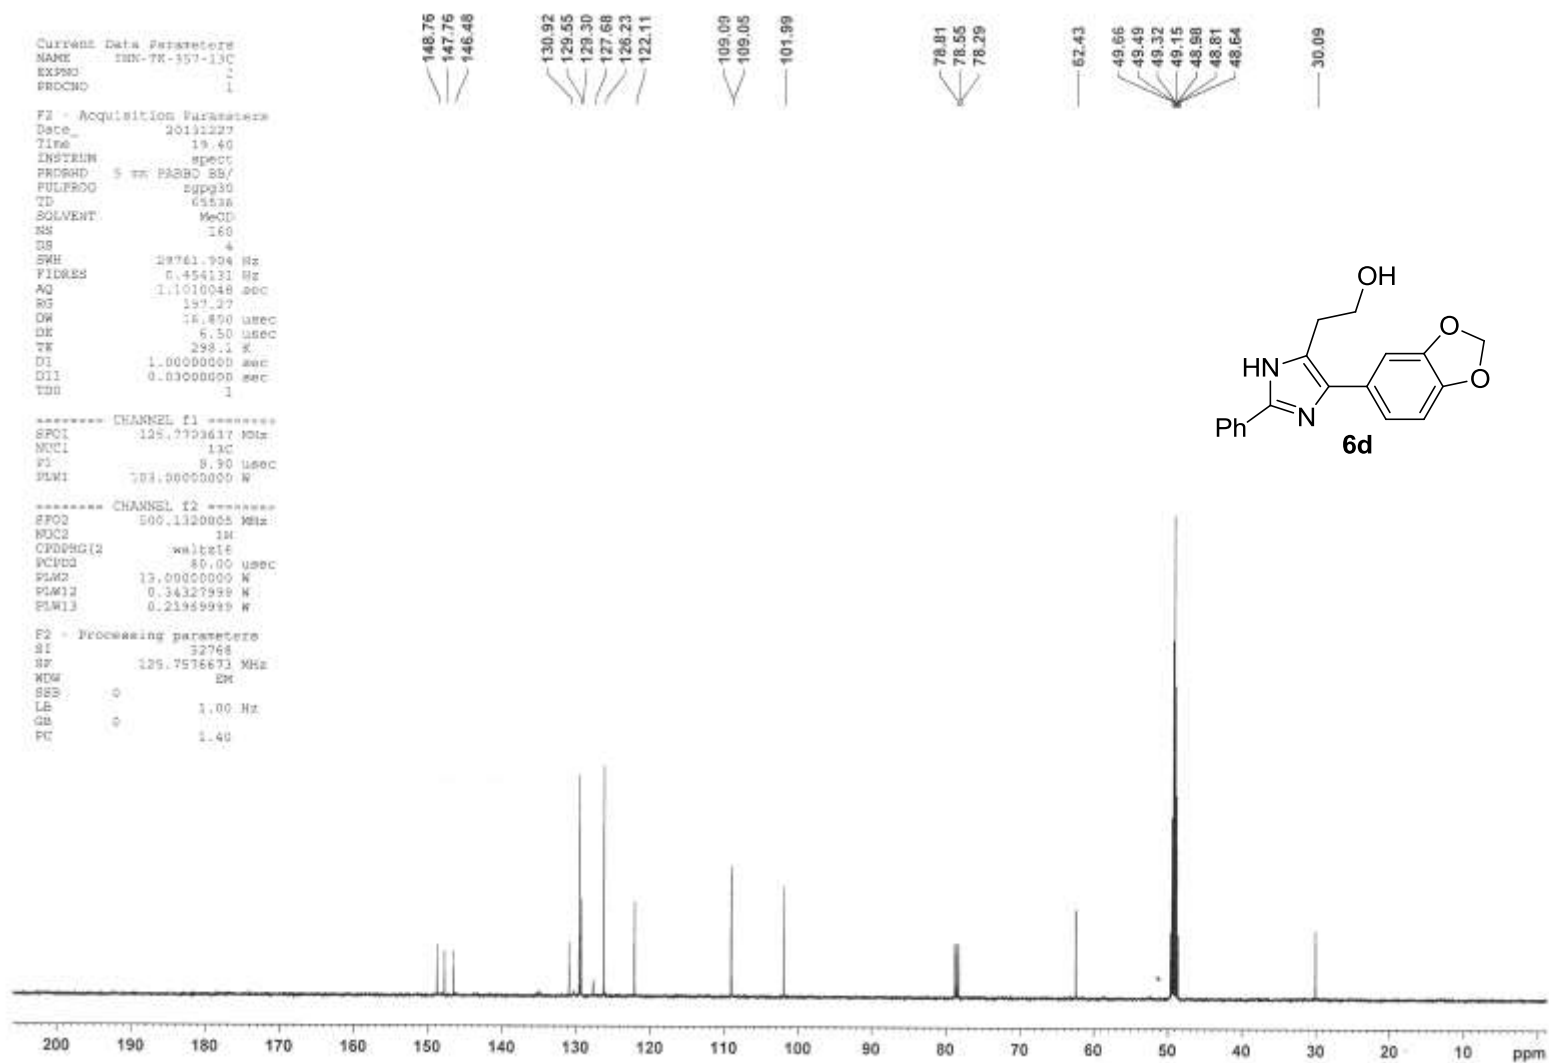

Figure S66.  $^{13}\text{C}$  NMR spectrum of **6d**

# Indian Institute of Technology (B)

## Analysis Info

Analysis Name D:\Data\DEC-13\INN-TK-357.d  
 Method Tune\_pos\_Standard\_NAI-1000.m  
 Sample Name INN-TK-357  
 Comment C18HH16O3N2

Acquisition Date 12/31/2013 3:29:59 PM

Operator INN-IN  
 Instrument maXis impact 282001.00081

## Acquisition Parameter

|             |          |                       |            |                  |           |
|-------------|----------|-----------------------|------------|------------------|-----------|
| Source Type | ESI      | Ion Polarity          | Positive   | Set Nebulizer    | 0.3 Bar   |
| Focus       | Active   | Set Capillary         | 3700 V     | Set Dry Heater   | 180 °C    |
| Scan Begin  | 50 m/z   | Set End Plate Offset  | -500 V     | Set Dry Gas      | 4.0 l/min |
| Scan End    | 1000 m/z | Set Collision Cell RF | 1500.0 Vpp | Set Divert Valve | Source    |

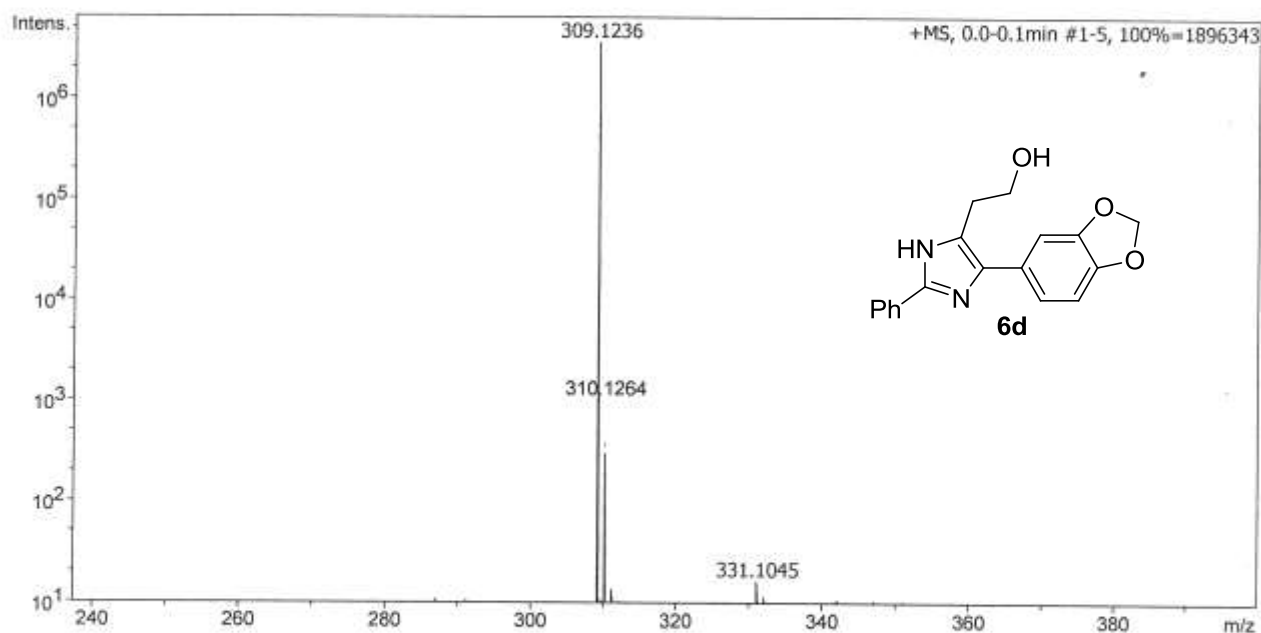

| Meas. m/z | # | Ion Formula | m/z      | err [ppm] | mSigma | # Sigma | Score  | rdb  | e <sup>-</sup> Conf | N-Rule |
|-----------|---|-------------|----------|-----------|--------|---------|--------|------|---------------------|--------|
| 309.1236  | 1 | C18H17N2O3  | 309.1234 | 0.7       | 36.0   | 1       | 100.00 | 11.5 | even                | ok     |

Figure S67. HRMS spectrum of **6d**

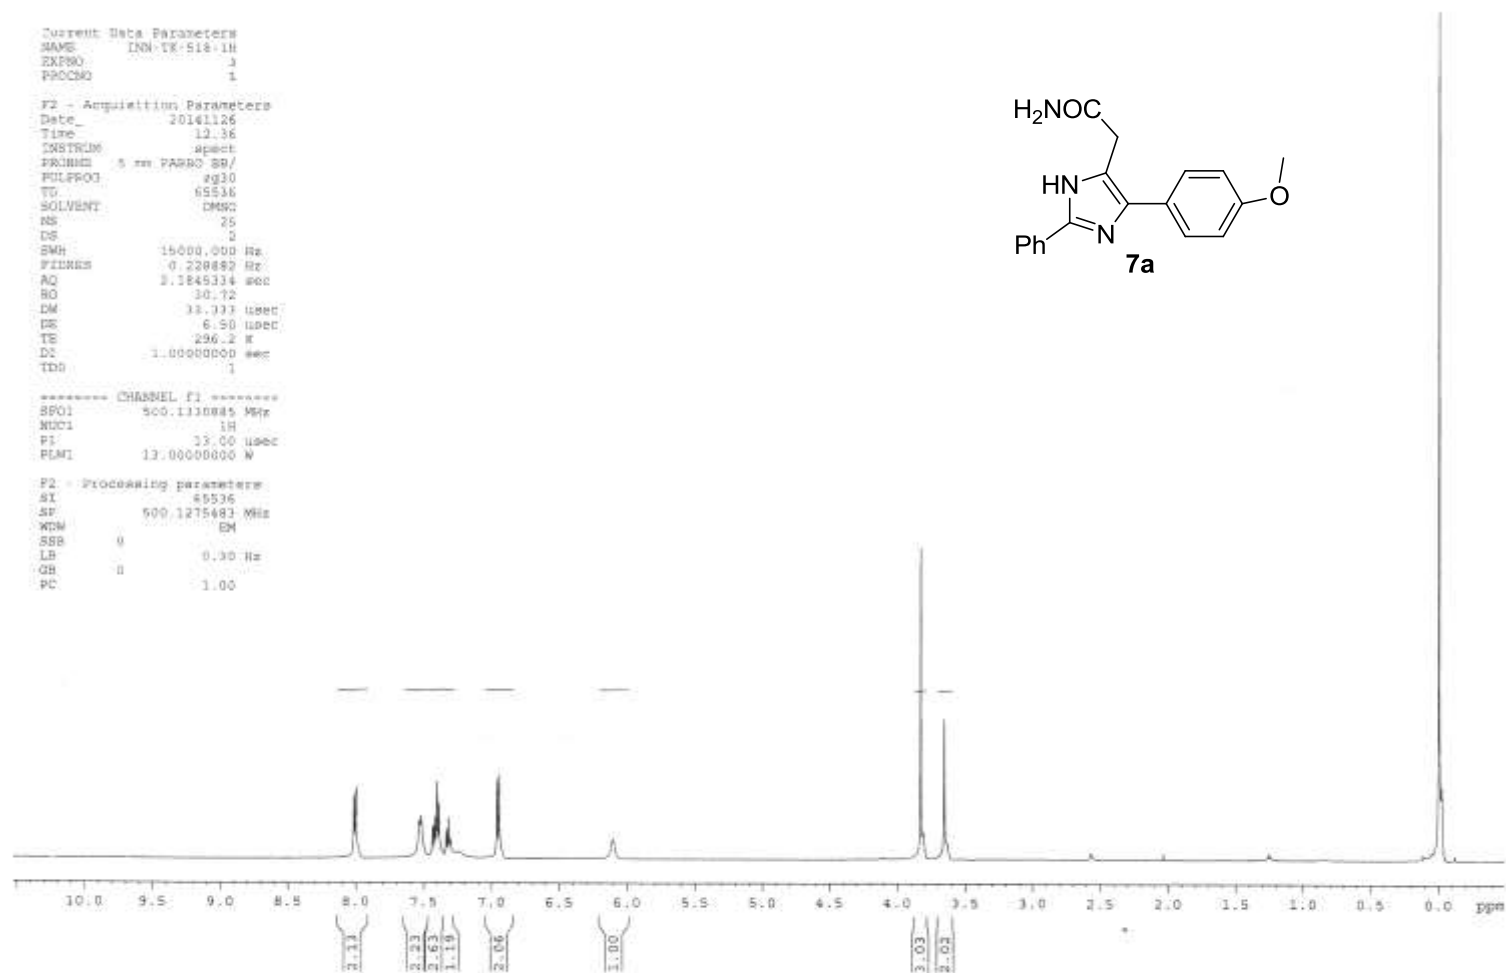

Figure S68.  $^1\text{H}$  NMR spectrum of **7a**

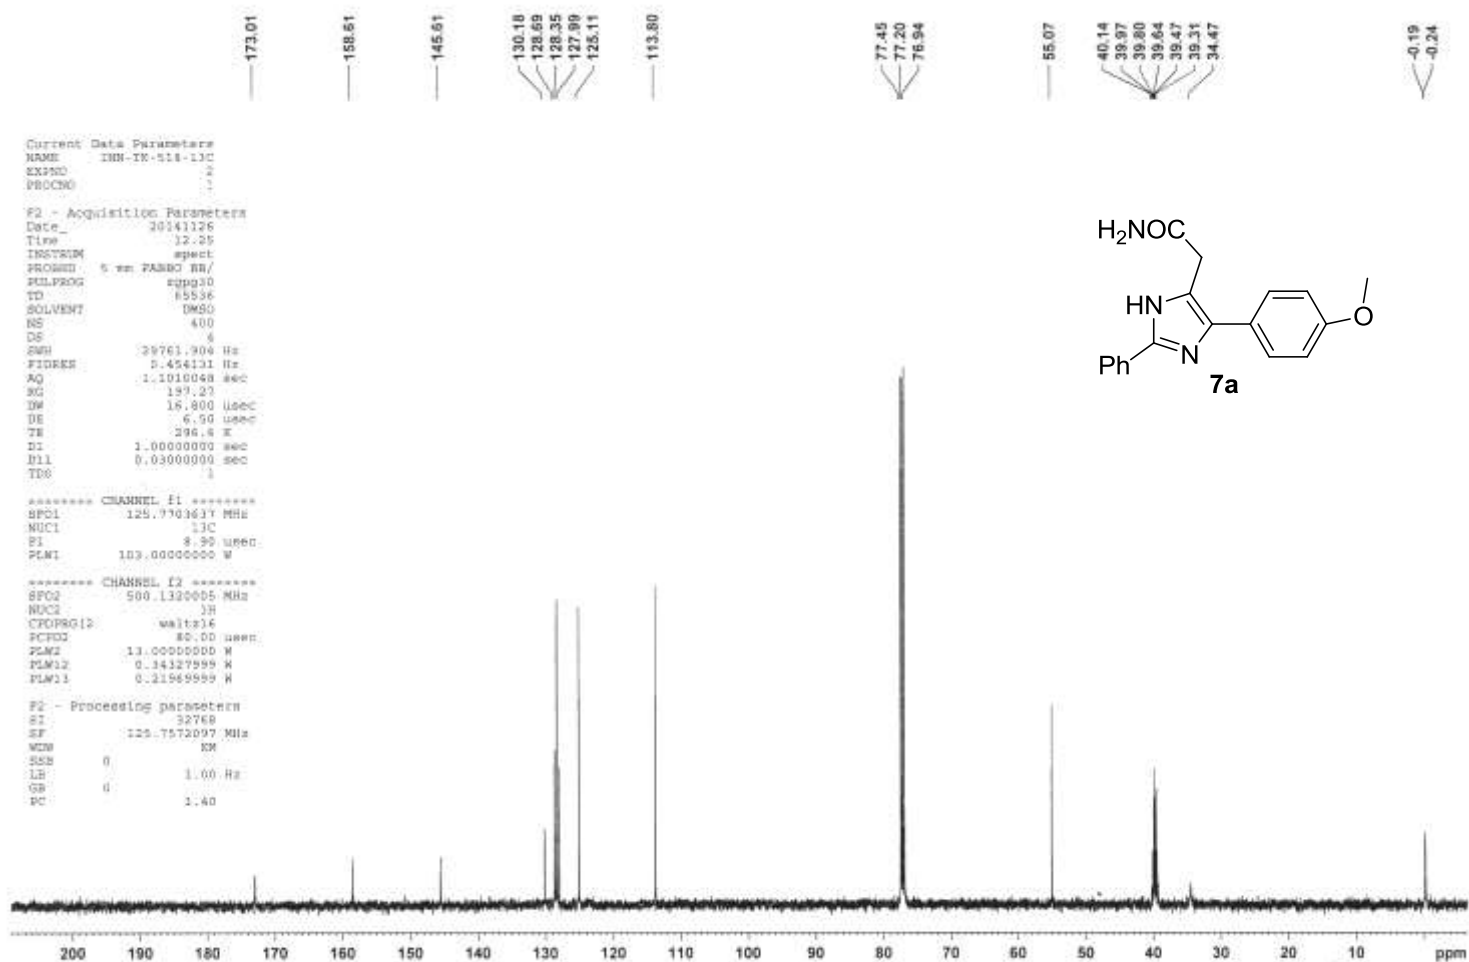

Figure S69.  $^{13}\text{C}$  NMR spectrum of **7a**

# DEPARTMENT OF CHEMISTRY, I.I.T.(B)

## Analysis Info

Analysis Name D:\Data\NOV-14\INN-TK-518.d  
 Method Tune\_pos\_NAICSI-500.m  
 Sample Name INN-TK-518  
 Comment C18H17N3O2

Acquisition Date 11/26/2014 1:26:39 PM  
 Operator DM OUT  
 Instrument maXis impact 282001.00081

## Acquisition Parameter

|             |          |                       |           |                  |           |
|-------------|----------|-----------------------|-----------|------------------|-----------|
| Source Type | ESI      | Ion Polarity          | Positive  | Set Nebulizer    | 0.3 Bar   |
| Focus       | Active   | Set Capillary         | 3800 V    | Set Dry Heater   | 180 °C    |
| Scan Begin  | 50 m/z   | Set End Plate Offset  | -500 V    | Set Dry Gas      | 4.0 l/min |
| Scan End    | 1000 m/z | Set Collision Cell RF | 900.0 Vpp | Set Divert Valve | Source    |

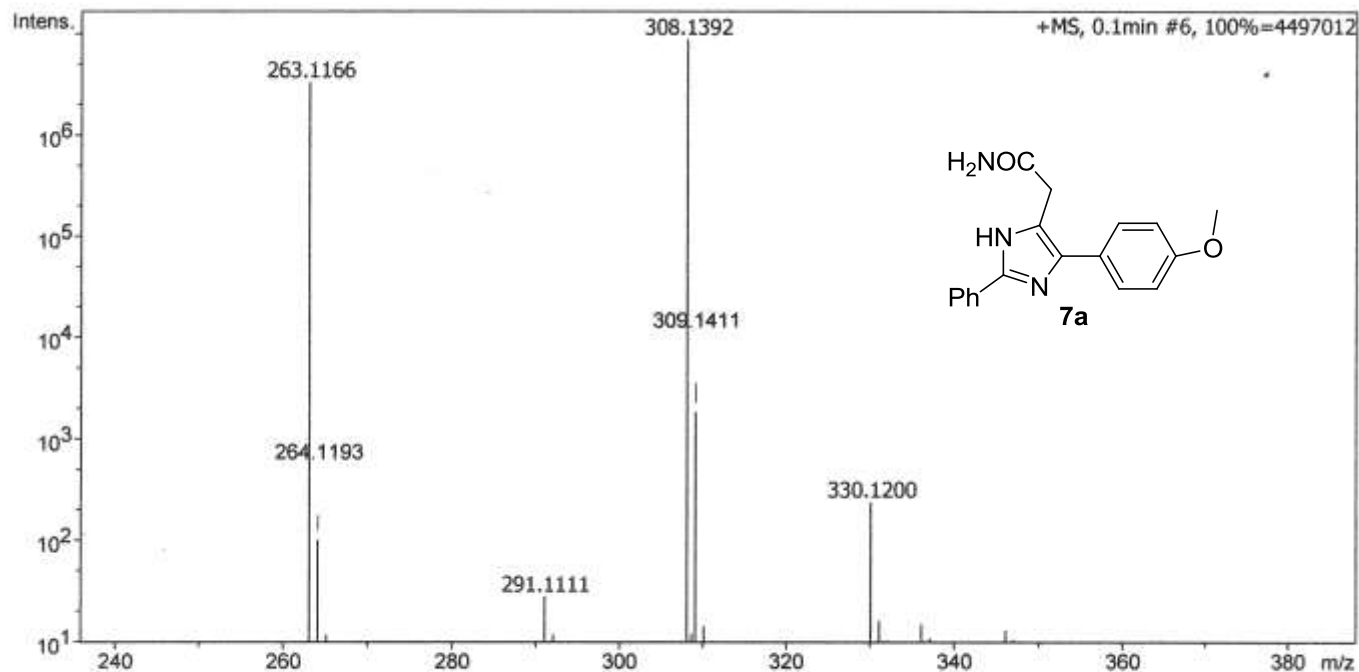

| Meas. m/z | # | Ion Formula | m/z      | err [ppm] | mSigma | # Sigma | Score  | rdB  | e <sup>-</sup> Conf | N-Rule |
|-----------|---|-------------|----------|-----------|--------|---------|--------|------|---------------------|--------|
| 308.1392  | 1 | C18H18N3O2  | 308.1394 | -0.6      | 99.9   | 1       | 100.00 | 11.5 | even                | ok     |

Figure S70. HRMS spectrum of **7a**

```

NAME      INH-TK-359-1H-
EXPNO     7
PROCNO     1
Date_      20130813
Time       14.33
INSTRUM    spect
PROBHD     5 mm PABBO BB-
PULPROG    zg30
TD         65536
SOLVENT    MeOD
NS         8
DS         0
SWH         8223.685 Hz
FIDRES     0.125483 Hz
AQ         3.9846387 sec
RG         32
DW         60.800 usec
DE         6.50 usec
TE         294.4 K
D1         1.00000000 sec
TD0        1

```

```

===== CHANNEL f1 =====
NUC1       1H
P1         13.50 usec
PL1        -1.00 dB
PL1W       10.56200695 W
SFO1       400.1324710 MHz
SI         32768
SF         400.1300095 MHz
WDW         EM
SSB         0
LB         0.30 Hz
GB         0
PC         1.00

```

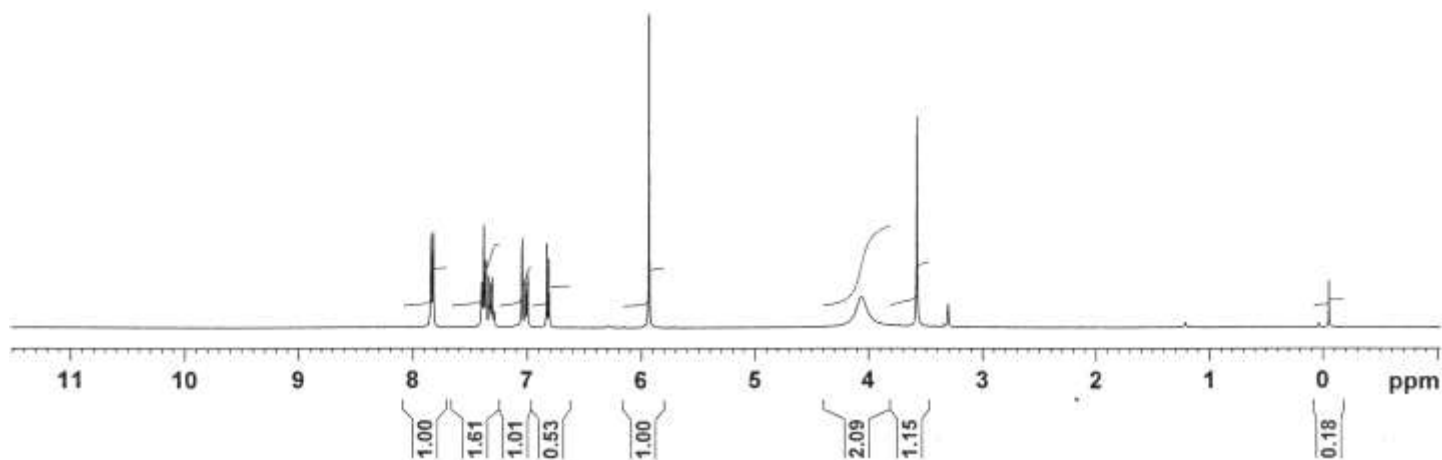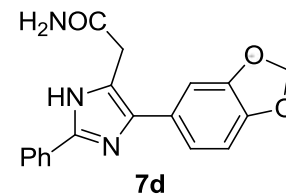

Figure S71. <sup>1</sup>H NMR spectrum of **7d**

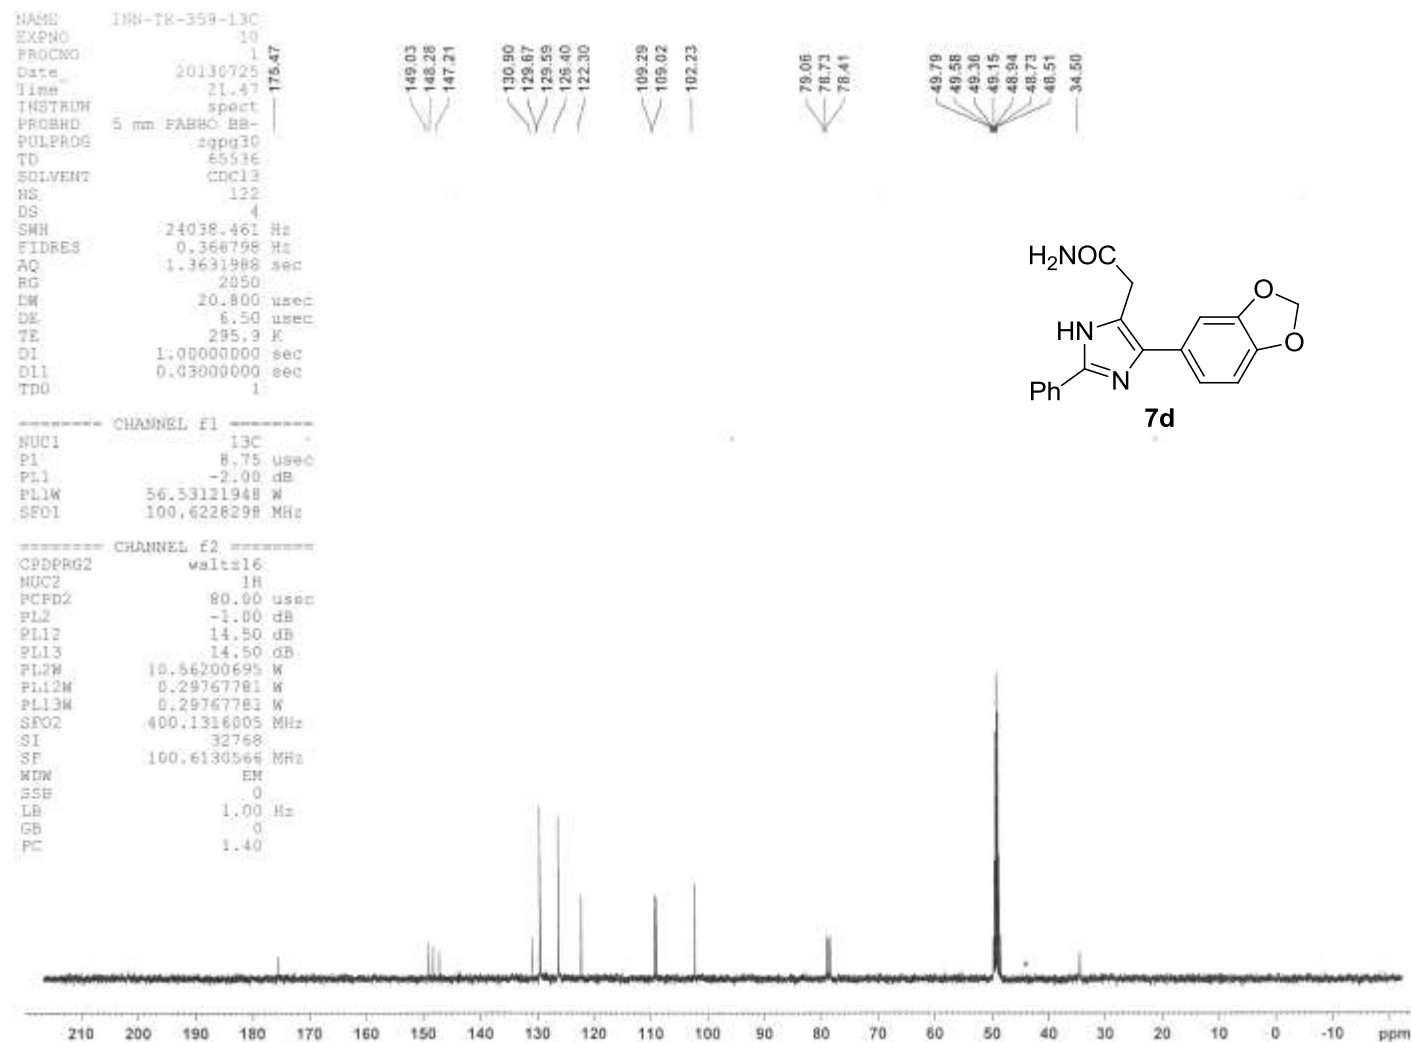

Figure S72.  $^{13}\text{C}$  NMR spectrum of **7d**

# Indian Institute of Technology (B)

## Analysis Info

Analysis Name D:\Data\JULY\_13\INN-TK-359.d  
 Method Tune\_pos\_Standard\_NAI-1500.m  
 Sample Name INN-TK-359  
 Comment C18H15N3O3

Acquisition Date 7/26/2013 3:02:29 PM

Operator IIT-B  
 Instrument maXis impact 282001.00081

## Acquisition Parameter

|             |          |                       |           |                  |           |
|-------------|----------|-----------------------|-----------|------------------|-----------|
| Source Type | ESI      | Ion Polarity          | Positive  | Set Nebulizer    | 2.1 Bar   |
| Focus       | Active   | Set Capillary         | 3200 V    | Set Dry Heater   | 180 °C    |
| Scan Begin  | 50 m/z   | Set End Plate Offset  | -500 V    | Set Dry Gas      | 7.0 l/min |
| Scan End    | 1500 m/z | Set Collision Cell RF | 900.0 Vpp | Set Divert Valve | Source    |

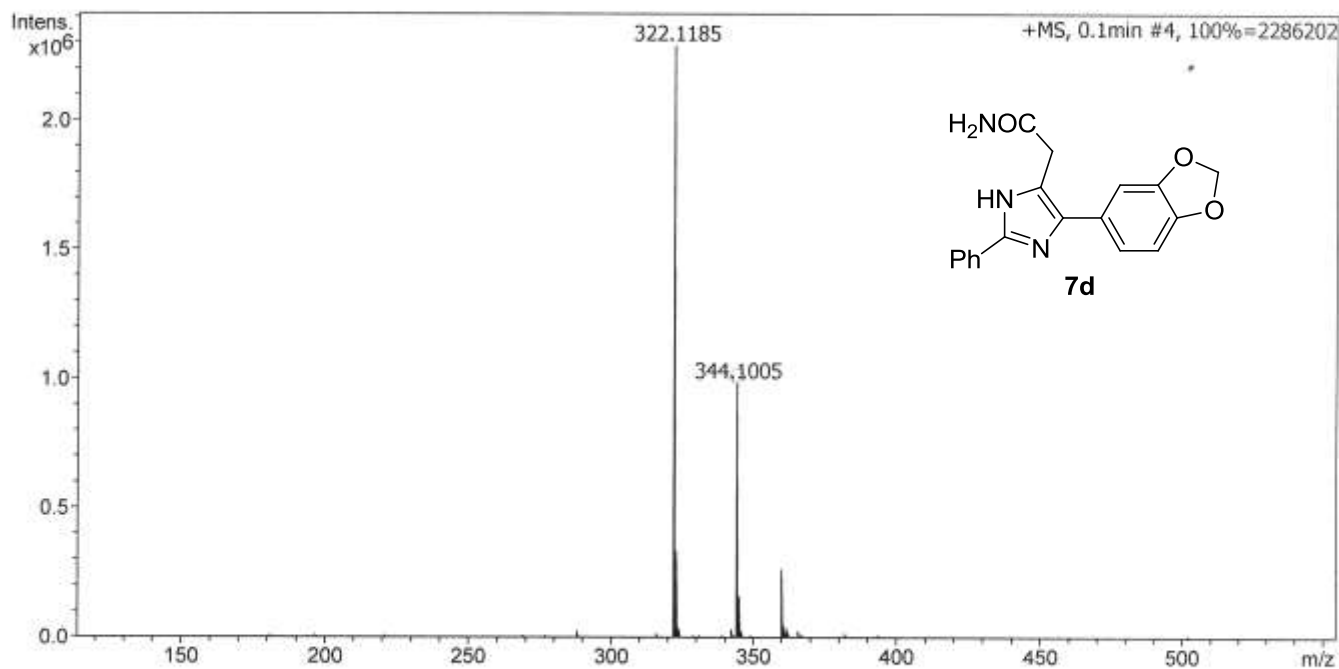

| Meas. m/z | # | Ion Formula  | m/z      | err [ppm] | mSigma | # Sigma | Score  | rdb  | e <sup>-</sup> Conf | N-Rule |
|-----------|---|--------------|----------|-----------|--------|---------|--------|------|---------------------|--------|
| 344.1005  | 1 | C18H15N3NaO3 | 344.1006 | 0.2       | 26.1   | 1       | 100.00 | 12.5 | even                | ok     |

Figure S73. HRMS spectrum of **7d**
